# Supplementary material
Source: PubMed Central journal article supplement (PMC5575773)
Supplement: NIHMS897319-supplement-Figures.pdf [file NIHMS897319-supplement-Figures.pdf]

Supplementary Fig. 1

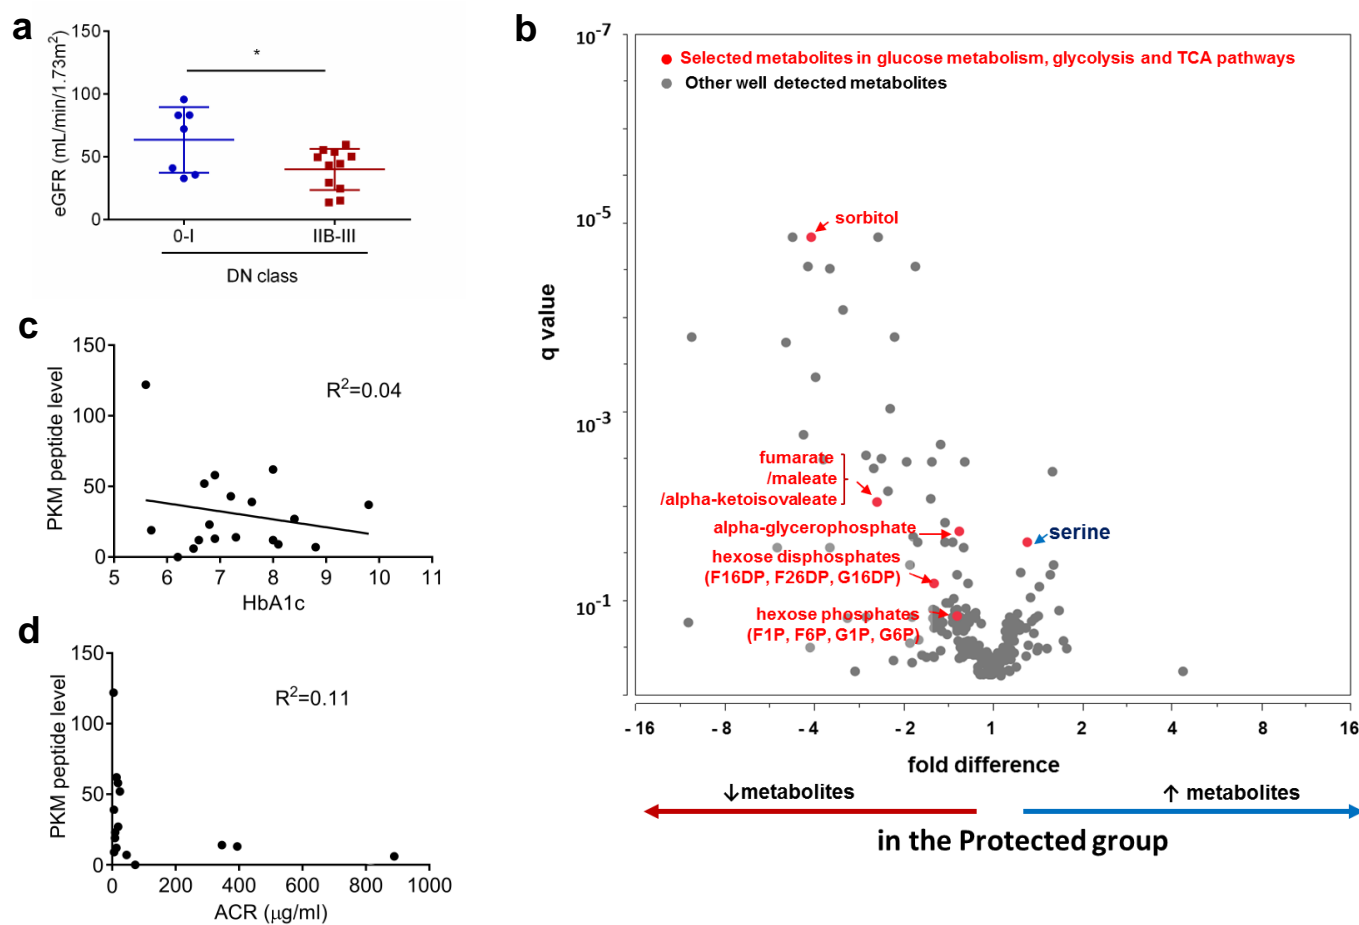

**Supplementary Fig. 1** Clinical parameters correlations with PKM and plasma metabolomics profiling in Joslin Medalists. **(a)** Association of eGFR and DN class. Protected (No or mild DN),  $n = 7$ ; Non-protected (DN),  $n = 11$ . All values are median and interquartile range and analyzed by unpaired student's t test.  $*P < 0.05$ . **(b)** Plasma metabolomics (volcano plot): fold differences between the protected ( $n = 16$ ) and non-protected ( $n = 13$ ) groups (x axis) are plotted against q value (significances of the associations adjusted for multiple testing). Metabolites of interest (glucose metabolism, glycolysis and TCA pathways) are presented as red circles. All other metabolites are presented as grey circles. Metabolomic profiling of plasma samples from 29 Medalists evaluated a total of 295 metabolites. 251 metabolites (85%) were detected in at least two thirds of the Medalists. Concentrations of 56 metabolites differed between the study groups by nominal  $P$  value ( $P < 0.05$ ) and associations remained significant for 38 metabolites in the analysis adjusted for multiple testing ( $q < 0.05$ ). There were 15 metabolites or biochemical groups present on the platform representing pathways of interest (glycolysis and TCA cycle). 5 metabolite/biochemical groups of the relevant pathways differed significantly between protected and non-protected. There were no significantly different metabolites in the semi-quantitative analysis of the non-well detectable metabolites (data not shown). Refer to Supplementary Table 7 for information on the selected metabolites. **(c)** Pearson correlation of glomerular PKM peptide number and HbA1c. Protected  $n = 7$ ; Non-protected  $n = 11$ . **(d)** Correlation of ACR and glomerular PKM peptide level. Protected  $n = 6$ ; Non-protected  $n = 9$ .

Supplementary Fig. 2

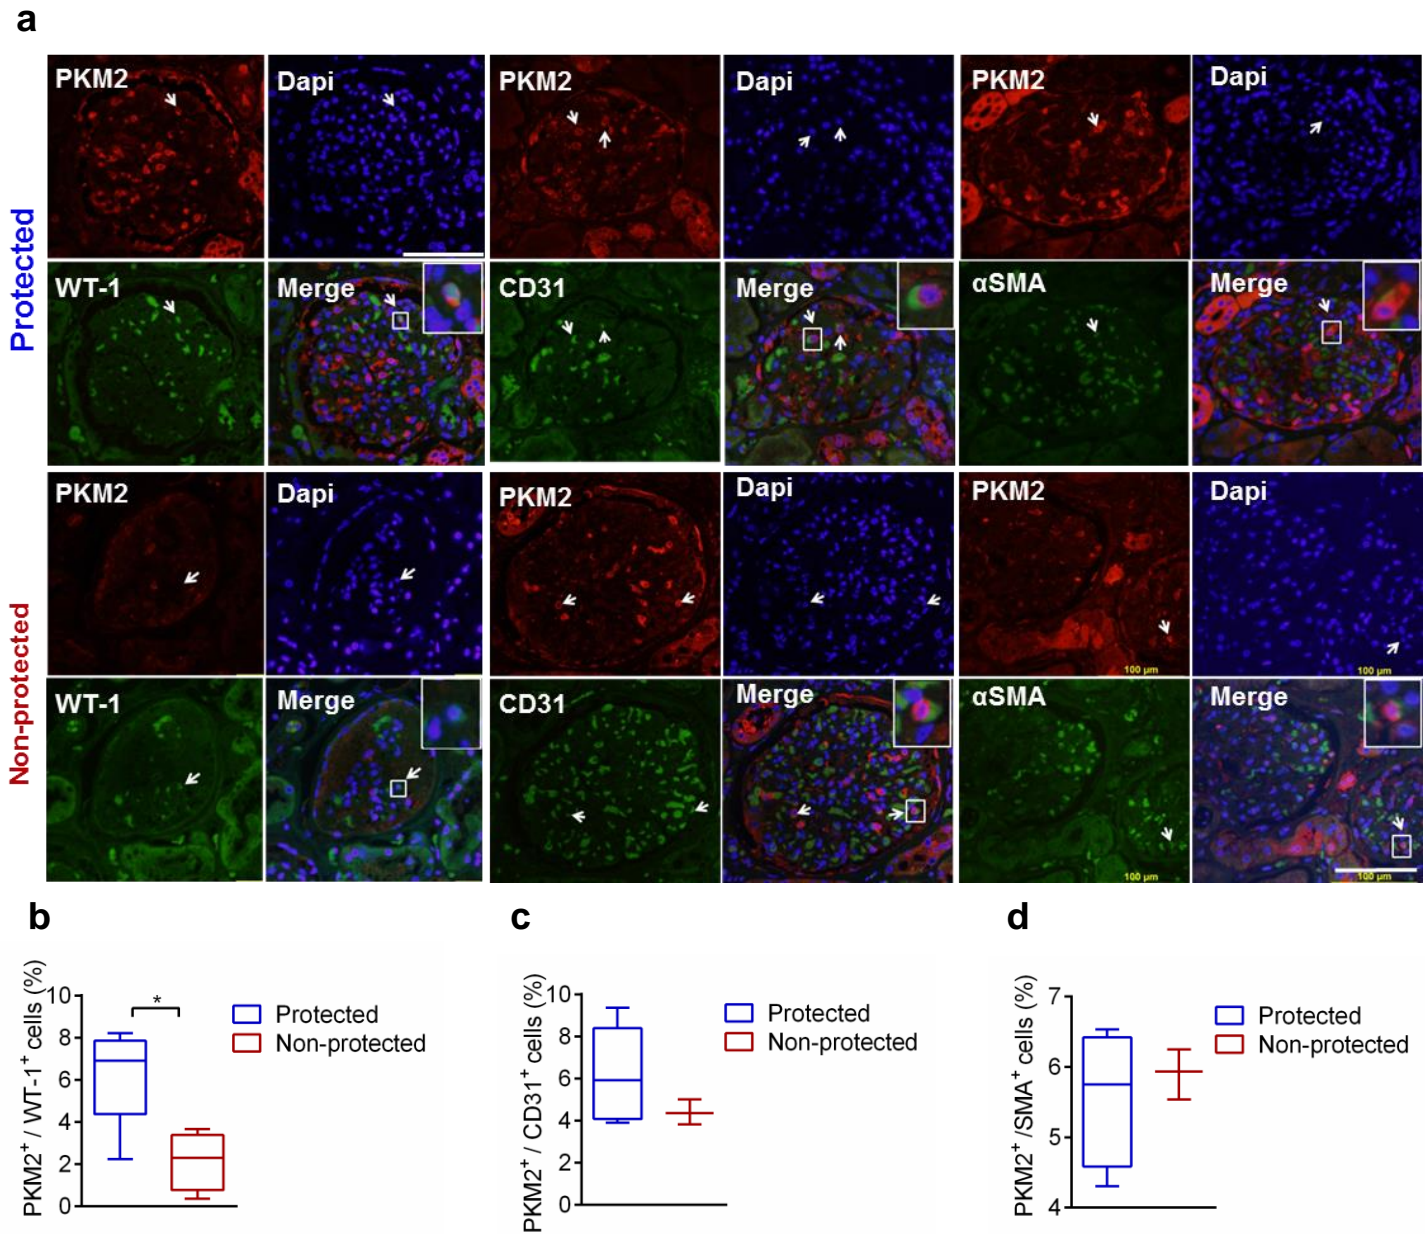

**Supplementary Fig. 2** PKM2 in glomerular cells from Joslin Medalists

(a) Representative images of co-immunofluorescent staining of PKM2 with

(b) Podocyte marker WT-1 (nuclear protein)

(c) Endothelial cell marker CD31 (cell surface protein)

(d) Mesangial cell marker αSMA (cytosolic protein)

Scale bar, 100 μm. Protected  $n = 5$ ; Non-protected  $n = 4$ .

For box plots, center lines represent the median; limits represent quartiles; whiskers represent minimum and maximum values. Data were analyzed by unpaired student's t test. \* $P < 0.05$ .

Supplementary Fig 3

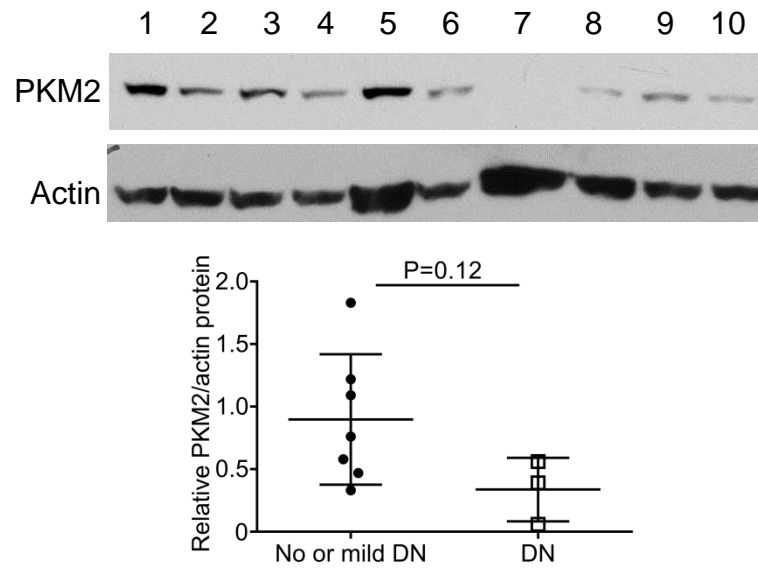

**Supplementary Fig. 3** PKM2 protein levels in the glomeruli from non-Medalist cohort with diabetes

Representative blots were shown. No or mild DN (lane #1-6 and #8; DN class 0-IIA)  $n = 7$  subjects, DN (lane #7, 9-10; DN class IIB-IV)  $n = 3$  subjects. Samples were repeated in two independent Western blotting experiments. PKM2 protein was normalized to actin. The data shown in the graph is calculated with the average of the two independent Western blotting experiments for each subject. All values are mean  $\pm$  SEM and analyzed by unpaired student's t test.

Supplementary Fig. 4

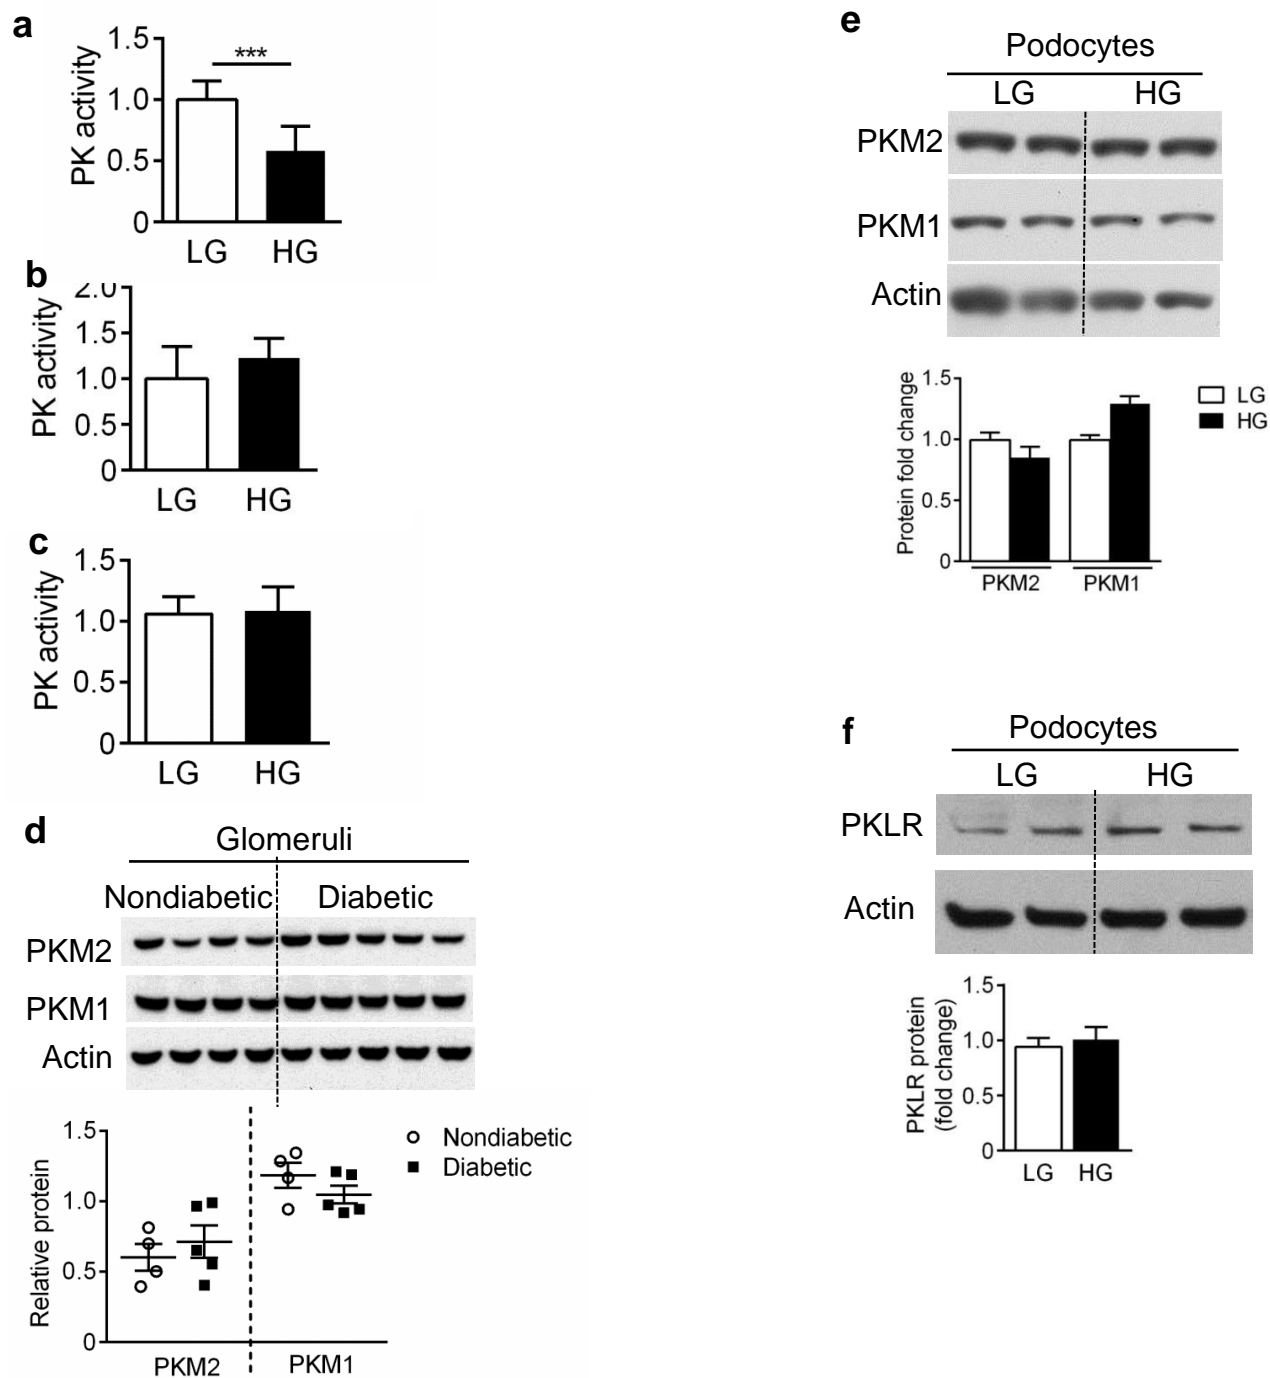

**Supplementary Fig. 4** Effects of high glucose and diabetes on PK activity and the expression of PKM isoforms and PKLR

PK activity in **(a)** human podocytes ( $n = 9$ ), **(b)** rat mesangial cells ( $n = 6$ ), **(c)** retinal endothelial cells ( $n = 6$ ) treated with high glucose (HG; 25mM D-glucose) for 24 hrs. All values are means  $\pm$  SD. **(d)** PKM2 and PKM1 in glomeruli from 2 months post-STZ DBA2/J mice. Non-diabetic  $n = 4$  mice, diabetic  $n = 5$  mice. **(e,f)** Representative blots of PKM1, PKM2 ( $n = 4$ ) and PKLR ( $n = 6$ ) in podocytes treated with LG and HG for 24hrs. All values are means  $\pm$  SEM. Data in this figure were analyzed by unpaired student's t test. \*\*\* $P < 0.001$ .

Supplementary Fig. 5

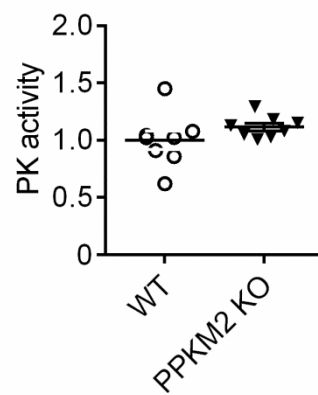

**Supplementary Fig. 5** PK activity in podocytes from PPKM2 KO mice

PK activity in podocytes isolated from WT and PPKM2 KO mice.  $n = 8$  mice. All values are means  $\pm$  SEM and analyzed using unpaired student's t test.

Supplementary Fig. 6

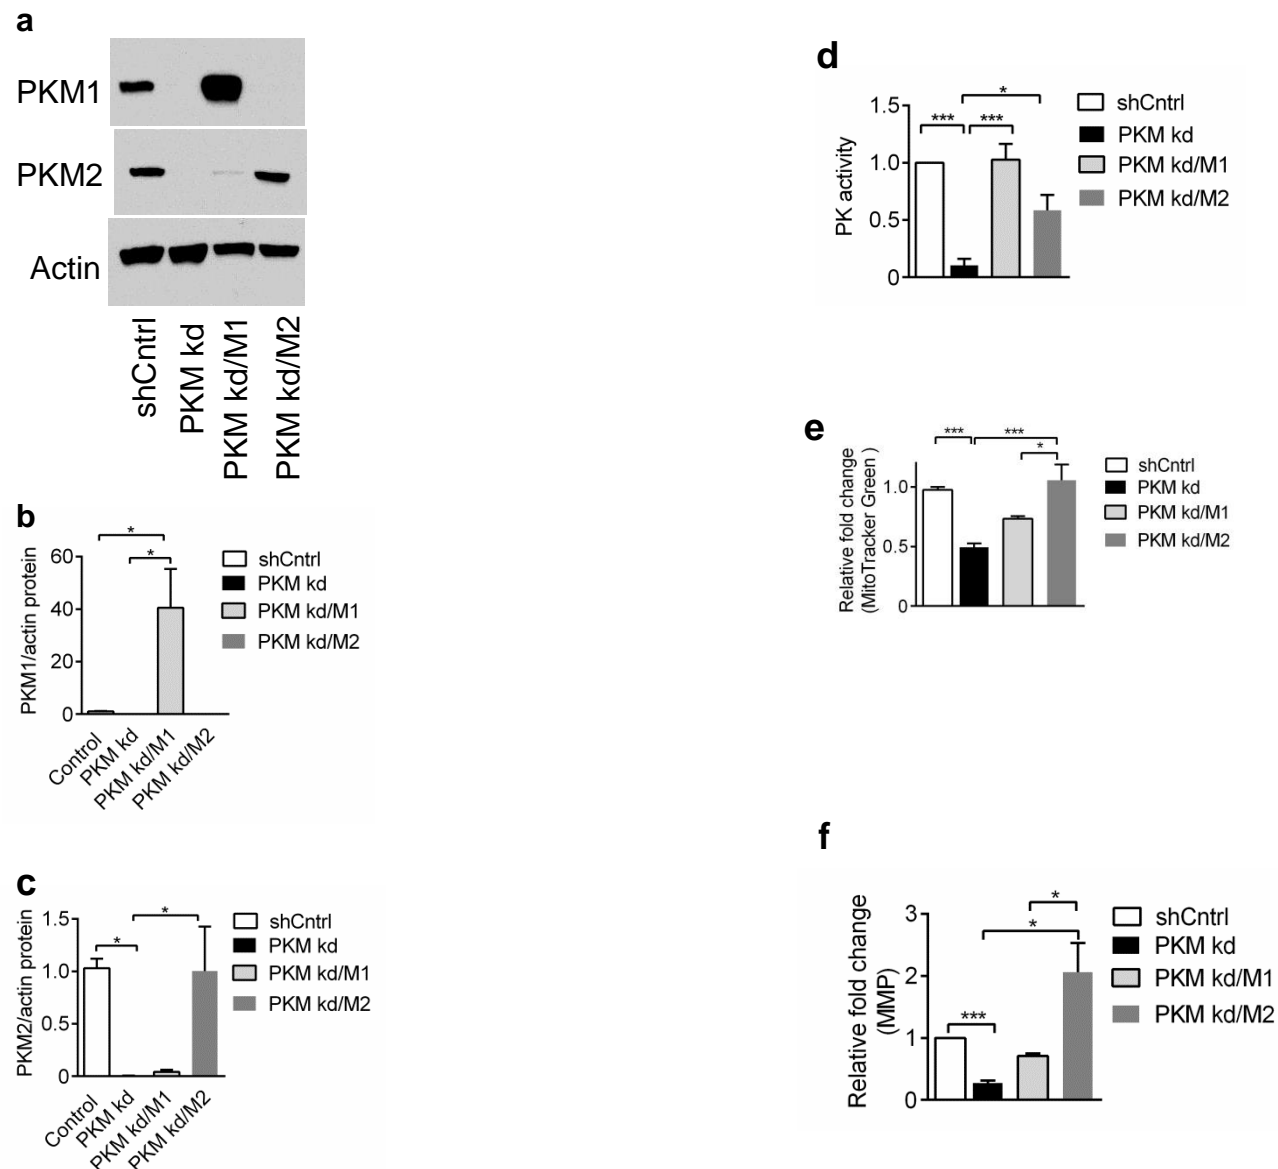

**Supplementary Fig. 6** The effects of re-expressing PKM1 or PKM2 in PKM knockdown podocytes on mitochondrial metabolism

Re-expressing of PKM1 or PKM2 in PKM knockdown podocytes stable cell lines. All representative blot images were shown.

(**a-c**) PKM1 and PKM2 protein levels ( $n = 3$ ); (**d**) PK activity ( $n = 4$ ), (**e**) mito Tracker Green ( $n = 6$ ) and (**f**) MMP ( $n = 5$ ). All values are means  $\pm$  SEM. Comparison of more than two groups was analyzed using ANOVA. When overall F-tests were significant ( $P < 0.05$ ), post hoc comparisons using Tukey's method of adjustment were conducted to determine the location of any significant pairwise differences. \*\*\* $P < 0.001$ , \*  $P < 0.05$ .

Supplementary Fig. 7

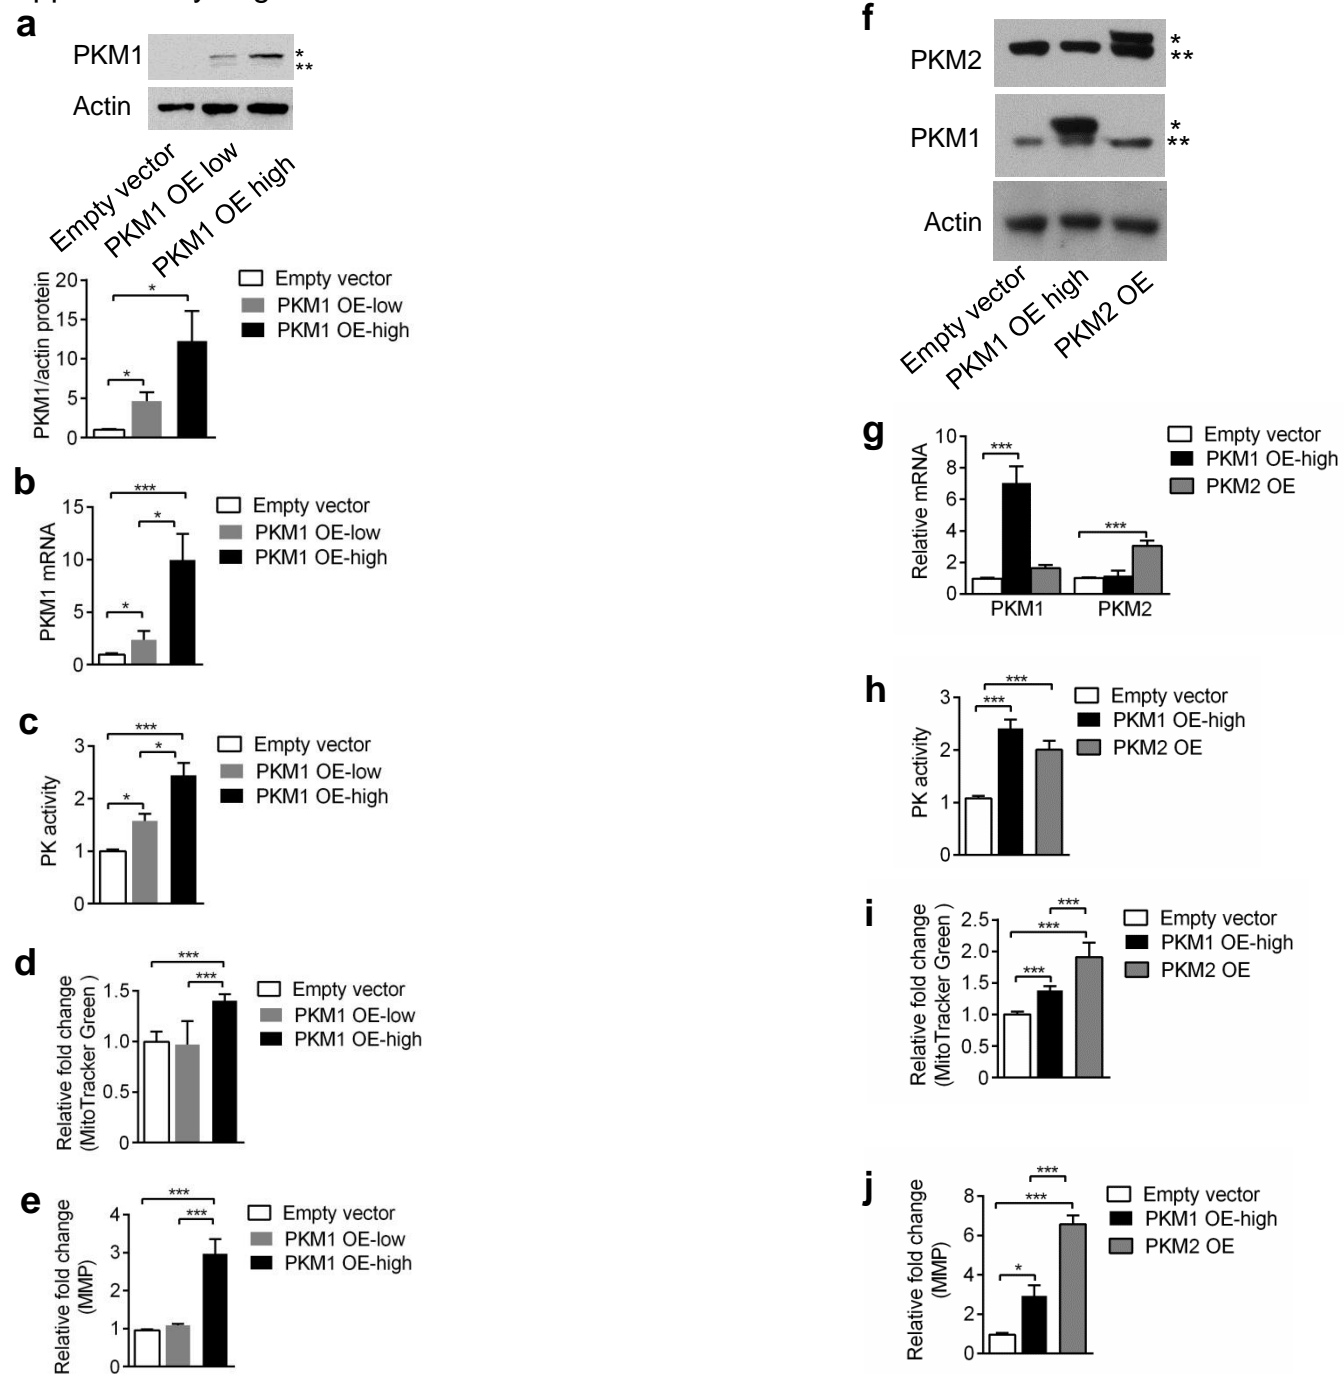

**Supplementary Fig. 7** Differential effects of PKM1 and PKM2 on mitochondrial metabolism (a-e) Podocytes stable cell line overexpressing PKM1 at low (PKM1 OE-low) and high (PKM1 OE-high) levels. Western blotting  $n = 3$  (a); mRNA  $n = 4$  except  $n = 2$  for empty vector (b); PK activity  $n = 3$  (c); mitoTracker Green  $n = 6$  (d) and MMP  $n = 5$  (e) were performed in these cells. (f-j) Podocytes stable cell line overexpressing PKM1 (high) and PKM2. Western blotting (f), mRNA  $n = 4$  (g), PK activity  $n = 8$  (h), mitoTracker Green  $n = 6$  (i) and MMP  $n = 5$  (j) were performed in these cells. Representative blot images were shown. \*, Flag-PKM; \*\* endogenous PKM. All values are means  $\pm$  SEM. Comparison of more than two groups was analyzed using ANOVA. When overall F-tests were significant ( $P < 0.05$ ), post hoc comparisons using Tukey's method of adjustment were conducted to determine the location of any significant pairwise differences. \*\*\* $P < 0.001$ , \* $P < 0.05$ .

Supplementary Fig 8

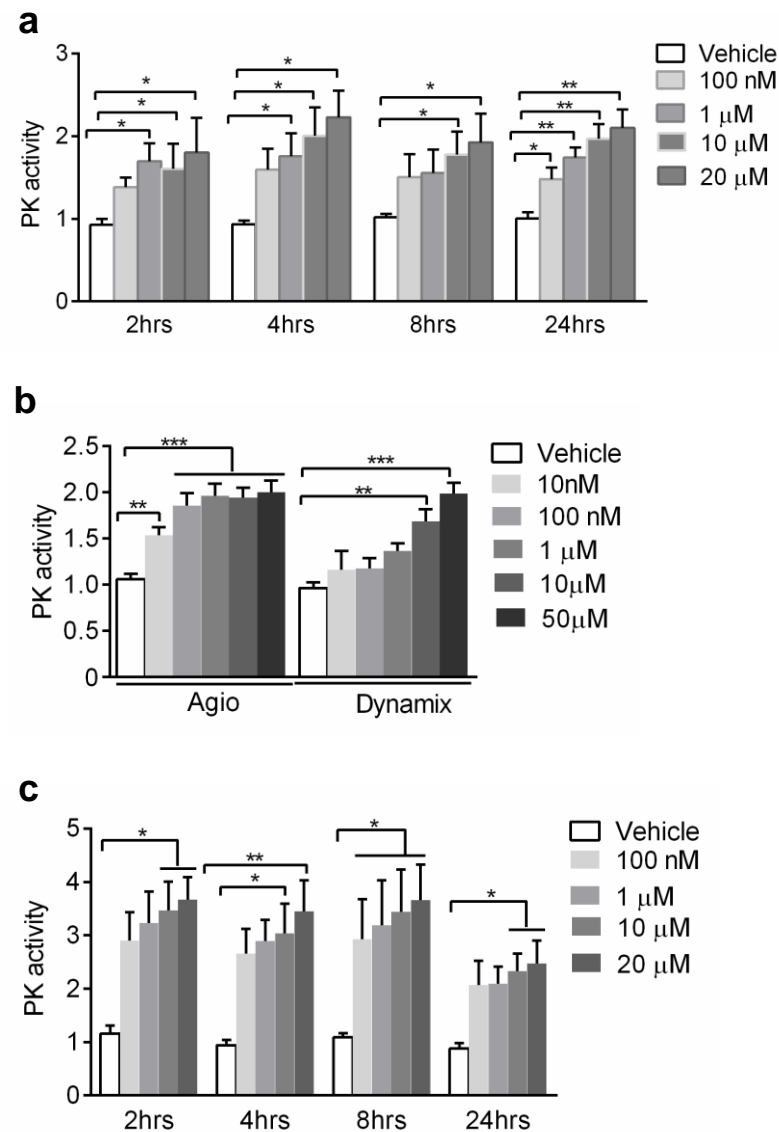

**Supplementary Fig. 8** PK activity in mouse podocytes, proximal tubule cell line (HK-2 cells) and other small molecules of PKM2 activators

(a) PK activity in mouse podocytes treated with TEPP-46 at different concentrations and time points.  $n = 3$  independent experiments.

(b) PK activity in mouse podocytes treated with other PKM2 activators Agio (PKM2 Activator 1020) and Dynamix (SCHEMBL2694519) for 6 hrs with different concentrations.  $n = 5$  independent experiments.

(c) PK activity in HK-2 cells treated with TEPP-46 at different concentrations and time points.  $n = 4$  independent experiments.

All values are means  $\pm$  SEM.  $***P < 0.001$ ,  $**P < 0.005$ ,  $*P < 0.05$  vs. vehicle at the corresponding time point.



Supplementary Fig. 9

**a** MitoTracker Green

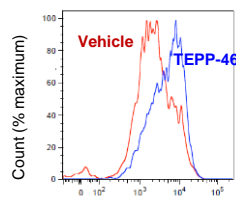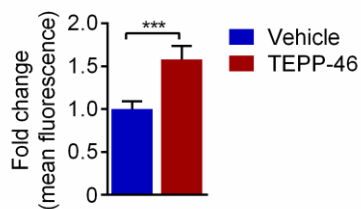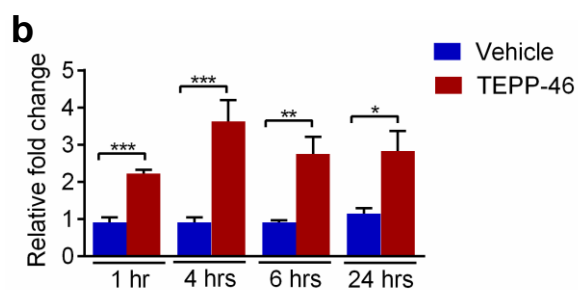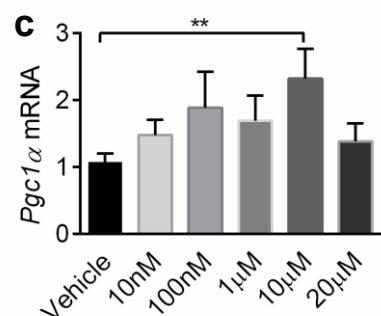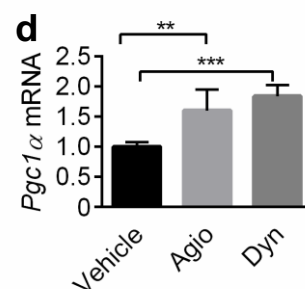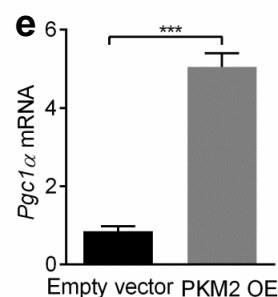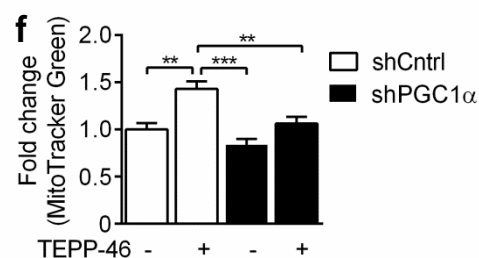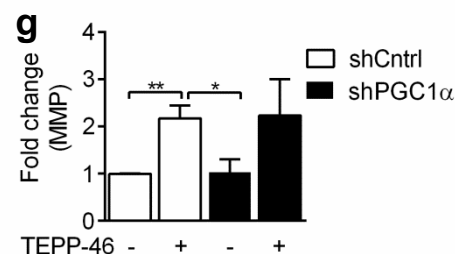

**Supplementary Fig. 9** PKM2 activation on PGC1α expression and mitochondrial metabolism in podocytes. **(a)** Histogram of MitoTracker Green in podocytes treated with 10μM TEPP-46 for 24hrs. Quantification of MitoTracker Green mean fluorescence and the data were expressed as fold change;  $n = 7$  independent experiments. **(b)** MMP at different time points by TEPP-46;  $n = 4$  independent experiments. **(c)** *Pgc1α* mRNA in mouse podocytes treated with TEPP-46 for 8hrs at different concentrations.  $n = 3$  independent experiments. **(d)** *Pgc1α* mRNA in mouse podocytes treated with Vehicle ( $n = 7$ ), other PKM2 activators 10μM Agio ( $n = 4$ ) and Dynamix ( $n = 3$ ) for 6hrs. **(e)** *Pgc1α* mRNA in mouse podocytes stable cell line with either Control (empty vector) or PKM2 overexpressing (PKM2 OE).  $n = 3$  independent experiments. **(f)** MitoTracker Green ( $n = 5$  independent experiments) and **(g)** MMP ( $n = 6$  independent experiments) in podocytes stable cell lines with either scramble shRNA Control or knockdown with shPGC1α treated with +/- 10μM TEPP-46 for 24hrs. All values are means  $\pm$  SEM. For two group comparison, all values are analyzed using unpaired student's t test. Comparison of more than two groups was analyzed using ANOVA. When overall F-tests were significant ( $P < 0.05$ ), post hoc comparisons using Tukey's method of adjustment were conducted to determine the location of any significant pairwise differences. \*\*\* $P < 0.001$ , \*\* $P < 0.005$ , \* $P < 0.05$ .

Supplementary Fig. 10

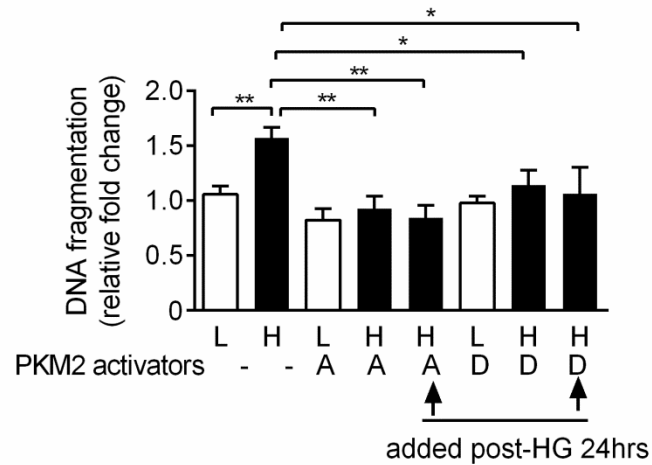

**Supplementary Fig. 10** Other small molecules of PKM2 activators prevented podocytes from apoptosis induced by high glucose

DNA fragmentation in podocytes treated with LG (L) or HG (H) with or without 10 $\mu$ M Agio (A) or Dynamix (D) for 72hrs. Treatment groups with arrows indicated the activators were added post-24hrs HG treatment. Replicates of experiments in each condition are in order  $n = 7, 7, 6, 5, 5, 4, 4,$  and 3. All values are means  $\pm$  SEM. Comparison of more than two groups was analyzed using ANOVA. When overall F-tests were significant ( $P < 0.05$ ), post hoc comparisons using Tukey's method of adjustment were conducted to determine the location of any significant pairwise differences. \*\* $P < 0.005$ ; \*  $P < 0.05$ .

Supplementary Fig.11

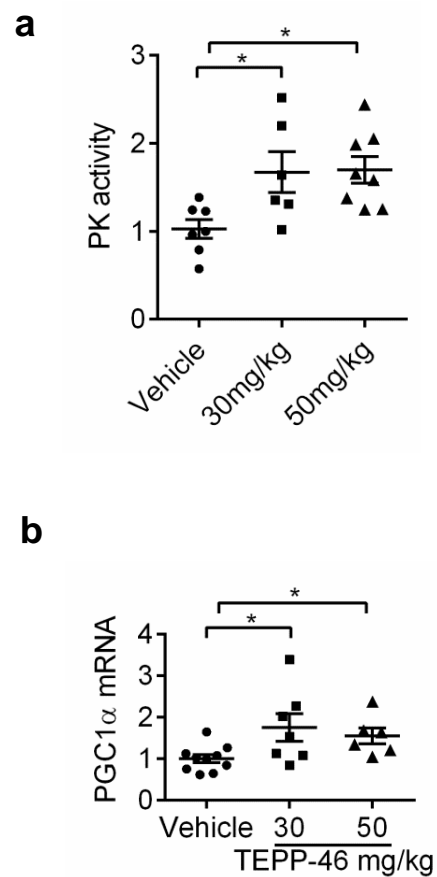

**Supplementary Fig. 11** TEPP-46 increases PK activity and PGC1α expression in DBA/2J mice

(a) DBA/2J mice were orally gavaged vehicle ( $n = 7$  mice), 30 ( $n = 6$  mice) and 50mg/kg ( $n = 8$  mice) TEPP-46 and harvested post-24 hrs. Kidney cortex was collected for the measurement of PK activity.

(b) DBA/2J mice were orally gavaged vehicle, 30 and 50mg/kg TEPP-46 and harvested post-24 hrs. Kidney cortex was collected for Pgc1α mRNA. Vehicle  $n = 10$ , 30mg/kg  $n = 7$ , 50mg/kg  $n = 6$ .

All values are means  $\pm$  SEM. Comparison of more than two groups was analyzed using ANOVA. When overall F-tests were significant ( $P < 0.05$ ), post hoc comparisons using Tukey's method of adjustment were conducted to determine the location of any significant pairwise differences. \*  $P < 0.05$ .

Supplementary Fig.12

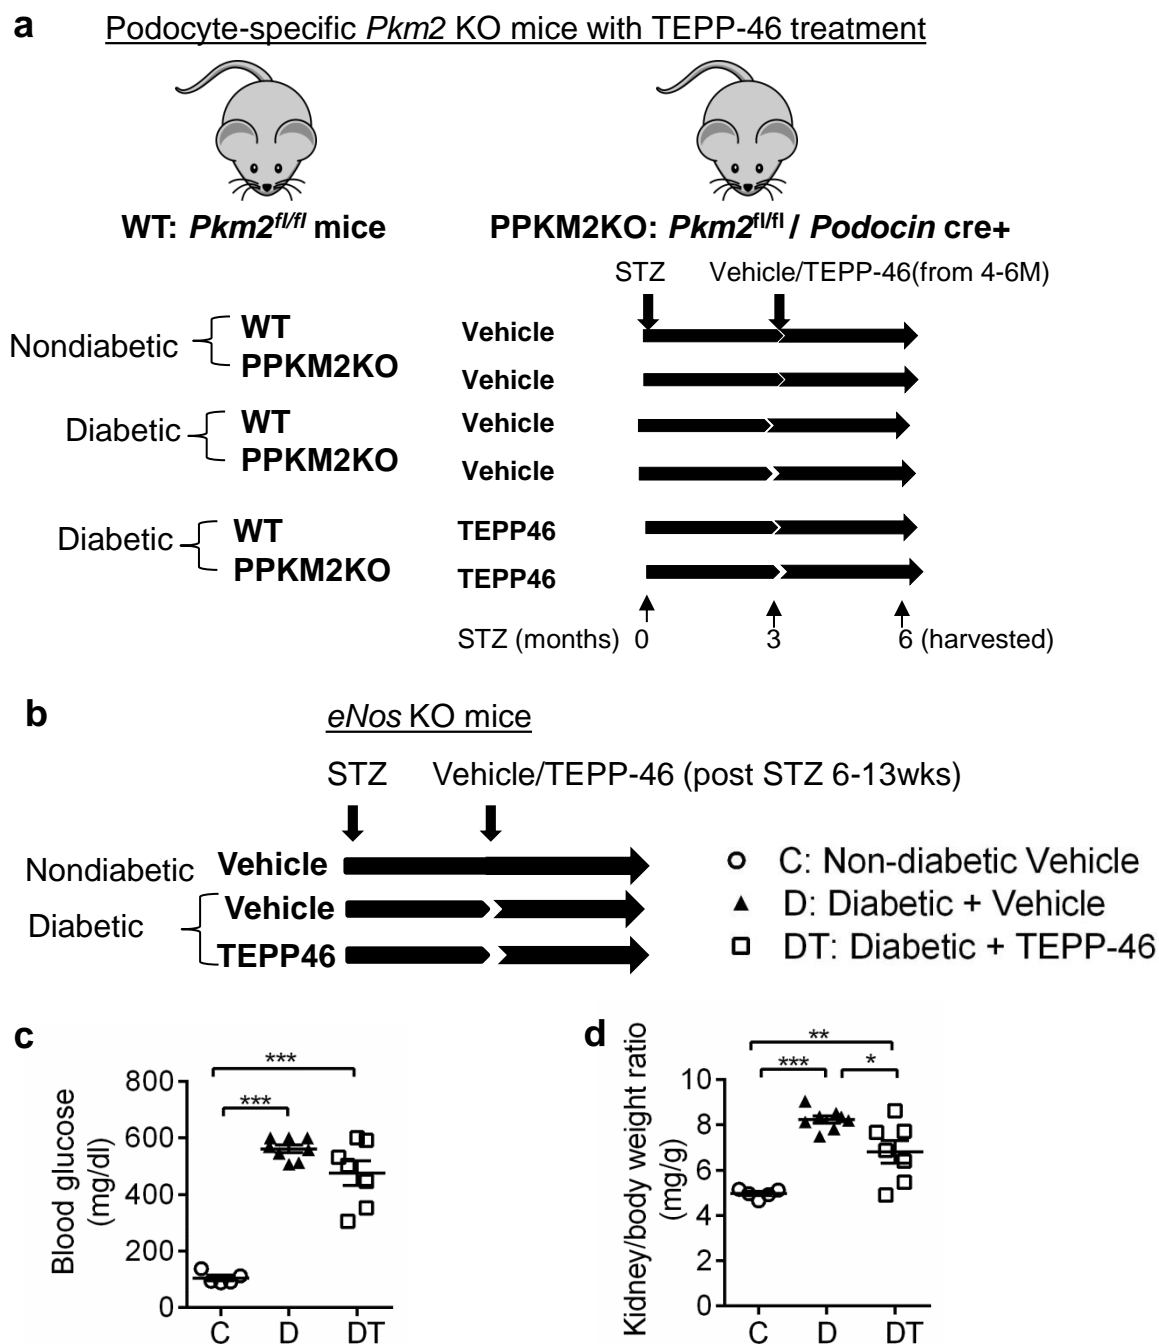

**Supplementary Fig. 12** The effect of TEPP-46 on diabetic PPKM2 KO and diabetic *eNos* KO mice

(a) Schema illustrating study design of TEPP-46 is acting through PKM2-specific manner using podocyte-specific *Pkm2* KO mice; (b) Schema illustrates STZ-induced diabetic *eNOS* mice treated with TEPP-46 post-STZ 6-13 weeks. *eNOS* KO mice were given vehicle or 50mg/kg TEPP-46 daily by oral gavaging for 7 weeks. Mice were harvested post-STZ 13 weeks. (c) Fasting blood glucose and (d) Kidney and body weight ratio. Non-diabetic vehicle,  $n = 5$  mice; diabetic vehicle,  $n = 8$  mice; diabetic TEPP-46,  $n = 7$  mice. All values are means  $\pm$  SEM. All data throughout this Figure were conducted using ANOVA. When overall F-tests were significant ( $P < 0.05$ ), post hoc comparisons using Tukey's method of adjustment were conducted to determine the location of any significant pairwise differences. \*\*\*  $P < 0.001$ , \*\*  $P < 0.005$ , \*  $P < 0.05$ .

Supplementary Fig.13  
(Full blot for Figure 1d)

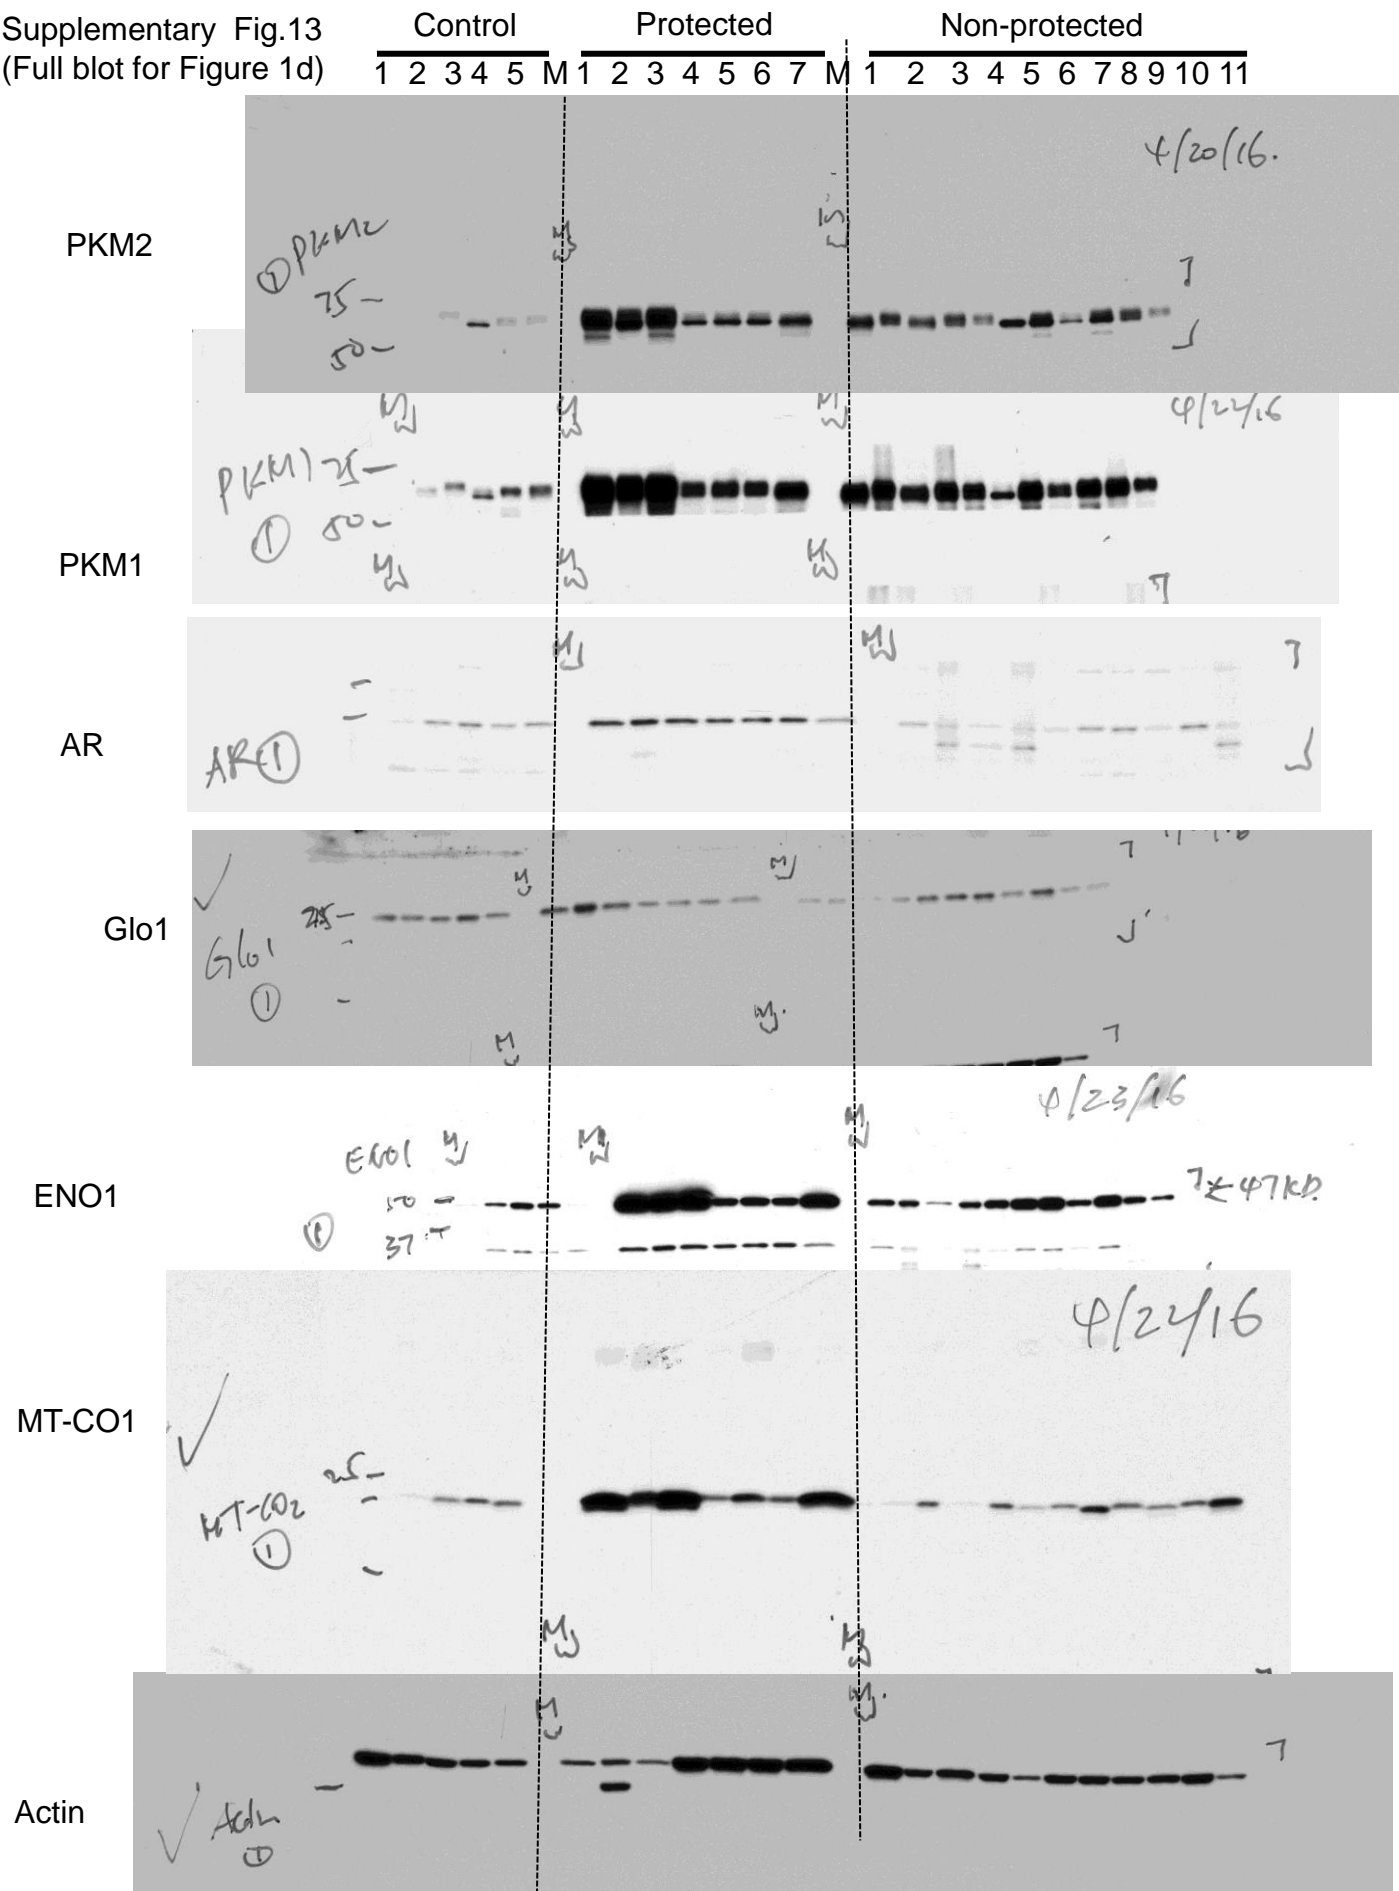

Supplementary Fig.14  
(Full blot for Figure 2d)

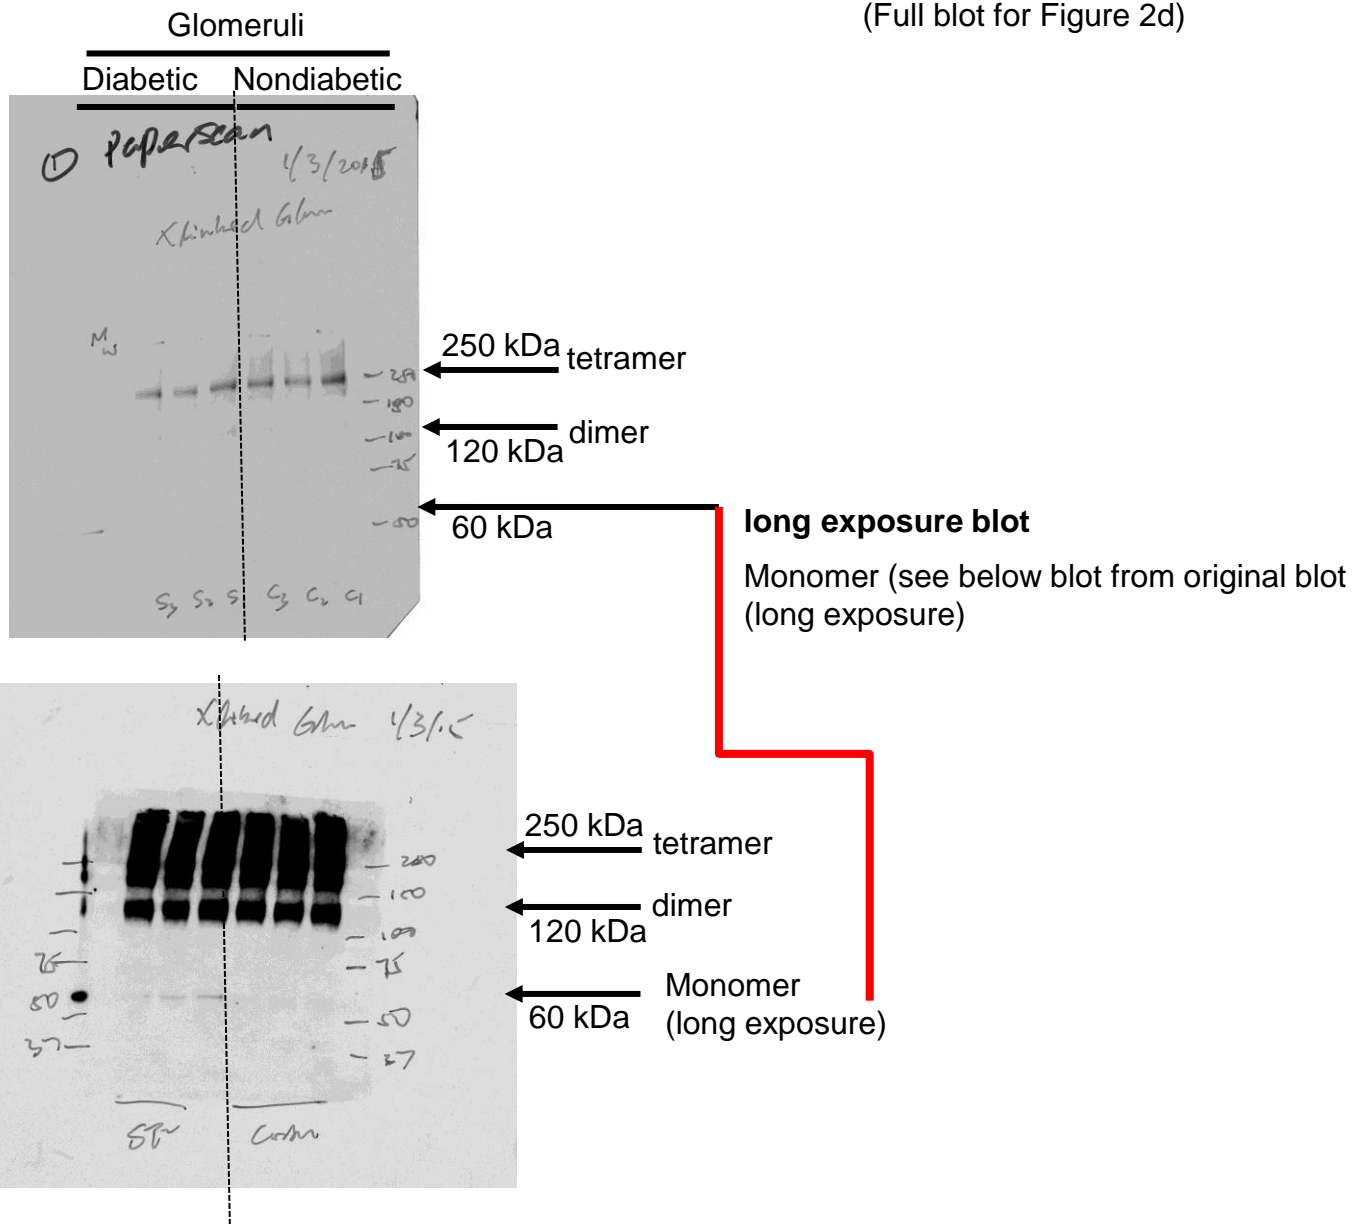

Ponceau S staining

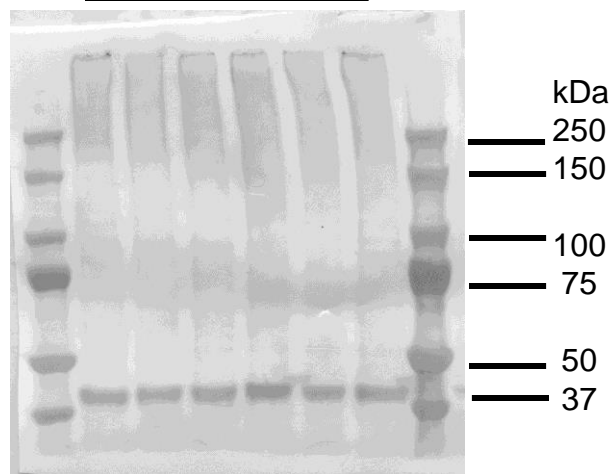

Supplementary Fig.15  
(Full blot for Figure 2e)

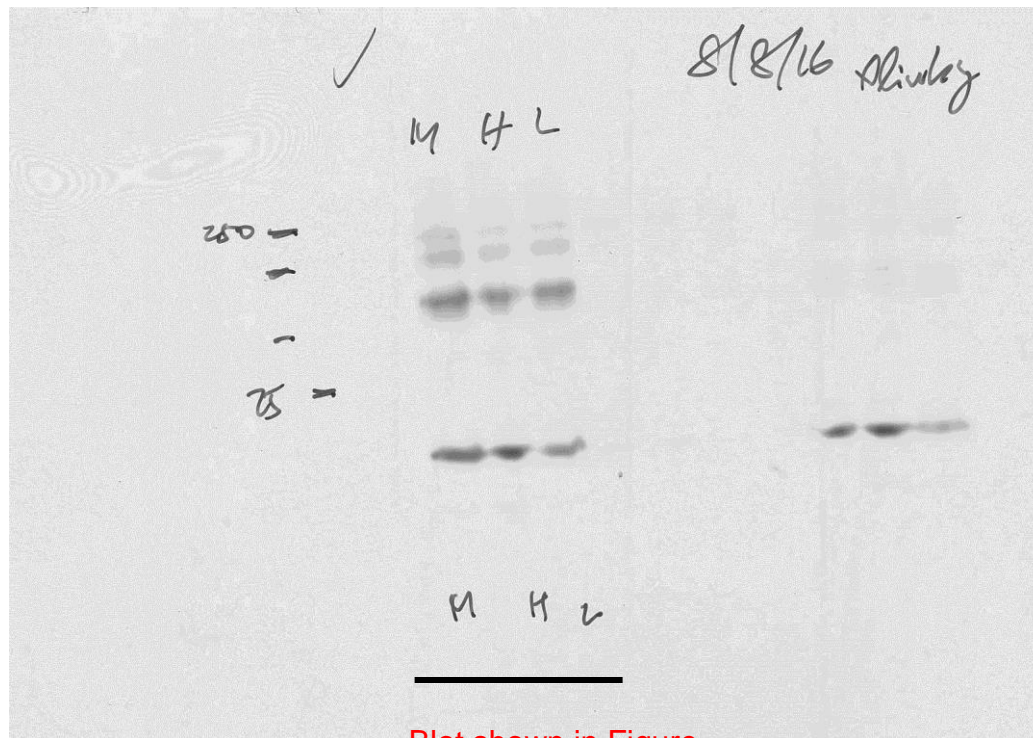

Blot shown in Figure

Supplementary Fig.16  
(Full blot for Figure 2f)

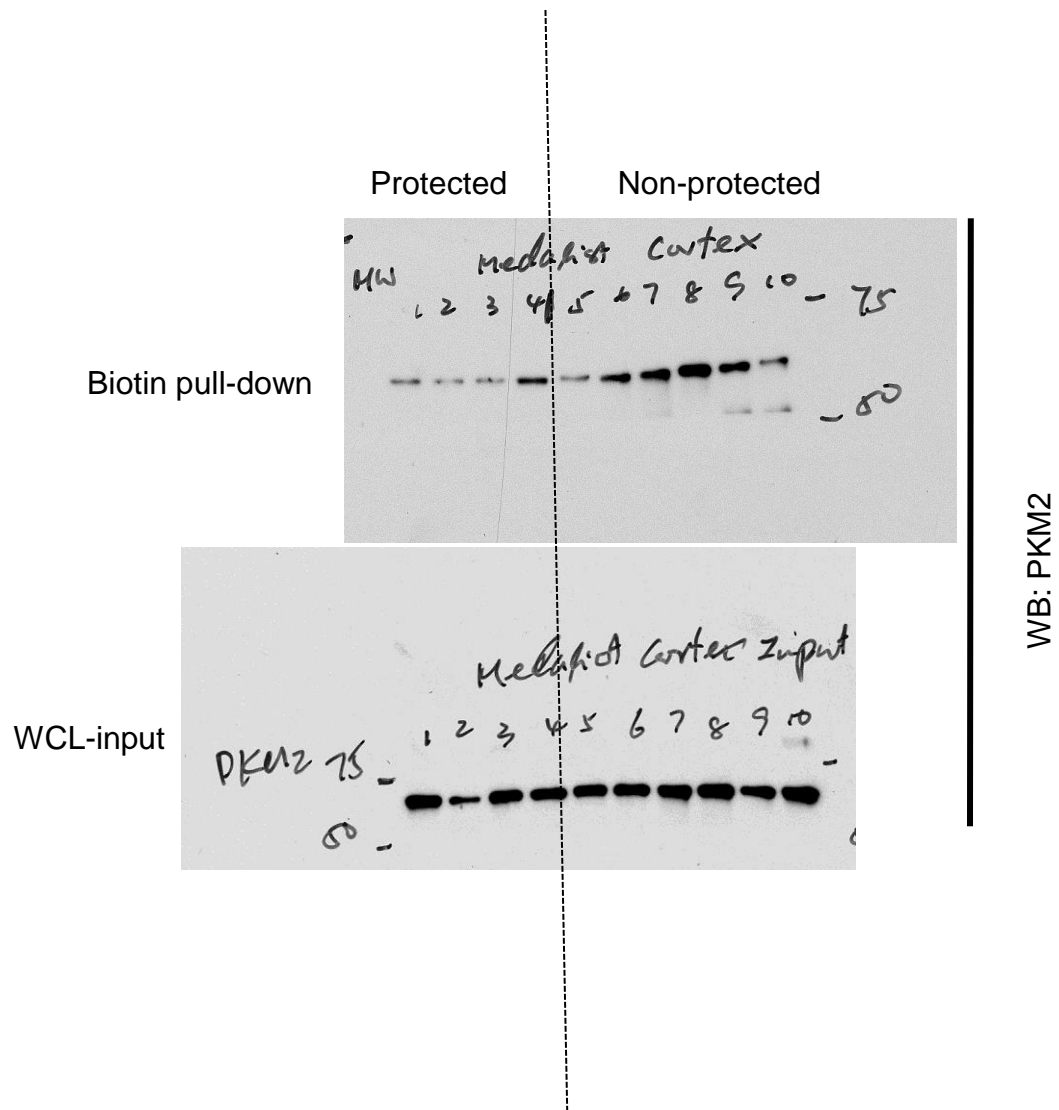



Supplementary Fig.17  
(Full blot for Figure 2g)

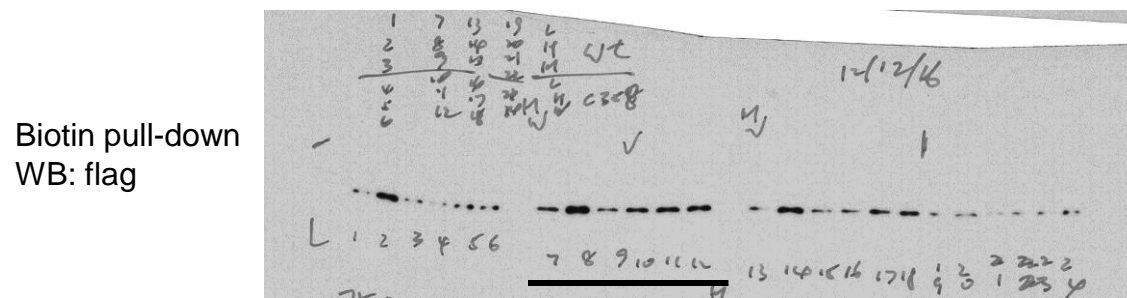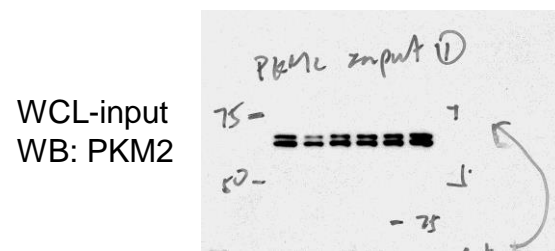

Supplementary Fig.18  
 (Full blot for Figure 3b)

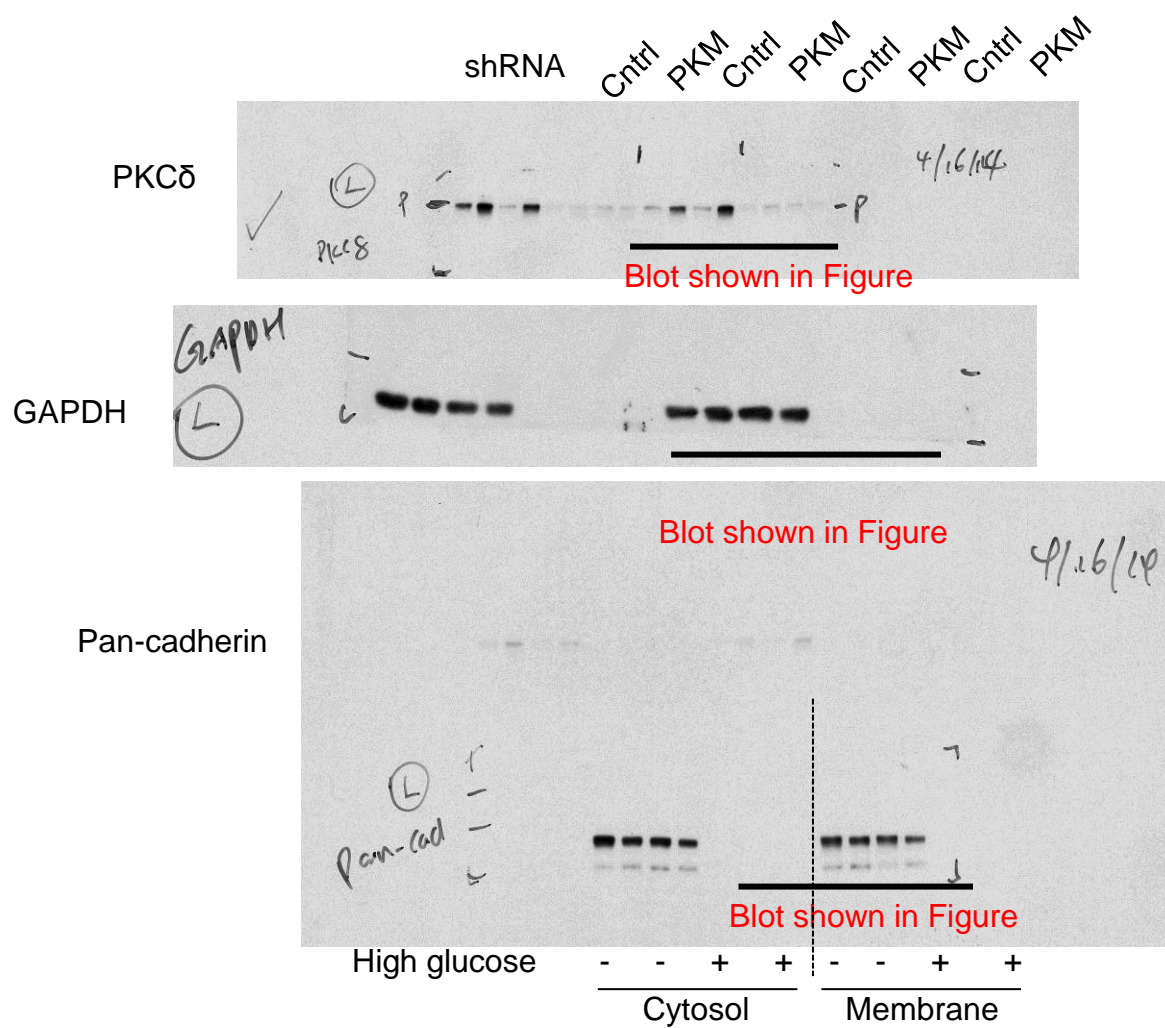

Supplementary Fig.19  
(Full blot for Figure 3f)

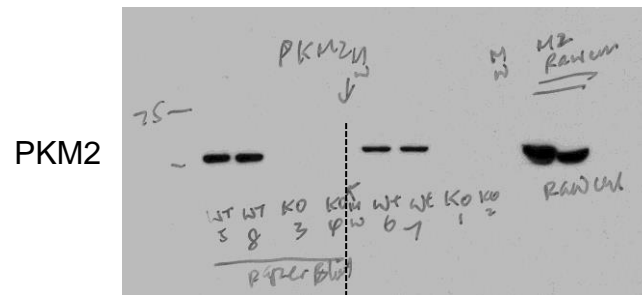

Blot shown in Figure

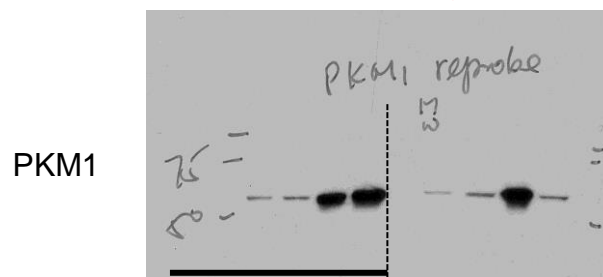

Blot shown in Figure

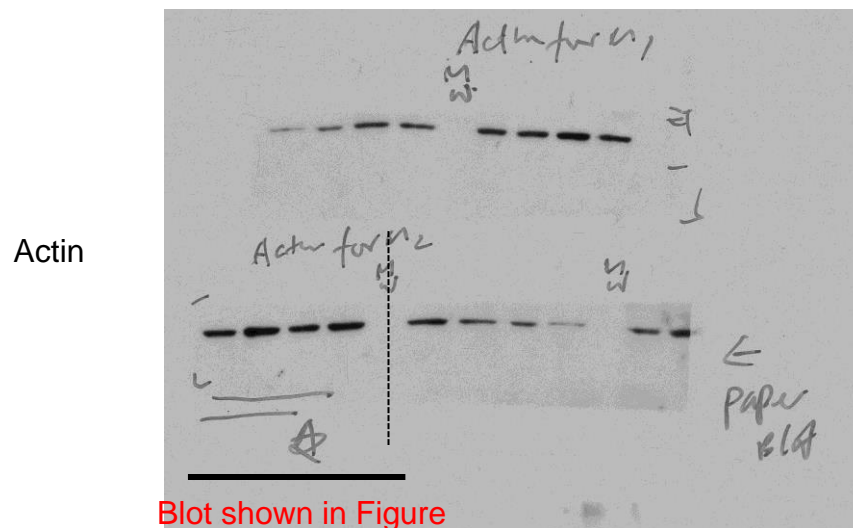

Blot shown in Figure

Supplementary Fig.20  
(Full blot for Figure 4b)

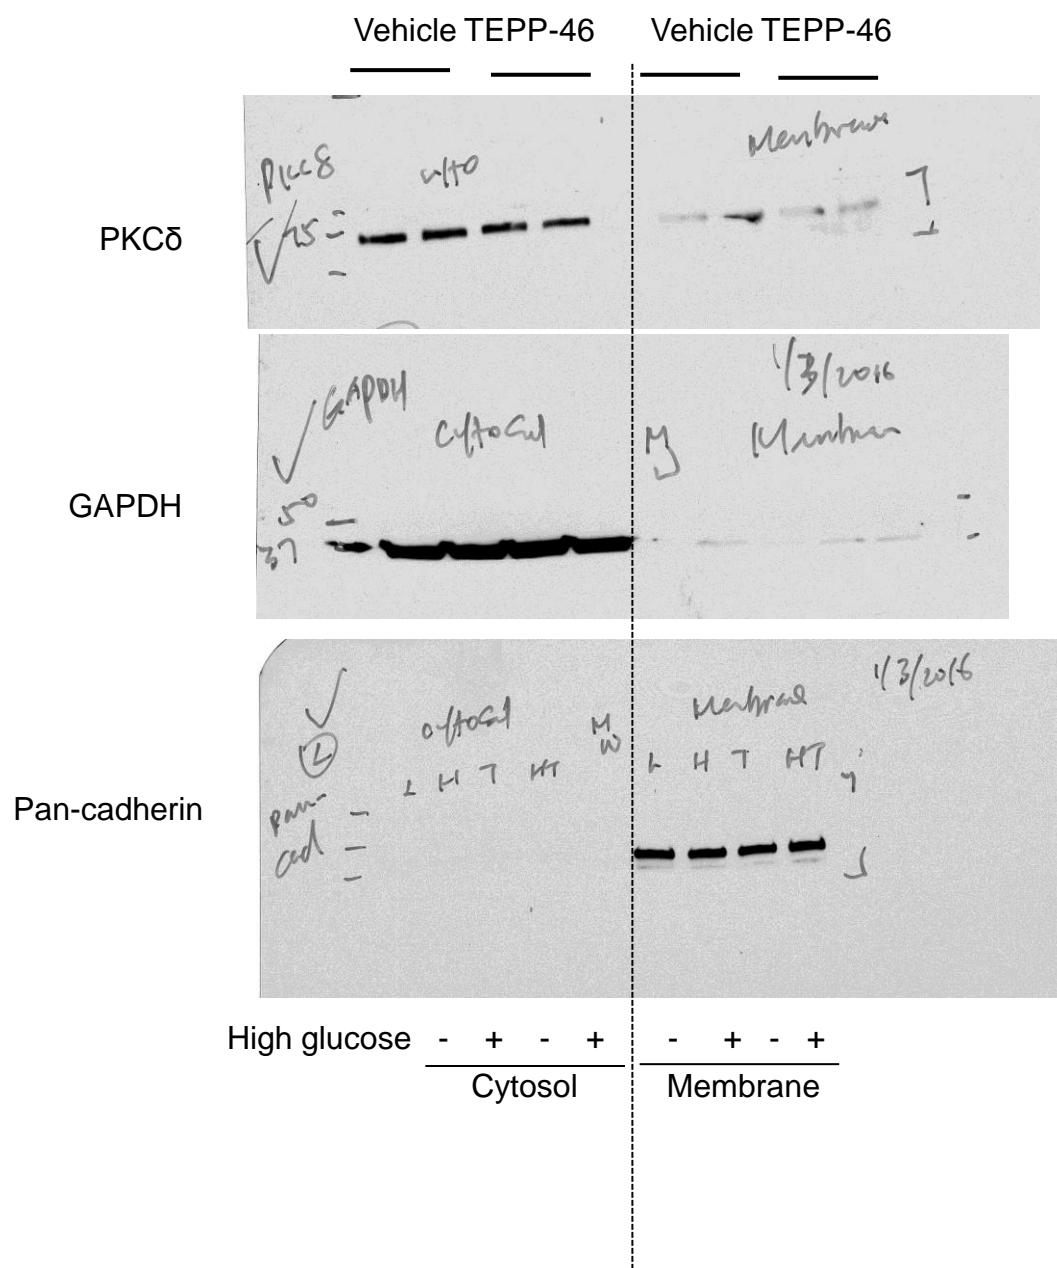

Supplementary Fig.21  
(Full blot for Figure 4m)

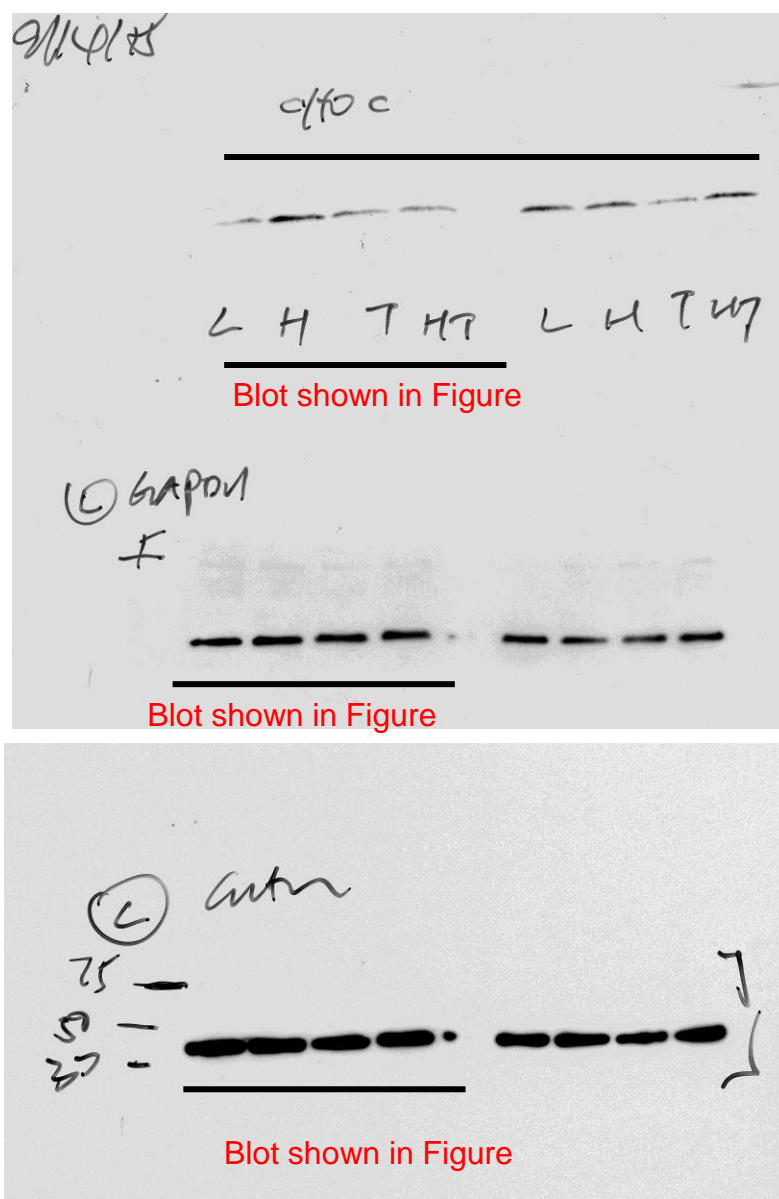

Supplemental Table 1: Clinical characteristics of Joslin Medalists and non-diabetic controls without nephropathy

| Characteristics                      | DN class 0-I (N=7) | DN class IIB-III (N=11) | P value | Non-diabetic Controls (N=5) |
|--------------------------------------|--------------------|-------------------------|---------|-----------------------------|
| Age (yr)                             | 78 (59, 78)        | 80 (71, 85)             | 0.17    | 80 (78, 82)                 |
| Female                               | 2 (28.6%)          | 5 (45.5%)               | 0.64    | 1 (20.0%)                   |
| Duration of Diseases (yr)            | 56 (53, 70)        | 64 (57, 74)             | 0.29    | N/A                         |
| Age at Diagnosis (yr)                | 8 (3, 22)          | 10 (4, 23)              | 0.83    | N/A                         |
| HbA1c (%)                            | 6.9 (6.6, 8.0)     | 7.2 (6.5, 8.1)          | 0.61    | N/A                         |
| Body Mass Index (kg/m <sup>2</sup> ) | 25.8 (23.8, 30.4)  | 27.5 (22.9, 29.0)       | 0.92    | 20.4 (19.1, 23.3)           |
| ACR (μg/mg)                          | 15.9 (5.4, 18.8)   | 45.5 (9.2, 346.0)       | 0.16    | N/A                         |
| eGFR (mL/min/1.73m <sup>2</sup> )    | 72.3 (35.8, 83.3)  | 44.6 (24.8, 54.0)       | 0.03    | N/A                         |
| Serum creatinine (mg/dl)             | 1.0 (0.9, 1.5)     | 1.3 (1.2, 2.1)          | 0.16    | N/A                         |
| Systolic BP (mmHg)                   | 122 (115, 130)     | 138 (118, 160)          | 0.11    | N/A                         |
| Diastolic BP (mmHg)                  | 60 (58, 66)        | 61 (58, 66)             | 0.94    | N/A                         |
| Hypertension                         | 3 (42.9%)          | 8 (72.7%)               | 0.11    | 2 (40.0%)                   |
| Antihypertensive Use                 | 5 (71.4%)          | 9 (81.8%)               | >0.99   | N/A                         |

Values are expressed as n (%) or median (quartile 1, quartile 3). HbA1c, hemoglobin A1c  
 ACR, albumin/creatinine ratio. P values were calculated using t-test or chi-squared test.

Supplemental Table 2: Clinical characteristics of Medalist from proteomics analysis

| SID | Age (years) | Duration (years) | Sex | RPS DN Class | A1c | ACR (µg/mg) | eGFR (mL/min/1.73m <sup>2</sup> ) | IgA                    | IgG                               | Cystatin C (mg/L) | Creatinine (mg/dL) | BUN (mg/dL) |
|-----|-------------|------------------|-----|--------------|-----|-------------|-----------------------------------|------------------------|-----------------------------------|-------------------|--------------------|-------------|
| G15 | 71          | 56               | F   | 0            | 6.7 | 23.90       | 35.8                              | neg                    | neg G but tissue ANA <sup>5</sup> | 1.18              | 1.50               | 40          |
| G3  | 79          | 57               | F   | I            | 7.6 | 5.40        | 32.9                              | neg                    | neg                               | 1.76              | 1.50               | 36          |
| G4  | 78          | 75               | M   | I            | 6.6 | no report   | 41.2                              | neg                    | neg                               | 1.74              | 1.60               | 31          |
| G7  | 59          | 52               | M   | I            | 5.6 | 4.26        | 83.2                              | t-1 M <sup>1</sup>     | neg                               | 0.96              | 1.00               | 12          |
| G19 | 56          | 53               | M   | I            | 8.0 | 13.40       | 95.8                              | neg                    | neg                               | 0.75              | 0.90               | 16          |
| G27 | 78          | 54               | M   | 0            | 6.9 | 18.30       | 83.3                              | neg                    | neg                               | 0.85              | 0.90               | 25          |
| G13 | 78          | 70               | M   | I or IIA     | 8.4 | 18.80       | 72.3                              | 1-2 M <sup>2</sup>     | neg                               | 1.07              | 1.00               | 25          |
| G9  | 71          | 64               | F   | IIB          | 5.7 | 8.50        | 43.2                              | neg                    | neg                               | 1.46              | 1.30               | 51          |
| G12 | 87          | 77               | M   | IIB          | 7.3 | 346.03      | 49.8                              | neg                    | neg                               | 1.37              | 1.30               | 32          |
| G17 | 87          | 85               | M   | IIB          | 6.2 | 72.55       | 54.0                              | 0-trace M <sup>3</sup> | neg                               | 1.31              | 1.20               | 39          |
| G26 | 85          | 57               | M   | IIB          | 6.8 | 9.15        | 55.6                              | 0 - t M <sup>4</sup>   | neg                               | 1.71              | 1.20               | 44          |
| G29 | 66          | 51               | M   | IIB          | 6.5 | 889.00      | 13.7                              | neg                    | neg                               | 2.88              | 4.23               | 84          |
| G24 | 78          | 65               | F   | IIB          | 8.1 | 5.99        | 44.6                              | neg                    | neg                               | 1.84              | 1.20               | 36          |
| G5  | 72          | 68               | F   | III          | 9.8 | no report   | 24.8                              | neg                    | neg                               | 3.03              | 2.00               | 80          |
| G10 | 80          | 57               | M   | III          | 6.9 | 394.00      | 29.5                              | neg                    | neg                               | 1.87              | 2.10               | 49          |
| G18 | 63          | 61               | F   | IIB          | 8.8 | 45.50       | 59.7                              | neg                    | neg                               | 1.05              | 1.00               | 30          |
| G20 | 84          | 54               | M   | III          | 7.2 | no report   | 15.2                              | neg                    | neg                               | 6.24              | 3.48               | 101         |
| G22 | 80          | 74               | F   | III          | 8.0 | 13.00       | 50.3                              | neg                    | neg                               | 1.03              | 1.10               | 18          |

RPS DN class, Renal Pathology Society DN Classification; ACR, albumin creatinine ratio; eGFR, estimated glomerular filtration rate;

BUN, blood urea nitrogen; HTN, hypertension; BP, blood pressure; UNK, unknown.

<sup>1</sup>there is medium level deposition raising the possibility of IgA nephropathy; <sup>2</sup>this patient has IgA nephropathy;

<sup>3</sup>there is low level deposition that is insufficient for the diagnosis of IgA nephropathy

<sup>4</sup>there is low level deposition that is insufficient for the diagnosis of IgA nephropathy;

<sup>5</sup>the nuclei showed IgG staining that suggests that the patient was ANA; M= mesangial staining positive.

| HTN | BP (mmHg) | Hypertension drugs |
|-----|-----------|--------------------|
| No  | 114/58    | Yes                |
| Yes | 126/60    | Yes                |
| Yes | 118/58    | Yes                |
| No  | 130/60    | Yes                |
| No  | 115/72    | Yes                |
| No  | 138/66    | No                 |
| No  | 122/58    | No                 |
| Yes | 156/56    | Yes                |
| Yes | UNK       | Yes                |
| UNK | UNK       | Yes                |
| Yes | 120/60    | Yes                |
| Yes | 152/80    | Yes                |
| No  | 114/42    | Yes                |
| Yes | 164/62    | Yes                |
| Yes | 190/70    | Yes                |
| Yes | 116/62    | Yes                |
| UNK | UNK       | No                 |
| Yes | 124/59    | No                 |

Supplemental Table 2



Supplementary Table 3: Up-regulated proteins in the glomeruli from Joslin Medalist Protected vs. Non-protected

| <b>Protein Name</b>                                                     | <b>Fold change</b> | <b>p value</b> |
|-------------------------------------------------------------------------|--------------------|----------------|
| HPRT1 Uncharacterized protein HPRT1                                     | 1.98               | 0.0001         |
| PSMA3 Isoform 1 of Proteasome subunit alpha type-3                      | 2.13               | 0.0010         |
| LHPP Phospholysine phosphohistidine inorganic pyrophosphate phosphatase | 1.51               | 0.0016         |
| SOD1 Superoxide dismutase                                               | 2.59               | 0.0018         |
| FGB Fibrinogen beta chain precursor                                     | 3.97               | 0.0020         |
| TPI1 Isoform 1 of Triosephosphate isomerase                             | 2.32               | 0.0024         |
| SORD Sorbitol dehydrogenase                                             | 3.16               | 0.0029         |
| NDUFB9 NADH-ubiquinone oxidoreductase B22 subunit                       | 1.61               | 0.0031         |
| SELENBP1 54 kDa protein                                                 | 2.18               | 0.0032         |
| GSTO1 Glutathione S-transferase omega 1                                 | 1.73               | 0.0036         |
| ALDOA 45 kDa protein                                                    | 2.45               | 0.0042         |
| GAPDH Glyceraldehyde-3-phosphate dehydrogenase                          | 2.51               | 0.0043         |
| ESD 28 kDa protein                                                      | 2.12               | 0.0053         |
| PSMB4 Proteasome subunit beta type-4 precursor                          | 1.77               | 0.0054         |
| GOT1 Aspartate aminotransferase, cytoplasmic                            | 2.41               | 0.0057         |
| PEBP1 Phosphatidylethanolamine-binding protein 1                        | 3.33               | 0.0057         |
| AHCY Adenosylhomocysteinase                                             | 2.13               | 0.0061         |
| ACY3 Aspartoacylase-2                                                   | 1.71               | 0.0062         |
| DPYS Dihydropyrimidinase                                                | 2.31               | 0.0062         |
| UGDH UDP-glucose 6-dehydrogenase                                        | 2.11               | 0.0069         |
| AKR1B1 Aldose reductase                                                 | 1.79               | 0.0072         |
| FGG 50 kDa protein                                                      | 2.92               | 0.0075         |
| GDI2 Rab GDP dissociation inhibitor beta                                | 1.91               | 0.0075         |
| MT-CO2 Cytochrome c oxidase subunit 2                                   | 2.06               | 0.0075         |
| PKM2 Isoform M2 of Pyruvate kinase isozymes M1/M2                       | 2.69               | 0.0086         |
| VCP Transitional endoplasmic reticulum ATPase                           | 1.77               | 0.0096         |
| ENO1 Isoform alpha-enolase of Alpha-enolase                             | 2.82               | 0.0098         |
| PGM1 65 kDa protein                                                     | 2.23               | 0.0102         |
| MDH1 Malate dehydrogenase, cytoplasmic                                  | 2.46               | 0.0110         |
| PSMA1 Isoform Short of Proteasome subunit alpha type-1                  | 1.79               | 0.0119         |
| NP Purine nucleoside phosphorylase                                      | 2.02               | 0.0126         |
| CRYL1 Lambda-crystallin homolog                                         | 2.23               | 0.0132         |
| A2M Alpha-2-macroglobulin precursor                                     | 3.51               | 0.0142         |
| GLO1 Lactoylglutathione lyase                                           | 1.95               | 0.0148         |
| DPYSL2 Dihydropyrimidinase-related protein 2                            | 2.78               | 0.0150         |
| TOMM40 Isoform 2 of Mitochondrial import receptor subunit TOM40 homolog | 1.55               | 0.0153         |
| NPEPPS Puromycin-sensitive aminopeptidase                               | 2.49               | 0.0156         |
| PSMB1 Proteasome subunit beta type-1 precursor                          | 1.69               | 0.0160         |
| BHMT Betaine--homocysteine S-methyltransferase 1                        | 4.79               | 0.0161         |
| LDHB L-lactate dehydrogenase B chain                                    | 2.45               | 0.0164         |
| TXN Thioredoxin                                                         | 1.72               | 0.0175         |
| QPRT 34 kDa protein                                                     | 2.44               | 0.0177         |
| SPR Sepiapterin reductase                                               | 1.62               | 0.0181         |
| CD9 CD9 antigen                                                         | 1.64               | 0.0198         |

|                                                                       |      |        |
|-----------------------------------------------------------------------|------|--------|
| HP Haptoglobin precursor                                              | 3.65 | 0.0203 |
| TALDO1 Transaldolase                                                  | 1.72 | 0.0207 |
| CA2 Carbonic anhydrase 2                                              | 1.85 | 0.0209 |
| MSN Uncharacterized protein MSN (Fragment)                            | 1.69 | 0.0209 |
| Rheumatoid factor C6 light chain (Fragment)                           | 1.83 | 0.0214 |
| ADH5 Alcohol dehydrogenase class-3                                    | 1.57 | 0.0214 |
| PSMB2 Proteasome subunit beta type-2                                  | 1.66 | 0.0218 |
| APEH Acylamino-acid-releasing enzyme                                  | 1.78 | 0.0224 |
| HEBP1 Heme-binding protein 1                                          | 1.56 | 0.0224 |
| HAGH Hydroxyacylglutathione hydrolase                                 | 2.20 | 0.0226 |
| APOA1BP Isoform 2 of Apolipoprotein A-I-binding protein precursor     | 1.51 | 0.0227 |
| SERPING1 Plasma protease C1 inhibitor precursor                       | 2.49 | 0.0252 |
| LL22NC03-5H6.5 UPF0530 protein                                        | 1.65 | 0.0254 |
| ALAD Delta-aminolevulinic acid dehydratase                            | 1.64 | 0.0256 |
| PGD 56 kDa protein                                                    | 1.78 | 0.0257 |
| PSME1 Proteasome activator complex subunit 1                          | 1.64 | 0.0260 |
| PRDX6 Peroxiredoxin-6                                                 | 1.81 | 0.0261 |
| ALDOB Fructose-bisphosphate aldolase B                                | 3.40 | 0.0265 |
| C22orf32 Similar to Cullin-associated NEDD8-dissociated protein 1     | 2.19 | 0.0267 |
| GSTT1 Glutathione S-transferase theta 1                               | 2.70 | 0.0268 |
| FAH 33 kDa protein                                                    | 2.02 | 0.0273 |
| PGLS 6-phosphogluconolactonase                                        | 1.57 | 0.0292 |
| NIT2 33 kDa protein                                                   | 1.75 | 0.0303 |
| CRYM Mu-crystallin homolog                                            | 1.65 | 0.0316 |
| UGP2 Isoform 1 of UTP--glucose-1-phosphate uridylyltransferase        | 1.75 | 0.0321 |
| FBP1 Fructose-1,6-bisphosphatase 1                                    | 1.91 | 0.0330 |
| ACY1 Aminoacylase-1                                                   | 2.60 | 0.0332 |
| CP Ceruloplasmin precursor                                            | 3.16 | 0.0337 |
| ORM1 orosomucoid 1 precursor                                          | 3.76 | 0.0340 |
| GLRX Glutaredoxin-1                                                   | 1.62 | 0.0340 |
| SET Isoform 1 of Protein SET                                          | 1.59 | 0.0352 |
| ACO1 Cytoplasmic aconitate hydratase                                  | 2.97 | 0.0352 |
| GLOD4 Isoform 2 of Glyoxalase domain-containing protein 4             | 1.69 | 0.0353 |
| LTB4DH NADP-dependent leukotriene B4 12-hydroxydehydrogenase          | 1.71 | 0.0365 |
| GRHPR GRHPR protein (Fragment)                                        | 1.62 | 0.0368 |
| TF Serotransferrin precursor                                          | 3.43 | 0.0370 |
| GSTP1 Glutathione S-transferase P                                     | 1.82 | 0.0371 |
| PEPD Uncharacterized protein PEPD (Fragment)                          | 2.44 | 0.0393 |
| GATM Isoform Cytoplasmic of Glycine amidinotransferase, mitochondrial | 1.81 | 0.0416 |
| FGA Isoform 2 of Fibrinogen alpha chain precursor                     | 4.87 | 0.0447 |
| NQO2 32 kDa protein                                                   | 1.88 | 0.0449 |
| CALB1 Calbindin                                                       | 4.29 | 0.0472 |
| PBLD Phenazine biosynthesis-like domain-containing protein            | 3.16 | 0.0473 |
| C11orf54 Isoform 2 of Ester hydrolase C11orf54                        | 2.50 | 0.0499 |

Joslin Medalist with no DN (n=7, Protected) vs. DN (n=11, Non-protected).

Values are expressed as fold change and p value was calculated using Mann–Whitney U test.

The data are sorted by P value using  $p < 0.05$  and fold change  $\geq 1.5$  cut off

Supplementary Table 4: Up-regulated proteins in the glomeruli from Joslin Medalist Protected vs. Non-protected Joslin Medalist with no DN (n=7, Protected) vs. DN (n=11, Non-protected) Values are expressed as fold change and P value was calculated using Mann–Whitney U test The data are sorted by P value for all upregulated proteins.

| Protein Name                                                            | Accession   | Fold change | P value |
|-------------------------------------------------------------------------|-------------|-------------|---------|
| HPRT1 Uncharacterized protein HPRT1                                     | IPI00873466 | 1.98        | 0.0001  |
| PSMA3 Isoform 1 of Proteasome subunit alpha type-3                      | IPI00419249 | 2.13        | 0.0010  |
| LHPP Phospholysine phosphohistidine inorganic pyrophosphate phosphatase | IPI00005474 | 1.51        | 0.0016  |
| SOD1 Superoxide dismutase                                               | IPI00218733 | 2.59        | 0.0018  |
| FGB Fibrinogen beta chain precursor                                     | IPI00298497 | 3.97        | 0.0020  |
| TPI1 Isoform 1 of Triosephosphate isomerase                             | IPI00465028 | 2.32        | 0.0024  |
| SORD Sorbitol dehydrogenase                                             | IPI00216057 | 3.16        | 0.0029  |
| NDUFB9 NADH-ubiquinone oxidoreductase B22 subunit                       | IPI00790752 | 1.61        | 0.0031  |
| SELENBP1 54 kDa protein                                                 | IPI00745729 | 2.18        | 0.0032  |
| GSTO1 Glutathione S-transferase omega 1                                 | IPI00642936 | 1.73        | 0.0036  |
| ALDOA 45 kDa protein                                                    | IPI00796333 | 2.45        | 0.0042  |
| GAPDH Glyceraldehyde-3-phosphate dehydrogenase                          | IPI00219018 | 2.51        | 0.0043  |
| ESD 28 kDa protein                                                      | IPI00641040 | 2.12        | 0.0053  |
| PSMB4 Proteasome subunit beta type-4 precursor                          | IPI00555956 | 1.77        | 0.0054  |
| GOT1 Aspartate aminotransferase, cytoplasmic                            | IPI00219029 | 2.41        | 0.0057  |
| PEBP1 Phosphatidylethanolamine-binding protein 1                        | IPI00219446 | 3.33        | 0.0057  |
| AHCY Adenosylhomocysteinase                                             | IPI00012007 | 2.13        | 0.0061  |
| ACY3 Aspartoacylase-2                                                   | IPI00063025 | 1.71        | 0.0062  |
| HAO3 3-hydroxyanthranilate 3,4-dioxygenase                              | IPI00009375 | 1.46        | 0.0062  |
| ECE1 Isoform D of Endothelin-converting enzyme 1                        | IPI00216762 | 1.34        | 0.0062  |
| HEBP2 HEBP2 protein (Fragment)                                          | IPI00644697 | 1.31        | 0.0062  |
| DPYS Dihydropyrimidinase                                                | IPI00028910 | 2.31        | 0.0062  |
| UGDH UDP-glucose 6-dehydrogenase                                        | IPI00031420 | 2.11        | 0.0069  |
| AKR1B1 Aldose reductase                                                 | IPI00413641 | 1.79        | 0.0072  |
| FGG 50 kDa protein                                                      | IPI00877792 | 2.92        | 0.0075  |
| GDI2 Rab GDP dissociation inhibitor beta                                | IPI00031461 | 1.91        | 0.0075  |
| MT-CO2 Cytochrome c oxidase subunit 2                                   | IPI00017510 | 2.06        | 0.0075  |
| PKM2 Isoform M2 of Pyruvate kinase isozymes M1/M2                       | IPI00479186 | 2.69        | 0.0086  |
| VCP Transitional endoplasmic reticulum ATPase                           | IPI00022774 | 1.77        | 0.0096  |
| ENO1 Isoform alpha-enolase of Alpha-enolase                             | IPI00465248 | 2.82        | 0.0098  |
| PGM1 65 kDa protein                                                     | IPI00844159 | 2.23        | 0.0102  |
| MDH1 Malate dehydrogenase, cytoplasmic                                  | IPI00291005 | 2.46        | 0.0110  |
| PSMA1 Isoform Short of Proteasome subunit alpha type-1                  | IPI00016832 | 1.79        | 0.0119  |
| NP Purine nucleoside phosphorylase                                      | IPI00871140 | 2.02        | 0.0126  |
| CRYL1 Lambda-crystallin homolog                                         | IPI00006443 | 2.23        | 0.0132  |
| A2M Alpha-2-macroglobulin precursor                                     | IPI00478003 | 3.51        | 0.0142  |
| GLO1 Lactoylglutathione lyase                                           | IPI00220766 | 1.95        | 0.0148  |
| DPYSL2 Dihydropyrimidinase-related protein 2                            | IPI00257508 | 2.78        | 0.0150  |
| TOMM40 Isoform 2 of Mitochondrial import receptor subunit TOM40 homolog | IPI00376117 | 1.55        | 0.0153  |
| NPEPPS Puromycin-sensitive aminopeptidase                               | IPI00026216 | 2.49        | 0.0156  |
| PSMB1 Proteasome subunit beta type-1 precursor                          | IPI00025019 | 1.69        | 0.0160  |
| BHMT Betaine--homocysteine S-methyltransferase 1                        | IPI00004101 | 4.79        | 0.0161  |
| LDHB L-lactate dehydrogenase B chain                                    | IPI00219217 | 2.45        | 0.0164  |
| TXN Thioredoxin                                                         | IPI00552768 | 1.72        | 0.0175  |
| QPRT 34 kDa protein                                                     | IPI00872692 | 2.44        | 0.0177  |
| SPR Sepiapterin reductase                                               | IPI00017469 | 1.62        | 0.0181  |

|                                                                             |             |      |        |
|-----------------------------------------------------------------------------|-------------|------|--------|
| CAPZB cDNA FLJ60094, highly similar to F-actin capping protein subunit beta | IPI00218782 | 1.51 | 0.0194 |
| CD9 CD9 antigen                                                             | IPI00215997 | 1.64 | 0.0198 |
| HP Haptoglobin precursor                                                    | IPI00641737 | 3.65 | 0.0203 |
| TALDO1 Transaldolase                                                        | IPI00744692 | 1.72 | 0.0207 |
| XYLT1 Xylosyltransferase 1                                                  | IPI00183487 | 1.17 | 0.0208 |
| LYPLA1 Isoform 2 of Acyl-protein thioesterase 1                             | IPI00398727 | 1.17 | 0.0208 |
| CA2 Carbonic anhydrase 2                                                    | IPI00218414 | 1.85 | 0.0209 |
| MSN Uncharacterized protein MSN (Fragment)                                  | IPI00872814 | 1.69 | 0.0209 |
| ALDH16A1 Isoform 1 of Aldehyde dehydrogenase family 16 member A1            | IPI00217920 | 1.40 | 0.0213 |
| BPNT1 Isoform 1 of 3(2),5-bisphosphate nucleotidase 1                       | IPI00410214 | 1.37 | 0.0213 |
| ACMSD Isoform 1 of 2-amino-3-carboxymuconate-6-semialdehyde decarboxylase   | IPI00152656 | 1.23 | 0.0213 |
| GLTP Glycolipid transfer protein                                            | IPI00184363 | 1.23 | 0.0213 |
| - Rheumatoid factor C6 light chain (Fragment)                               | IPI00829956 | 1.83 | 0.0214 |
| ADH5 Alcohol dehydrogenase class-3                                          | IPI00746777 | 1.57 | 0.0214 |
| FDPS Putative uncharacterized protein                                       | IPI00101405 | 1.26 | 0.0214 |
| PSMB2 Proteasome subunit beta type-2                                        | IPI00028006 | 1.66 | 0.0218 |
| APEH Acylamino-acid-releasing enzyme                                        | IPI00337741 | 1.78 | 0.0224 |
| HEBP1 Heme-binding protein 1                                                | IPI00148063 | 1.56 | 0.0224 |
| HAGH Hydroxyacylglutathione hydrolase                                       | IPI00745553 | 2.20 | 0.0226 |
| APOA1BP Isoform 2 of Apolipoprotein A-I-binding protein precursor           | IPI00848298 | 1.51 | 0.0227 |
| DIABLO Isoform 2 of Diablo homolog, mitochondrial precursor                 | IPI00219865 | 1.46 | 0.0233 |
| SERPING1 Plasma protease C1 inhibitor precursor                             | IPI00291866 | 2.49 | 0.0252 |
| EIF6 Eukaryotic translation initiation factor 6                             | IPI00010105 | 1.38 | 0.0253 |
| LL22NC03-5H6.5 UPF0530 protein                                              | IPI00550644 | 1.65 | 0.0254 |
| ALAD Delta-aminolevulinic acid dehydratase                                  | IPI00790373 | 1.64 | 0.0256 |
| PGD 56 kDa protein                                                          | IPI00747533 | 1.78 | 0.0257 |
| PSME1 Proteasome activator complex subunit 1                                | IPI00479722 | 1.64 | 0.0260 |
| PRDX6 Peroxiredoxin-6                                                       | IPI00220301 | 1.81 | 0.0261 |
| ALDOB Fructose-bisphosphate aldolase B                                      | IPI00218407 | 3.40 | 0.0265 |
| C22orf32 Similar to Cullin-associated NEDD8-dissociated protein 1           | IPI00746694 | 2.19 | 0.0267 |
| GSTT1 Glutathione S-transferase theta 1                                     | IPI00893316 | 2.70 | 0.0268 |
| FAH 33 kDa protein                                                          | IPI00793664 | 2.02 | 0.0273 |
| PGLS 6-phosphogluconolactonase                                              | IPI00029997 | 1.57 | 0.0292 |
| S100A9 Protein S100-A9                                                      | IPI00027462 | 1.38 | 0.0292 |
| GPI Glucose-6-phosphate isomerase                                           | IPI00027497 | 1.34 | 0.0295 |
| NIT2 33 kDa protein                                                         | IPI00872668 | 1.75 | 0.0303 |
| CRYM Mu-crystallin homolog                                                  | IPI00000949 | 1.65 | 0.0316 |
| HSPA4 Heat shock 70 kDa protein 4                                           | IPI00002966 | 1.48 | 0.0320 |
| UGP2 Isoform 1 of UTP--glucose-1-phosphate uridylyltransferase              | IPI00329331 | 1.75 | 0.0321 |
| FBP1 Fructose-1,6-bisphosphatase 1                                          | IPI00073772 | 1.91 | 0.0330 |
| ACY1 Aminoacylase-1                                                         | IPI00009268 | 2.60 | 0.0332 |
| - Rheumatoid factor D5 light chain (Fragment)                               | IPI00816799 | 1.39 | 0.0334 |
| CP Ceruloplasmin precursor                                                  | IPI00017601 | 3.16 | 0.0337 |
| ORM1 orosomuroid 1 precursor                                                | IPI00884926 | 3.76 | 0.0340 |
| GLRX Glutaredoxin-1                                                         | IPI00219025 | 1.62 | 0.0340 |
| SET Isoform 1 of Protein SET                                                | IPI00072377 | 1.59 | 0.0352 |
| ACO1 Cytoplasmic aconitate hydratase                                        | IPI00008485 | 2.97 | 0.0352 |
| GLOD4 Isoform 2 of Glyoxalase domain-containing protein 4                   | IPI00745272 | 1.69 | 0.0353 |
| LTB4DH NADP-dependent leukotriene B4 12-hydroxydehydrogenase                | IPI00292657 | 1.71 | 0.0365 |
| GRHPR GRHPR protein (Fragment)                                              | IPI00550682 | 1.62 | 0.0368 |
| TF Serotransferrin precursor                                                | IPI00022463 | 3.43 | 0.0370 |
| GSTP1 Glutathione S-transferase P                                           | IPI00219757 | 1.82 | 0.0371 |

|                                                                                                   |             |      |        |
|---------------------------------------------------------------------------------------------------|-------------|------|--------|
| PEPD Uncharacterized protein PEPD (Fragment)                                                      | IPI00872063 | 2.44 | 0.0393 |
| DCI Isoform 2 of 3,2-trans-enoyl-CoA isomerase, mitochondrial precursor                           | IPI00398758 | 1.44 | 0.0400 |
| GATM Isoform Cytoplasmic of Glycine amidinotransferase, mitochondrial                             | IPI00216279 | 1.81 | 0.0416 |
| RPSA 16 kDa protein                                                                               | IPI00790580 | 1.45 | 0.0426 |
| PPP1R7 Isoform 1 of Protein phosphatase 1 regulatory subunit 7                                    | IPI00033600 | 1.28 | 0.0440 |
| FGA Isoform 2 of Fibrinogen alpha chain precursor                                                 | IPI00029717 | 4.87 | 0.0447 |
| NQO2 32 kDa protein                                                                               | IPI00871850 | 1.88 | 0.0449 |
| PNPO 19 kDa protein                                                                               | IPI00793232 | 1.47 | 0.0449 |
| ALDH9A1 4-trimethylaminobutyraldehyde dehydrogenase                                               | IPI00873817 | 1.44 | 0.0459 |
| CALB1 Calbindin                                                                                   | IPI00220361 | 4.29 | 0.0472 |
| PBLD Phenazine biosynthesis-like domain-containing protein                                        | IPI00024896 | 3.16 | 0.0473 |
| C11orf54 Isoform 2 of Ester hydrolase C11orf54                                                    | IPI00761072 | 2.50 | 0.0499 |
| ALDH7A1 aldehyde dehydrogenase 7 family, member A1                                                | IPI00221234 | 1.73 | 0.0513 |
| PGK1 Phosphoglycerate kinase 1                                                                    | IPI00169383 | 1.68 | 0.0514 |
| PSMB5 Proteasome subunit beta type-5 precursor                                                    | IPI00479306 | 1.43 | 0.0516 |
| ALDH1L2 Isoform 3 of Probable 10-formyltetrahydrofolate dehydrogenase ALDH1L2                     | IPI00878818 | 1.38 | 0.0518 |
| DDAH1 N(G),N(G)-dimethylarginine dimethylaminohydrolase 1                                         | IPI00220342 | 1.84 | 0.0522 |
| HIBCH 46 kDa protein                                                                              | IPI00874185 | 1.70 | 0.0565 |
| NME2 Nucleoside diphosphate kinase                                                                | IPI00604590 | 1.41 | 0.0569 |
| CNDP2 Cytosolic non-specific dipeptidase                                                          | IPI00177728 | 2.33 | 0.0571 |
| SOD2 manganese superoxide dismutase isoform A precursor                                           | IPI00847322 | 1.58 | 0.0571 |
| PSMA5 Proteasome subunit alpha type-5                                                             | IPI00291922 | 1.52 | 0.0571 |
| GPX1 glutathione peroxidase 1 isoform 1                                                           | IPI00293975 | 1.81 | 0.0578 |
| LDHD Isoform 1 of Probable D-lactate dehydrogenase, mitochondrial precursor                       | IPI00329133 | 1.25 | 0.0586 |
| SLC9A3R1 Ezrin-radixin-moesin-binding phosphoprotein 50                                           | IPI00003527 | 1.96 | 0.0628 |
| FH Isoform Cytoplasmic of Fumarate hydratase, mitochondrial precursor                             | IPI00759715 | 1.62 | 0.0631 |
| ACO2 Aconitase 2, mitochondrial                                                                   | IPI00790739 | 1.80 | 0.0634 |
| DPP3;BBS1 Isoform 1 of Dipeptidyl-peptidase 3                                                     | IPI00020672 | 1.42 | 0.0635 |
| PLS3 plastin 3                                                                                    | IPI00216694 | 1.84 | 0.0648 |
| GDA Guanine deaminase                                                                             | IPI00465184 | 2.04 | 0.0657 |
| GLDC 115 kDa protein                                                                              | IPI00295388 | 1.72 | 0.0657 |
| RPL13 60S ribosomal protein L13                                                                   | IPI00465361 | 1.47 | 0.0665 |
| HDDC3 Isoform 1 of HD domain-containing protein 3                                                 | IPI00789618 | 1.23 | 0.0676 |
| ME3 NADP-dependent malic enzyme, mitochondrial                                                    | IPI00003970 | 1.17 | 0.0676 |
| NARS Asparaginyl-tRNA synthetase, cytoplasmic                                                     | IPI00306960 | 1.11 | 0.0676 |
| COQ7 20 kDa protein                                                                               | IPI00645720 | 1.11 | 0.0676 |
| ASXL2 154 kDa protein                                                                             | IPI00873208 | 1.11 | 0.0676 |
| ESAM Endothelial cell-selective adhesion molecule                                                 | IPI00303161 | 2.06 | 0.0681 |
| - Similar to V1-17 protein                                                                        | IPI00887169 | 1.54 | 0.0681 |
| - Extracellular signal-regulated kinase-2 splice variant                                          | IPI00874012 | 1.46 | 0.0681 |
| RPL26 Uncharacterized protein RPL26                                                               | IPI00433834 | 1.43 | 0.0681 |
| - cDNA FLJ55703, highly similar to Solute carrier family 2, facilitated glucose transporter membe | IPI00909237 | 1.40 | 0.0681 |
| GK Isoform 3 of Glycerol kinase                                                                   | IPI00216067 | 1.37 | 0.0681 |
| - Ig kappa chain V-III region NG9 (Fragment)                                                      | IPI00387116 | 1.34 | 0.0681 |
| TSN Translin                                                                                      | IPI00018768 | 1.31 | 0.0681 |
| FABP4 Fatty acid-binding protein, adipocyte                                                       | IPI00215746 | 1.31 | 0.0681 |
| RPL23 Similar to ribosomal protein L23                                                            | IPI00795408 | 1.31 | 0.0681 |
| - Cryocryoglobulin CC2 lambda light chain variable region (Fragment)                              | IPI00890733 | 1.31 | 0.0681 |
| - Uncharacterized protein USMG5P1                                                                 | IPI00640630 | 1.26 | 0.0681 |
| - Complement factor B                                                                             | IPI00893864 | 1.26 | 0.0681 |
| PITPNA Phosphatidylinositol transfer protein alpha isoform                                        | IPI00216048 | 1.23 | 0.0681 |
| ITIH2 Inter-alpha (Globulin) inhibitor H2                                                         | IPI00645038 | 1.23 | 0.0681 |

|                                                                                             |             |      |        |
|---------------------------------------------------------------------------------------------|-------------|------|--------|
| PRPS1 Ribose-phosphate pyrophosphokinase (Fragment)                                         | IPI00816572 | 1.23 | 0.0681 |
| SLC36A2 Isoform 1 of Proton-coupled amino acid transporter 2                                | IPI00376258 | 1.20 | 0.0681 |
| GMPR2 GMPR2 protein                                                                         | IPI00449197 | 1.20 | 0.0681 |
| KNG1 Kininogen 1                                                                            | IPI00797833 | 1.20 | 0.0681 |
| PA2G4 PA2G4 protein (Fragment)                                                              | IPI00807557 | 1.20 | 0.0681 |
| RPL4 60S ribosomal protein L4                                                               | IPI00003918 | 1.17 | 0.0681 |
| TFG Protein TFG                                                                             | IPI00294619 | 1.17 | 0.0681 |
| MLYCD Isoform Cytoplasmic+peroxisomal of Malonyl-CoA decarboxylase, mitochondrial           | IPI00759655 | 1.17 | 0.0681 |
| NCKAP1 NCK-associated protein 1 isoform 2                                                   | IPI00409684 | 1.14 | 0.0681 |
| NIF3L1 Isoform 2 of NIF3-like protein 1                                                     | IPI00873590 | 1.14 | 0.0681 |
| GPD1 Glycerol-3-phosphate dehydrogenase [NAD+], cytoplasmic                                 | IPI00295777 | 2.97 | 0.0684 |
| GOT2 Aspartate aminotransferase, mitochondrial precursor                                    | IPI00018206 | 1.45 | 0.0692 |
| TKT Transketolase variant (Fragment)                                                        | IPI00788802 | 1.45 | 0.0695 |
| C7orf24 Uncharacterized protein C7orf24                                                     | IPI00031564 | 1.44 | 0.0711 |
| TP53I3 Isoform 1 of Putative quinone oxidoreductase                                         | IPI00384643 | 1.35 | 0.0711 |
| ACP1 Acid phosphatase 1, soluble                                                            | IPI00893203 | 1.68 | 0.0714 |
| NAPRT1 Isoform 3 of Nicotinate phosphoribosyltransferase                                    | IPI00880164 | 1.29 | 0.0730 |
| QDPR Dihydropteridine reductase                                                             | IPI00014439 | 2.10 | 0.0734 |
| BDH2 Isoform 1 of 3-hydroxybutyrate dehydrogenase type 2                                    | IPI00607799 | 2.86 | 0.0740 |
| TMED4 Transmembrane emp24 domain-containing protein 4                                       | IPI00296259 | 1.45 | 0.0747 |
| STIP1 Stress-induced-phosphoprotein 1                                                       | IPI00013894 | 1.39 | 0.0749 |
| ATP6V1E1 Vacuolar proton pump subunit E 1                                                   | IPI00003856 | 1.75 | 0.0769 |
| ALDH1L1 Formyltetrahydrofolate dehydrogenase isoform a variant                              | IPI00793673 | 1.56 | 0.0769 |
| CS 48 kDa protein                                                                           | IPI00793839 | 1.48 | 0.0769 |
| PSMA7 Isoform 1 of Proteasome subunit alpha type-7                                          | IPI00024175 | 1.44 | 0.0782 |
| GSR Isoform Cytoplasmic of Glutathione reductase, mitochondrial precursor                   | IPI00759575 | 1.38 | 0.0785 |
| NDRG1 Protein NDRG1                                                                         | IPI00022078 | 2.05 | 0.0791 |
| KRAS Isoform 2B of GTPase KRas precursor                                                    | IPI00423570 | 1.43 | 0.0821 |
| CMBL Carboxymethylenebutenolidase homolog                                                   | IPI00383046 | 1.94 | 0.0874 |
| SRI sorcin isoform b                                                                        | IPI00414264 | 1.50 | 0.0879 |
| DLAT Dihydrolipoyllysine-residue acetyltransferase component of pyruvate dehydrogenase com  | IPI00021338 | 1.36 | 0.0887 |
| HPD 40 kDa protein                                                                          | IPI00795913 | 2.29 | 0.0902 |
| PFN1 Profilin-1                                                                             | IPI00216691 | 1.43 | 0.0911 |
| FAHD2A Fumarylacetoacetate hydrolase domain-containing protein 2A                           | IPI00329742 | 1.21 | 0.0919 |
| TPP2 Tripeptidyl peptidase II                                                               | IPI00640197 | 1.21 | 0.0919 |
| FAHD1 Fumarylacetoacetate hydrolase domain containing 1                                     | IPI00604759 | 1.56 | 0.0925 |
| SLC23A1 Isoform 1 of Solute carrier family 23 member 1                                      | IPI00303368 | 1.47 | 0.0932 |
| RENBP N-acylglucosamine 2-epimerase                                                         | IPI00796170 | 1.38 | 0.0932 |
| ITGA5 Integrin alpha-5                                                                      | IPI00306604 | 1.31 | 0.0932 |
| NDUFB10 NADH dehydrogenase [ubiquinone] 1 beta subcomplex subunit 10                        | IPI00479905 | 1.47 | 0.0935 |
| DCXR 26 kDa protein                                                                         | IPI00797917 | 1.91 | 0.0937 |
| ACAT1 Acetyl-CoA acetyltransferase, mitochondrial precursor                                 | IPI00030363 | 1.66 | 0.0937 |
| MME Nephilysin                                                                              | IPI00247063 | 1.43 | 0.0937 |
| PRDX3 peroxiredoxin 3 isoform b                                                             | IPI00374151 | 1.39 | 0.0937 |
| ALB Isoform 1 of Serum albumin precursor                                                    | IPI00745872 | 1.75 | 0.0938 |
| PTER Phosphotriesterase-related protein                                                     | IPI00100933 | 1.48 | 0.0989 |
| EPHX1 Epoxide hydrolase 1                                                                   | IPI00009896 | 1.32 | 0.1022 |
| ETFB Isoform 1 of Electron transfer flavoprotein subunit beta                               | IPI00004902 | 1.46 | 0.1025 |
| ABAT 4-aminobutyrate aminotransferase, mitochondrial precursor                              | IPI00009532 | 1.61 | 0.1027 |
| TAGLN2 21 kDa protein                                                                       | IPI00644531 | 1.56 | 0.1027 |
| C10orf65 Isoform 1 of Dihydrodipicolinate synthase-like, mitochondrial precursor            | IPI00642544 | 1.28 | 0.1042 |
| SLC44A2 cDNA FLJ14613 fis, clone NT2RP1001113, highly similar to Choline transporter-like p | IPI00645589 | 1.46 | 0.1051 |

|                                                                                                 |             |      |        |
|-------------------------------------------------------------------------------------------------|-------------|------|--------|
| FABP1 FABP1 protein (Fragment)                                                                  | IPI00010290 | 3.38 | 0.1061 |
| RPL35 60S ribosomal protein L35                                                                 | IPI00412607 | 1.49 | 0.1093 |
| PSMA6 Proteasome subunit alpha type-6                                                           | IPI00029623 | 1.34 | 0.1104 |
| HSPE1 10 kDa heat shock protein, mitochondrial                                                  | IPI00220362 | 1.67 | 0.1105 |
| FTH1 Ferritin heavy chain                                                                       | IPI00554521 | 1.34 | 0.1108 |
| PSMA2 Proteasome subunit alpha type-2                                                           | IPI00219622 | 1.49 | 0.1117 |
| HRSP12 Ribonuclease UK114                                                                       | IPI00005038 | 1.72 | 0.1119 |
| HIBADH 3-hydroxyisobutyrate dehydrogenase, mitochondrial precursor                              | IPI00013860 | 1.36 | 0.1126 |
| MTAP S-methyl-5-thioadenosine phosphorylase                                                     | IPI00011876 | 1.30 | 0.1197 |
| ASL 58 kDa protein                                                                              | IPI00872756 | 1.39 | 0.1201 |
| CPNE2 Copine II                                                                                 | IPI00645310 | 1.37 | 0.1201 |
| GNPDA1 Glucosamine-6-phosphate isomerase                                                        | IPI00009305 | 1.33 | 0.1203 |
| GC vitamin D-binding protein precursor                                                          | IPI00742696 | 1.85 | 0.1218 |
| ITIH4 Isoform 1 of Inter-alpha-trypsin inhibitor heavy chain H4 precursor                       | IPI00294193 | 2.38 | 0.1221 |
| SLC6A19 Sodium-dependent neutral amino acid transporter B                                       | IPI00456145 | 1.69 | 0.1221 |
| DECR1 2,4-dienoyl-CoA reductase, mitochondrial precursor                                        | IPI00003482 | 1.38 | 0.1231 |
| ETFA Electron transfer flavoprotein subunit alpha, mitochondrial precursor                      | IPI00010810 | 1.41 | 0.1233 |
| ATP5H Isoform 1 of ATP synthase subunit d, mitochondrial                                        | IPI00220487 | 1.33 | 0.1235 |
| FECH Ferrochelatase                                                                             | IPI00645429 | 1.45 | 0.1266 |
| NACA nascent polypeptide-associated complex alpha subunit isoform a                             | IPI00797126 | 1.30 | 0.1299 |
| PSMB3 Proteasome subunit beta type-3                                                            | IPI00028004 | 1.45 | 0.1323 |
| HPX Hemopexin precursor                                                                         | IPI00022488 | 2.33 | 0.1350 |
| ATP1B1 Isoform 2 of Sodium/potassium-transporting ATPase subunit beta-1                         | IPI00871221 | 1.38 | 0.1450 |
| FTL Ferritin light chain                                                                        | IPI00738499 | 1.21 | 0.1465 |
| LAP3 Isoform 2 of Cytosol aminopeptidase                                                        | IPI00789806 | 1.86 | 0.1467 |
| TAGLN Transgelin                                                                                | IPI00216138 | 2.20 | 0.1469 |
| DMGDH Dimethylglycine dehydrogenase, mitochondrial precursor                                    | IPI00296196 | 1.76 | 0.1469 |
| CAT Catalase                                                                                    | IPI00465436 | 1.32 | 0.1469 |
| CAPN2 Uncharacterized protein CAPN2                                                             | IPI00872686 | 1.55 | 0.1470 |
| GALM Aldose 1-epimerase                                                                         | IPI00060200 | 1.60 | 0.1472 |
| SERPINB1 Leukocyte elastase inhibitor                                                           | IPI00027444 | 1.86 | 0.1491 |
| DDAH2 N(G),N(G)-dimethylarginine dimethylaminohydrolase 2                                       | IPI00000760 | 1.35 | 0.1516 |
| - Proteasome (Prosome, macropain) subunit, beta type, 9                                         | IPI00894395 | 1.41 | 0.1519 |
| MYH11 smooth muscle myosin heavy chain 11 isoform SM1B                                          | IPI00743857 | 1.25 | 0.1523 |
| PAFAH1B2 Platelet-activating factor acetylhydrolase IB subunit beta                             | IPI00026546 | 1.16 | 0.1523 |
| HDGF Hepatoma-derived growth factor                                                             | IPI00020956 | 1.18 | 0.1527 |
| PEF1 Peflin                                                                                     | IPI00018235 | 1.15 | 0.1527 |
| GARS Glycyl-tRNA synthetase                                                                     | IPI00783097 | 1.15 | 0.1527 |
| CEACAM1 Biliary glycoprotein                                                                    | IPI00385428 | 1.15 | 0.1527 |
| EPHX2 Epoxide hydrolase 2                                                                       | IPI00104341 | 1.76 | 0.1576 |
| SDHALP1 28 kDa protein                                                                          | IPI00789678 | 1.43 | 0.1593 |
| DLST Dihydrolypoyllysine-residue succinyltransferase component of 2- oxoglutarate dehydrogenase | IPI00420108 | 1.43 | 0.1600 |
| ECH1 Delta(3,5)-Delta(2,4)-dienoyl-CoA isomerase, mitochondrial precursor                       | IPI00011416 | 1.26 | 0.1600 |
| TPM4 Isoform 1 of Tropomyosin alpha-4 chain                                                     | IPI00010779 | 1.53 | 0.1604 |
| LCP1 Plastin-2                                                                                  | IPI00010471 | 1.24 | 0.1605 |
| C6orf108 c-Myc-responsive protein Rcl                                                           | IPI00007926 | 2.21 | 0.1606 |
| LCN2 Uncharacterized protein LCN2                                                               | IPI00743064 | 1.51 | 0.1626 |
| ACOX2 Peroxisomal acyl-coenzyme A oxidase 2                                                     | IPI00293125 | 1.44 | 0.1639 |
| ATP6V0D1 Vacuolar proton pump subunit d 1                                                       | IPI00034159 | 1.36 | 0.1651 |
| RPS24 Isoform 2 of 40S ribosomal protein S24                                                    | IPI00847986 | 1.42 | 0.1687 |
| PARK7 Protein DJ-1                                                                              | IPI00298547 | 1.28 | 0.1712 |
| CAPN1 Calpain-1 catalytic subunit                                                               | IPI00011285 | 1.41 | 0.1725 |
| AGMAT Agmatinase, mitochondrial precursor                                                       | IPI00305360 | 1.44 | 0.1736 |
| SDHB Succinate dehydrogenase [ubiquinone] iron-sulfur subunit, mitochondrial precursor          | IPI00294911 | 1.55 | 0.1741 |

|                                                                                              |             |      |        |
|----------------------------------------------------------------------------------------------|-------------|------|--------|
| MGLL Monoglyceride lipase                                                                    | IPI00455206 | 1.41 | 0.1790 |
| CPNE3 Copine-3                                                                               | IPI00024403 | 1.29 | 0.1799 |
| UBE2V2 Ubiquitin-conjugating enzyme E2 variant 2                                             | IPI00019600 | 1.36 | 0.1824 |
| AKR7A2 Aflatoxin B1 aldehyde reductase member 2                                              | IPI00305978 | 1.19 | 0.1873 |
| DPP4 Dipeptidyl peptidase 4                                                                  | IPI00018953 | 1.37 | 0.1882 |
| MCCC2 Isoform 1 of Methylcrotonoyl-CoA carboxylase beta chain, mitochondrial                 | IPI00784044 | 1.63 | 0.1891 |
| COL14A1 Isoform 2 of Collagen alpha-1(XIV) chain precursor                                   | IPI00550918 | 1.29 | 0.1951 |
| LOC641293 Similar to 60S ribosomal protein L21                                               | IPI00845507 | 1.45 | 0.1977 |
| ST13 Suppression of tumorigenicity 13                                                        | IPI00892883 | 1.36 | 0.1992 |
| ECHDC2 Isoform 1 of Enoyl-CoA hydratase domain-containing protein 2, mitochondrial precursor | IPI00384676 | 1.28 | 0.2000 |
| ACE Isoform Somatic-1 of Angiotensin-converting enzyme, somatic isoform precursor            | IPI00437751 | 1.99 | 0.2039 |
| HK1 Isoform 2 of Hexokinase-1                                                                | IPI00220663 | 1.45 | 0.2041 |
| UQCRC1 Cytochrome b-c1 complex subunit 1, mitochondrial precursor                            | IPI00013847 | 1.50 | 0.2046 |
| CRYZ Quinone oxidoreductase                                                                  | IPI00000792 | 1.42 | 0.2046 |
| GLUD1 Glutamate dehydrogenase 1, mitochondrial precursor                                     | IPI00016801 | 1.28 | 0.2046 |
| TMEM65 Transmembrane protein 65                                                              | IPI00375577 | 1.37 | 0.2070 |
| FSCN1 FSCN1 protein (Fragment)                                                               | IPI00747810 | 1.33 | 0.2070 |
| AQP1 Aquaporin 1 splice variant 2                                                            | IPI00428490 | 3.03 | 0.2100 |
| TNXB 456 kDa protein                                                                         | IPI00644296 | 1.86 | 0.2100 |
| - A30                                                                                        | IPI00830122 | 1.80 | 0.2100 |
| ADH1B;ADH1C Uncharacterized protein ADH1C (Fragment)                                         | IPI00872991 | 1.43 | 0.2100 |
| AGT Angiotensinogen precursor                                                                | IPI00032220 | 1.40 | 0.2100 |
| - Myosin-reactive immunoglobulin kappa chain variable region (Fragment)                      | IPI00384401 | 1.40 | 0.2100 |
| WASF2 Wiskott-Aldrich syndrome protein family member 2                                       | IPI00472164 | 1.34 | 0.2100 |
| EML1 Isoform 3 of Echinoderm microtubule-associated protein-like 1                           | IPI00550611 | 1.34 | 0.2100 |
| DCN Isoform A of Decorin precursor                                                           | IPI00012119 | 1.31 | 0.2100 |
| EFNB1 Ephrin-B1                                                                              | IPI00024307 | 1.31 | 0.2100 |
| XPNPEP1 Xaa-Pro aminopeptidase 1                                                             | IPI00793375 | 1.31 | 0.2100 |
| MARCKSL1 MARCKS-related protein                                                              | IPI00641181 | 1.29 | 0.2100 |
| - Uncharacterized protein ENSP00000375034                                                    | IPI00854743 | 1.29 | 0.2100 |
| FLJ22662 hypothetical protein LOC79887                                                       | IPI00016255 | 1.26 | 0.2100 |
| - Rheumatoid factor G9 heavy chain (Fragment)                                                | IPI00815662 | 1.26 | 0.2100 |
| - V2-6 protein                                                                               | IPI00829740 | 1.26 | 0.2100 |
| DDT 14 kDa protein                                                                           | IPI00878984 | 1.26 | 0.2100 |
| LOC100129243 similar to hCG1994130                                                           | IPI00888774 | 1.26 | 0.2100 |
| PFAS Phosphoribosylformylglycinamide synthase                                                | IPI00004534 | 1.23 | 0.2100 |
| SNAP23 Isoform SNAP-23a of Synaptosomal-associated protein 23                                | IPI00010438 | 1.23 | 0.2100 |
| CTSL1 Cathepsin L1 precursor                                                                 | IPI00012887 | 1.23 | 0.2100 |
| IGLV1-40 V1-13 protein (Fragment)                                                            | IPI00789259 | 1.23 | 0.2100 |
| - 13 kDa protein                                                                             | IPI00829803 | 1.23 | 0.2100 |
| DPYSL3 Dihydropyrimidinase-related protein 3                                                 | IPI00872788 | 1.23 | 0.2100 |
| FLJ10769 Isoform 1 of Uncharacterized protein FLJ10769 precursor                             | IPI00873027 | 1.23 | 0.2100 |
| PVALB Parvalbumin (Fragment)                                                                 | IPI00877795 | 1.23 | 0.2100 |
| RCN1 Reticulocalbin-1                                                                        | IPI00015842 | 1.20 | 0.2100 |
| AHSG Alpha-2-HS-glycoprotein precursor                                                       | IPI00022431 | 1.20 | 0.2100 |
| FOLH1 Isoform PSMA of Glutamate carboxypeptidase 2                                           | IPI00216910 | 1.20 | 0.2100 |
| GCK Isoform 1 of Glucokinase                                                                 | IPI00244083 | 1.20 | 0.2100 |
| KIRREL Isoform 2 of Kin of IRRE-like protein 1                                               | IPI00470361 | 1.20 | 0.2100 |
| CORO1A 40 kDa protein                                                                        | IPI00642725 | 1.20 | 0.2100 |
| PEA15 Phosphoprotein enriched in astrocytes 15                                               | IPI00643342 | 1.20 | 0.2100 |
| - cDNA FLJ51351, highly similar to GTPase, IMAP family member 4                              | IPI00908338 | 1.20 | 0.2100 |
| NPTN Isoform 2 of Neuroplastin                                                               | IPI00018311 | 1.17 | 0.2100 |
| S100A6 Protein S100-A6                                                                       | IPI00027463 | 1.17 | 0.2100 |
| GPD1L Glycerol-3-phosphate dehydrogenase 1-like protein                                      | IPI00032959 | 1.17 | 0.2100 |
| RDH14;NT5C1B Retinol dehydrogenase 14                                                        | IPI00177940 | 1.17 | 0.2100 |
| PSMD9 Isoform p27-S of 26S proteasome non-ATPase regulatory subunit 9                        | IPI00216220 | 1.17 | 0.2100 |
| OPRS1 Isoform 1 of Sigma 1-type opioid receptor                                              | IPI00218268 | 1.17 | 0.2100 |
| SUMO2 Small ubiquitin-related modifier 2                                                     | IPI00299149 | 1.17 | 0.2100 |
| CARHSP1 Calcium-regulated heat stable protein 1                                              | IPI00304409 | 1.17 | 0.2100 |



|                                                                                             |             |      |        |
|---------------------------------------------------------------------------------------------|-------------|------|--------|
| HSP90AB4P Putative heat shock protein HSP 90-beta 4                                         | IPI00555565 | 1.17 | 0.2100 |
| IPI00746278                                                                                 | IPI00746278 | 1.17 | 0.2100 |
| PICALM Uncharacterized protein PICALM                                                       | IPI00871890 | 1.17 | 0.2100 |
| OSBPL8 Oxysterol-binding protein                                                            | IPI00873898 | 1.17 | 0.2100 |
| SERPINA5 Plasma serine protease inhibitor precursor                                         | IPI00007221 | 1.14 | 0.2100 |
| PSMD8 proteasome 26S non-ATPase subunit 8                                                   | IPI00010201 | 1.14 | 0.2100 |
| CDC37 Hsp90 co-chaperone Cdc37                                                              | IPI00013122 | 1.14 | 0.2100 |
| RPL36 60S ribosomal protein L36                                                             | IPI00216237 | 1.14 | 0.2100 |
| PRX Isoform 3 of Periaxin                                                                   | IPI00221069 | 1.14 | 0.2100 |
| NAPG Gamma-soluble NSF attachment protein                                                   | IPI00293817 | 1.14 | 0.2100 |
| TARS Threonyl-tRNA synthetase, cytoplasmic                                                  | IPI00329633 | 1.14 | 0.2100 |
| HNRNPAB Isoform 3 of Heterogeneous nuclear ribonucleoprotein A/B                            | IPI00334713 | 1.14 | 0.2100 |
| - Tryptophanyl-tRNA synthetase (Fragment)                                                   | IPI00383754 | 1.14 | 0.2100 |
| - Amyloid lambda 6 light chain variable region SAR (Fragment)                               | IPI00386839 | 1.14 | 0.2100 |
| FLJ11151 Isoform 2 of Uncharacterized metallophosphoesterase C5TP1                          | IPI00426077 | 1.14 | 0.2100 |
| REN Isoform 2 of Renin                                                                      | IPI00552207 | 1.14 | 0.2100 |
| NCALD Neurocalcin delta variant (Fragment)                                                  | IPI00555920 | 1.14 | 0.2100 |
| CES1 carboxylesterase 1 isoform c precursor                                                 | IPI00607693 | 1.14 | 0.2100 |
| NUDT5 Uncharacterized protein NUDT5                                                         | IPI00646762 | 1.14 | 0.2100 |
| ASPA 30 kDa protein                                                                         | IPI00790886 | 1.14 | 0.2100 |
| SNRPD3 19 kDa protein                                                                       | IPI00879750 | 1.14 | 0.2100 |
| HLA-DRB5;hCG_1998957;LOC100133811;RNASE2;ZNF749;HLA-DRB3;HLA-DRB1;HLA-DRB4                  | IPI00887556 | 1.14 | 0.2100 |
| FAM62B 98 kDa protein                                                                       | IPI00893476 | 1.14 | 0.2100 |
| - cDNA FLJ59206, highly similar to Eukaryotic translation initiation factor 4B              | IPI00908588 | 1.14 | 0.2100 |
| TIMM13 Mitochondrial import inner membrane translocase subunit Tim13                        | IPI00001589 | 1.11 | 0.2100 |
| PRPSAP2 Phosphoribosyl pyrophosphate synthetase-associated protein 2                        | IPI00003168 | 1.11 | 0.2100 |
| BCS1L Mitochondrial chaperone BCS1                                                          | IPI00003985 | 1.11 | 0.2100 |
| RAD23A UV excision repair protein RAD23 homolog A                                           | IPI00008219 | 1.11 | 0.2100 |
| ATP6V0A4 Vacuolar proton translocating ATPase 116 kDa subunit a isoform 4                   | IPI00009852 | 1.11 | 0.2100 |
| SLC5A2 Sodium/glucose cotransporter 2                                                       | IPI00012449 | 1.11 | 0.2100 |
| C1QA Complement C1q subcomponent subunit A                                                  | IPI00022392 | 1.11 | 0.2100 |
| SH3GLB1 Isoform 2 of Endophilin-B1                                                          | IPI00022824 | 1.11 | 0.2100 |
| FKBP3 FK506-binding protein 3                                                               | IPI00024157 | 1.11 | 0.2100 |
| M6PR Cation-dependent mannose-6-phosphate receptor                                          | IPI00025049 | 1.11 | 0.2100 |
| YBX1 Nuclease-sensitive element-binding protein 1                                           | IPI00031812 | 1.11 | 0.2100 |
| HNRPDL Isoform 3 of Heterogeneous nuclear ribonucleoprotein D-like                          | IPI00045498 | 1.11 | 0.2100 |
| NANS Sialic acid synthase                                                                   | IPI00147874 | 1.11 | 0.2100 |
| TOLLIP cDNA FLJ39374 fis, clone PEBLM2008576, highly similar to Homo sapiens TOLLIP protein | IPI00167490 | 1.11 | 0.2100 |
| ARL1 ADP-ribosylation factor-like protein 1                                                 | IPI00219518 | 1.11 | 0.2100 |
| DPP6 Isoform DPPX-L of Dipeptidyl aminopeptidase-like protein 6                             | IPI00301512 | 1.11 | 0.2100 |
| - Ig lambda chain V-III region SH                                                           | IPI00382436 | 1.11 | 0.2100 |
| RPL32 60S ribosomal protein L32                                                             | IPI00395998 | 1.11 | 0.2100 |
| PEX19 Peroxisomal biogenesis factor 19                                                      | IPI00642757 | 1.11 | 0.2100 |
| LPHN2 Uncharacterized protein LPHN2                                                         | IPI00746327 | 1.11 | 0.2100 |
| MYH10 Isoform 3 of Myosin-10                                                                | IPI00790503 | 1.11 | 0.2100 |
| RPL23A Protein                                                                              | IPI00794894 | 1.11 | 0.2100 |
| STRAP 12 kDa protein                                                                        | IPI00796172 | 1.11 | 0.2100 |
| CFI cDNA FLJ58124, highly similar to Complement factor I                                    | IPI00796990 | 1.11 | 0.2100 |
| COPS7A 18 kDa protein                                                                       | IPI00798179 | 1.11 | 0.2100 |
| COMMD8 Uncharacterized protein COMMD8                                                       | IPI00871891 | 1.11 | 0.2100 |
| ADPRH [Protein ADP-ribosylarginine] hydrolase                                               | IPI00009258 | 1.09 | 0.2100 |
| NMNAT1 Nicotinamide mononucleotide adenylyltransferase 1                                    | IPI00009726 | 1.09 | 0.2100 |
| EIF3E Eukaryotic translation initiation factor 3 subunit E                                  | IPI00013068 | 1.09 | 0.2100 |
| SLC1A1 Excitatory amino acid transporter 3                                                  | IPI00015475 | 1.09 | 0.2100 |
| SNRPG Small nuclear ribonucleoprotein G                                                     | IPI00016572 | 1.09 | 0.2100 |
| ENPP3 Ectonucleotide pyrophosphatase/phosphodiesterase family member 3                      | IPI00020999 | 1.09 | 0.2100 |
| APOA2 Apolipoprotein A-II precursor                                                         | IPI00021854 | 1.09 | 0.2100 |
| PSMC5 26S protease regulatory subunit 8                                                     | IPI00023919 | 1.09 | 0.2100 |
| MMP8 Neutrophil collagenase                                                                 | IPI00027846 | 1.09 | 0.2100 |

|                                                                                    |              |      |        |
|------------------------------------------------------------------------------------|--------------|------|--------|
| GMPPB Isoform 1 of Mannose-1-phosphate guanyltransferase beta                      | IPI00030920  | 1.09 | 0.2100 |
| GPNPAT1 Glucosamine 6-phosphate N-acetyltransferase                                | IPI00061525  | 1.09 | 0.2100 |
| GBA2 Isoform 1 of Non-lysosomal glucosylceramidase                                 | IPI00100668  | 1.09 | 0.2100 |
| DARS Aspartyl-tRNA synthetase, cytoplasmic                                         | IPI00216951  | 1.09 | 0.2100 |
| PAFAH1B1 Isoform 1 of Platelet-activating factor acetylhydrolase IB subunit alpha  | IPI00218728  | 1.09 | 0.2100 |
| ITIH1 Inter-alpha-trypsin inhibitor heavy chain H1                                 | IPI00292530  | 1.09 | 0.2100 |
| F9 Coagulation factor IX precursor                                                 | IPI00296176  | 1.09 | 0.2100 |
| FAM49B Protein FAM49B                                                              | IPI00303318  | 1.09 | 0.2100 |
| DOLPP1 Dolichyldiphosphatase 1                                                     | IPI00329410  | 1.09 | 0.2100 |
| NUP93 Nuclear pore complex protein Nup93                                           | IPI00397904  | 1.09 | 0.2100 |
| ALPL Alkaline phosphatase, tissue-nonspecific isozyme precursor                    | IPI00419916  | 1.09 | 0.2100 |
| CROCC Isoform 1 of Rootletin                                                       | IPI00456492  | 1.09 | 0.2100 |
| COPS5 COP9 signalosome subunit 5 variant (Fragment)                                | IPI00556139  | 1.09 | 0.2100 |
| CARS cysteinyl-tRNA synthetase isoform d                                           | IPI00556541  | 1.09 | 0.2100 |
| TIMP3 TIMP metalloproteinase inhibitor 3                                           | IPI00640293  | 1.09 | 0.2100 |
| FHL1 Isoform 1 of Four and a half LIM domains protein 1                            | IPI00647207  | 1.09 | 0.2100 |
| NUDT16 Nucleoside diphosphate-linked moiety X motif 16                             | IPI00783497  | 1.09 | 0.2100 |
| NT5C 20 kDa protein                                                                | IPI00790117  | 1.09 | 0.2100 |
| TRAM1 TRAM1 protein (Fragment)                                                     | IPI00790653  | 1.09 | 0.2100 |
| - VH87-2 protein (Fragment)                                                        | IPI00827892  | 1.09 | 0.2100 |
| UNC84A Unc-84 homolog A                                                            | IPI00844303  | 1.09 | 0.2100 |
| MIOX Myo-inositol oxygenase                                                        | IPI00852977  | 1.09 | 0.2100 |
| - Ribonuclease T2                                                                  | IPI00855775  | 1.09 | 0.2100 |
| SEPT9 22 kDa protein                                                               | IPI00871679  | 1.09 | 0.2100 |
| TBCA 16 kDa protein                                                                | IPI00872214  | 1.09 | 0.2100 |
| MOBK1B Uncharacterized protein MOBKL1B (Fragment)                                  | IPI00879358  | 1.09 | 0.2100 |
| LOC650788 similar to 40S ribosomal protein S28                                     | IPI00887241  | 1.09 | 0.2100 |
| - Cryocryoglobulin CC1 heavy chain variable region (Fragment)                      | IPI00890754  | 1.09 | 0.2100 |
| C2orf30 chromosome 2 open reading frame 30 isoform 2                               | IPI00894202  | 1.09 | 0.2100 |
| IPIr00045565                                                                       | IPIr00045565 | 1.09 | 0.2100 |
| IPIr00305305                                                                       | IPIr00305305 | 1.09 | 0.2100 |
| MAT2A S-adenosylmethionine synthetase isoform type-2                               | IPI00010157  | 1.06 | 0.2100 |
| DNAJB1 DnaJ homolog subfamily B member 1                                           | IPI00015947  | 1.06 | 0.2100 |
| CSPG4 Chondroitin sulfate proteoglycan 4                                           | IPI00019157  | 1.06 | 0.2100 |
| ZYX Zyxin                                                                          | IPI00020513  | 1.06 | 0.2100 |
| IMPA1 Inositol monophosphatase                                                     | IPI00020906  | 1.06 | 0.2100 |
| MRPL15 39S ribosomal protein L15, mitochondrial                                    | IPI00023086  | 1.06 | 0.2100 |
| GSX1 GS homeobox 1                                                                 | IPI00028199  | 1.06 | 0.2100 |
| C9orf142 Isoform 1 of Uncharacterized protein C9orf142                             | IPI00030968  | 1.06 | 0.2100 |
| BAT2 Isoform 2 of Large proline-rich protein BAT2                                  | IPI00084746  | 1.06 | 0.2100 |
| GPSN2 Isoform 1 of Synaptic glycoprotein SC2                                       | IPI00100656  | 1.06 | 0.2100 |
| COMMD1 COMM domain-containing protein 1                                            | IPI00171117  | 1.06 | 0.2100 |
| ALMS1 ALMS1                                                                        | IPI00178743  | 1.06 | 0.2100 |
| MTPN Myotrophin                                                                    | IPI00179589  | 1.06 | 0.2100 |
| GPHN Isoform 2 of Gephyrin                                                         | IPI00184477  | 1.06 | 0.2100 |
| IL18 Interleukin-18 precursor                                                      | IPI00290198  | 1.06 | 0.2100 |
| C18orf19 Uncharacterized protein C18orf19                                          | IPI00290799  | 1.06 | 0.2100 |
| SLC25A40 Solute carrier family 25 member 40                                        | IPI00290827  | 1.06 | 0.2100 |
| TSNAX Translin-associated protein X                                                | IPI00293350  | 1.06 | 0.2100 |
| STT3A Dolichyl-diphosphooligosaccharide--protein glycosyltransferase subunit STT3A | IPI00297492  | 1.06 | 0.2100 |
| PDHX Pyruvate dehydrogenase protein X component, mitochondrial                     | IPI00298423  | 1.06 | 0.2100 |
| ELAVL1 cDNA FLJ60076, highly similar to ELAV-like protein 1                        | IPI00301936  | 1.06 | 0.2100 |
| CRK v-crk sarcoma virus CT10 oncogene homolog isoform b                            | IPI00305469  | 1.06 | 0.2100 |
| MCFD2 Multiple coagulation factor deficiency protein 2                             | IPI00328680  | 1.06 | 0.2100 |
| MDP-1 Isoform 2 of Magnesium-dependent phosphatase 1                               | IPI00385758  | 1.06 | 0.2100 |
| LPHN2 Isoform 1 of Latrophilin-2                                                   | IPI00410232  | 1.06 | 0.2100 |
| C2orf55 Uncharacterized protein C2orf55                                            | IPI00410436  | 1.06 | 0.2100 |
| INPP5A Inositol polyphosphate-5-phosphatase, 40kDa                                 | IPI00413212  | 1.06 | 0.2100 |
| SLC22A11 Isoform 2 of Solute carrier family 22 member 11                           | IPI00418660  | 1.06 | 0.2100 |

|                                                                                                   |              |      |        |
|---------------------------------------------------------------------------------------------------|--------------|------|--------|
| UBE2I Ubiquitin carrier protein                                                                   | IPI00450472  | 1.06 | 0.2100 |
| CUL4B Isoform 2 of Cullin-4B                                                                      | IPI00480142  | 1.06 | 0.2100 |
| SARS Seryl-tRNA synthetase                                                                        | IPI00514587  | 1.06 | 0.2100 |
| PREX1 Isoform 3 of Phosphatidylinositol 3,4,5-trisphosphate-dependent Rac exchanger 1 protein     | IPI00552692  | 1.06 | 0.2100 |
| HM13 Isoform 5 of Minor histocompatibility antigen H13                                            | IPI00552772  | 1.06 | 0.2100 |
| ALDH3B1 Aldehyde dehydrogenase 3B1 variant (Fragment)                                             | IPI00555728  | 1.06 | 0.2100 |
| DBP D site of albumin promoter (Albumin D-box) binding protein variant (Fragment)                 | IPI00556150  | 1.06 | 0.2100 |
| TM9SF3 SM-11044 binding protein                                                                   | IPI00644458  | 1.06 | 0.2100 |
| USP7 Ubiquitin carboxyl-terminal hydrolase                                                        | IPI00646721  | 1.06 | 0.2100 |
| CPNE1 Copine I                                                                                    | IPI00647692  | 1.06 | 0.2100 |
| SAT2 SAT2 protein                                                                                 | IPI00744810  | 1.06 | 0.2100 |
| - cDNA FLJ38090 fis, clone CTONG2026513                                                           | IPI00746933  | 1.06 | 0.2100 |
| FAM98B family with sequence similarity 98, member B isoform 1                                     | IPI00760837  | 1.06 | 0.2100 |
| PYGL Glycogen phosphorylase, liver form                                                           | IPI00783313  | 1.06 | 0.2100 |
| GCHFR 8 kDa protein                                                                               | IPI00793097  | 1.06 | 0.2100 |
| PTDSS1 PTDSS1 protein                                                                             | IPI00794618  | 1.06 | 0.2100 |
| VPS28 23 kDa protein                                                                              | IPI00794724  | 1.06 | 0.2100 |
| TYMP cDNA, FLJ95575, highly similar to Homo sapiens endothelial cell growth factor 1 (platelet)   | IPI00852987  | 1.06 | 0.2100 |
| FUS Uncharacterized protein FUS                                                                   | IPI00854677  | 1.06 | 0.2100 |
| CUL5 Uncharacterized protein CUL5 (Fragment)                                                      | IPI00871370  | 1.06 | 0.2100 |
| COL1A2 130 kDa protein                                                                            | IPI00873137  | 1.06 | 0.2100 |
| CGNL1 Isoform 2 of Cingulin-like protein 1                                                        | IPI00877055  | 1.06 | 0.2100 |
| IARS isoleucyl-tRNA synthetase                                                                    | IPI00877938  | 1.06 | 0.2100 |
| TCFL5 Isoform 3 of Transcription factor-like 5 protein                                            | IPI00880158  | 1.06 | 0.2100 |
| FUSSEL18 functional smad suppressing element 18                                                   | IPI00886861  | 1.06 | 0.2100 |
| LOC651709 similar to facioscapulohumeral muscular dystrophy                                       | IPI00888492  | 1.06 | 0.2100 |
| - Uncharacterized protein ENSP00000343301 (Fragment)                                              | IPI00890757  | 1.06 | 0.2100 |
| TSSC1 15 kDa protein                                                                              | IPI00894442  | 1.06 | 0.2100 |
| IPI00894504                                                                                       | IPI00894504  | 1.06 | 0.2100 |
| LCE3D Late cornified envelope 3D                                                                  | IPI00902813  | 1.06 | 0.2100 |
| - cDNA FLJ52861, moderately similar to Homo sapiens hydroxysteroid dehydrogenase like 1 (HSD17B8) | IPI00909286  | 1.06 | 0.2100 |
| - cDNA FLJ59387, highly similar to Protein D11Lgp1 homolog                                        | IPI00909449  | 1.06 | 0.2100 |
| - cDNA FLJ60588, highly similar to Protein arginine N-methyltransferase 1                         | IPI00909470  | 1.06 | 0.2100 |
| - NADH dehydrogenase subunit 4                                                                    | IPI00910137  | 1.06 | 0.2100 |
| - cDNA FLJ56904, highly similar to RNA-binding protein Musashi homolog 2                          | IPI00910884  | 1.06 | 0.2100 |
| IPIr00008531                                                                                      | IPIr00008531 | 1.06 | 0.2100 |
| IPIr00022200                                                                                      | IPIr00022200 | 1.06 | 0.2100 |
| IPIr00028031                                                                                      | IPIr00028031 | 1.06 | 0.2100 |
| IPIr00103552                                                                                      | IPIr00103552 | 1.06 | 0.2100 |
| IPIr00167941                                                                                      | IPIr00167941 | 1.06 | 0.2100 |
| IPIr00293895                                                                                      | IPIr00293895 | 1.06 | 0.2100 |
| IPIr00375415                                                                                      | IPIr00375415 | 1.06 | 0.2100 |
| IPIr00383951                                                                                      | IPIr00383951 | 1.06 | 0.2100 |
| IPIr00384789                                                                                      | IPIr00384789 | 1.06 | 0.2100 |
| IPIr00413568                                                                                      | IPIr00413568 | 1.06 | 0.2100 |
| IPIr00654875                                                                                      | IPIr00654875 | 1.06 | 0.2100 |
| IPIr00744706                                                                                      | IPIr00744706 | 1.06 | 0.2100 |
| IPIr00749276                                                                                      | IPIr00749276 | 1.06 | 0.2100 |
| IPIr00794549                                                                                      | IPIr00794549 | 1.06 | 0.2100 |
| AKR7A3 Aflatoxin B1 aldehyde reductase member 3                                                   | IPI00293721  | 1.72 | 0.2120 |
| HSD17B8 Estradiol 17-beta-dehydrogenase 8                                                         | IPI00021890  | 1.26 | 0.2152 |
| TMEM126A Transmembrane protein 126A                                                               | IPI00031064  | 1.39 | 0.2161 |
| NDUFB6 NADH dehydrogenase [ubiquinone] 1 beta subcomplex subunit 6                                | IPI00219385  | 1.19 | 0.2183 |
| UQCRC2 Cytochrome b-c1 complex subunit 2, mitochondrial precursor                                 | IPI00305383  | 1.46 | 0.2207 |
| HADH Isoform 2 of Hydroxyacyl-coenzyme A dehydrogenase, mitochondrial precursor                   | IPI00298406  | 1.42 | 0.2210 |
| ECHS1 Enoyl-CoA hydratase, mitochondrial precursor                                                | IPI00024993  | 1.18 | 0.2210 |
| PHB2 Prohibitin-2                                                                                 | IPI00027252  | 1.33 | 0.2212 |
| ANPEP Aminopeptidase N                                                                            | IPI00221224  | 2.08 | 0.2215 |
| - Putative uncharacterized protein DKFZp686M24218                                                 | IPI00784998  | 1.89 | 0.2288 |

|                                                                                                          |               |      |        |
|----------------------------------------------------------------------------------------------------------|---------------|------|--------|
| ATP5L ATP synthase subunit g, mitochondrial                                                              | IPI00027448   | 1.90 | 0.2317 |
| SLC3A1 Neutral and basic amino acid transport protein rBAT                                               | IPI00029268   | 2.08 | 0.2320 |
| RPL24 20 kDa protein                                                                                     | IPI00873403   | 1.26 | 0.2355 |
| C14orf124 Isoform 2 of UPF0105 protein C14orf124                                                         | IPI00643286   | 1.19 | 0.2355 |
| PFDN2 Prefoldin subunit 2                                                                                | IPI00006052   | 1.13 | 0.2355 |
| ALDOC Fructose-bisphosphate aldolase                                                                     | IPI00792375   | 1.35 | 0.2361 |
| PRTN3 Myeloblastin                                                                                       | IPI00027409   | 1.33 | 0.2361 |
| CDH2 Uncharacterized protein CDH2                                                                        | IPI00658202   | 1.33 | 0.2361 |
| SERPINF1 Pigment epithelium-derived factor precursor                                                     | IPI00006114   | 1.30 | 0.2361 |
| ATP6V1G1 Vacuolar proton pump subunit G 1                                                                | IPI00025285   | 1.29 | 0.2361 |
| TMEM33 Transmembrane protein 33                                                                          | IPI00299084   | 1.28 | 0.2361 |
| F2 Prothrombin precursor (Fragment)                                                                      | IPI00019568   | 1.21 | 0.2361 |
| NQO1 NAD(P)H menadione oxidoreductase 1, dioxin-inducible isoform b                                      | IPI00619966   | 1.21 | 0.2362 |
| NIPSNAP1 Protein NipSnap homolog 1                                                                       | IPI00304435   | 1.24 | 0.2383 |
| PSMB8 Isoform 1 of Proteasome subunit beta type-8                                                        | IPI00000783   | 1.29 | 0.2496 |
| CAPNS1 Calpain small subunit 1                                                                           | IPI00025084   | 1.41 | 0.2499 |
| PLS1 PLS1 protein                                                                                        | IPI00789401   | 1.17 | 0.2509 |
| AGXT2 Alanine--glyoxylate aminotransferase 2, mitochondrial precursor                                    | IPI00011075   | 1.44 | 0.2514 |
| GPX4 Isoform Mitochondrial of Phospholipid hydroperoxide glutathione peroxidase, mitochondrial precursor | IPI00304814   | 1.26 | 0.2549 |
| HGD;LOC100132552 homogentisate 1,2-dioxygenase                                                           | IPI00887960   | 1.14 | 0.2556 |
| IDH1 Isocitrate dehydrogenase [NADP] cytoplasmic                                                         | IPI00027223   | 1.48 | 0.2561 |
| C8orf55 Uncharacterized protein C8orf55 precursor                                                        | IPI00171421   | 1.21 | 0.2565 |
| hCG_39912 hypothetical protein LOC642250                                                                 | IPI00887088   | 1.55 | 0.2573 |
| ATP5F1 ATP synthase subunit b, mitochondrial precursor                                                   | IPI00029133   | 1.27 | 0.2574 |
| PCCB Propionyl-CoA carboxylase beta chain, mitochondrial precursor                                       | IPI00007247   | 1.27 | 0.2574 |
| HSPD1 60 kDa heat shock protein, mitochondrial precursor                                                 | IPI00784154   | 1.35 | 0.2576 |
| ALDH2 Mitochondrial aldehyde dehydrogenase 2 variant (Fragment)                                          | IPI00792207   | 1.33 | 0.2576 |
| WARS Tryptophanyl-tRNA synthetase, cytoplasmic                                                           | IPI00295400   | 1.27 | 0.2613 |
| PPA1 Inorganic pyrophosphatase                                                                           | IPI00015018   | 1.20 | 0.2613 |
| FABP3 Fatty acid-binding protein, heart                                                                  | IPI00219684   | 1.41 | 0.2642 |
| PCBD1 Pterin-4-alpha-carbinolamine dehydratase                                                           | IPI00218568   | 1.35 | 0.2642 |
| RAB33B Ras-related protein Rab-33B                                                                       | IPI00021475   | 1.30 | 0.2642 |
| RPL10 ribosomal protein L10                                                                              | IPI00853161   | 1.27 | 0.2642 |
| ATP5I ATP synthase, H+ transporting, mitochondrial F0 complex, subunit E                                 | IPI00218848   | 1.21 | 0.2642 |
| EIF2S1 Eukaryotic translation initiation factor 2 subunit 1                                              | IPI00219678   | 1.19 | 0.2642 |
| SH3BGRL 13 kDa protein                                                                                   | IPI00872670   | 1.19 | 0.2642 |
| HNMT Histamine N-methyltransferase                                                                       | IPI00030023   | 1.17 | 0.2642 |
| MCEE Methylmalonyl-CoA epimerase, mitochondrial precursor                                                | IPI00107722   | 1.16 | 0.2642 |
| - cDNA FLJ53377, highly similar to Procollagen-lysine, 2-oxoglutarate 5-dioxygenase 1                    | IPI00910343   | 1.16 | 0.2642 |
| TCP1 T-complex protein 1 isoform b                                                                       | IPI00550591   | 1.31 | 0.2656 |
| SHOX2 Isoform 2 of Short stature homeobox protein 2                                                      | IPI00218369   | 1.13 | 0.2746 |
| ATP6V1H Isoform 2 of Vacuolar proton pump subunit H                                                      | IPI00414079   | 1.54 | 0.2747 |
| PGAM1 Phosphoglycerate mutase 1                                                                          | IPI00549725   | 1.43 | 0.2751 |
| DCTN1 Isoform p135 of Dynactin subunit 1                                                                 | IPI00219114   | 1.17 | 0.2754 |
| MAT2B Isoform 1 of Methionine adenosyltransferase 2 subunit beta                                         | IPI00002324   | 1.15 | 0.2758 |
| ATP6V1A Vacuolar ATP synthase catalytic subunit A                                                        | IPI00007682   | 1.77 | 0.2769 |
| RPL14 RPL14 protein                                                                                      | IPI00555744   | 1.36 | 0.2788 |
| SLC5A12 Isoform 1 of Sodium-coupled monocarboxylate transporter 2                                        | IPI00760881   | 1.34 | 0.2788 |
| sp CASB_BOVIN                                                                                            | sp CASB_BOVIN | 1.56 | 0.2794 |
| CD34 Isoform CD34-T of Hematopoietic progenitor cell antigen CD34                                        | IPI00299994   | 1.50 | 0.2803 |
| RPL11 Isoform 2 of 60S ribosomal protein L11                                                             | IPI00746438   | 1.11 | 0.2931 |
| MCTS1 cDNA FLJ59683, highly similar to Homo sapiens malignant T cell amplified sequence 1                | IPI00645446   | 1.11 | 0.2934 |
| API5 Isoform 1 of Apoptosis inhibitor 5                                                                  | IPI00555572   | 1.08 | 0.2934 |
| ISYNA1 52 kDa protein                                                                                    | IPI00645069   | 1.08 | 0.2934 |
| AZU1 Azurocidin                                                                                          | IPI00022246   | 1.83 | 0.2958 |
| DBI Isoform a 1 of Acyl-CoA-binding protein                                                              | IPI00010182   | 1.57 | 0.2958 |
| - cDNA FLJ54049, highly similar to Multimerin-2                                                          | IPI00908953   | 1.35 | 0.2958 |
| LRG1 Leucine-rich alpha-2-glycoprotein precursor                                                         | IPI00022417   | 1.30 | 0.2958 |
| LOC554235 Putative L-aspartate dehydrogenase                                                             | IPI00419903   | 1.30 | 0.2958 |

|                                                                                              |               |      |        |
|----------------------------------------------------------------------------------------------|---------------|------|--------|
| SLC13A3 Isoform 3 of Solute carrier family 13 member 3                                       | IPI00747380   | 1.24 | 0.2958 |
| ME2 NAD-dependent malic enzyme, mitochondrial precursor                                      | IPI00011201   | 1.22 | 0.2958 |
| CA12 Isoform 2 of Carbonic anhydrase 12 precursor                                            | IPI00221392   | 1.32 | 0.2958 |
| GPX3 Glutathione peroxidase 3 precursor                                                      | IPI00026199   | 1.10 | 0.2964 |
| SNCA Isoform 2-4 of Alpha-synuclein                                                          | IPI00218467   | 1.17 | 0.2967 |
| - Immunglobulin heavy chain variable region (Fragment)                                       | IPI00783287   | 1.30 | 0.2971 |
| MAOB Amine oxidase [flavin-containing] B                                                     | IPI00328156   | 1.33 | 0.2974 |
| ATP5O ATP synthase subunit O, mitochondrial precursor                                        | IPI00007611   | 1.30 | 0.2974 |
| ENPEP Glutamyl aminopeptidase                                                                | IPI00014375   | 1.26 | 0.2974 |
| CA1 Carbonic anhydrase 1                                                                     | IPI00215983   | 1.15 | 0.2976 |
| CALML3 Calmodulin-like protein 3                                                             | IPI00216984   | 1.09 | 0.3019 |
| RPL19 60S ribosomal protein L19                                                              | IPI00025329   | 1.20 | 0.3020 |
| CSRP1 Cysteine and glycine-rich protein 1                                                    | IPI00442073   | 1.21 | 0.3097 |
| VAPA Vesicle-associated membrane protein-associated protein A                                | IPI00170692   | 1.21 | 0.3131 |
| IVD Isovaleryl-CoA dehydrogenase, mitochondrial precursor                                    | IPI00789848   | 1.35 | 0.3179 |
| HBB Hemoglobin subunit beta                                                                  | IPI00654755   | 1.20 | 0.3189 |
| IDH3B Isoform A of Isocitrate dehydrogenase [NAD] subunit beta, mitochondrial                | IPI00304419   | 1.09 | 0.3286 |
| USP14 cDNA, FLJ96494, highly similar to Homo sapiens ubiquitin specific peptidase 14 (tRNA-c | IPI00871297   | 1.09 | 0.3286 |
| S100A10 Protein S100-A10                                                                     | IPI00183695   | 1.17 | 0.3295 |
| - 19 kDa protein                                                                             | IPI00872915   | 1.53 | 0.3384 |
| ATP1A1 ATPase, Na+/K+ transporting, alpha 1 polypeptide                                      | IPI00646182   | 1.52 | 0.3416 |
| sp TRYP_PIG                                                                                  | sp TRYP_PIG   | 1.23 | 0.3416 |
| ALDH4A1 Aldehyde dehydrogenase 4 family, member A1                                           | IPI00647328   | 1.18 | 0.3416 |
| HBA1;HBA2 Alpha 2 globin variant (Fragment)                                                  | IPI00853068   | 1.17 | 0.3416 |
| CYCS Cytochrome c                                                                            | IPI00465315   | 1.30 | 0.3503 |
| CDC42 Isoform 2 of Cell division control protein 42 homolog precursor                        | IPI00016786   | 1.24 | 0.3631 |
| EEF2 Elongation factor 2                                                                     | IPI00186290   | 1.13 | 0.3644 |
| CLDN3 Claudin-3                                                                              | IPI00007364   | 1.10 | 0.3649 |
| SCRN2 Secernin-2                                                                             | IPI00062266   | 1.10 | 0.3649 |
| PABPC1 70 kDa protein                                                                        | IPI00796945   | 1.07 | 0.3649 |
| SRP68 Isoform 1 of Signal recognition particle 68 kDa protein                                | IPI00168388   | 1.07 | 0.3649 |
| SAA1;SAA2 serum amyloid A2 isoform a                                                         | IPI00006146   | 1.02 | 0.3649 |
| ECHDC1 enoyl Coenzyme A hydratase domain containing 1 isoform 3                              | IPI00645630   | 1.02 | 0.3649 |
| AZGP1 alpha-2-glycoprotein 1, zinc                                                           | IPI00166729   | 1.20 | 0.3697 |
| APOB Apolipoprotein B-100 precursor                                                          | IPI00022229   | 2.44 | 0.3836 |
| NDUFS8 NADH dehydrogenase [ubiquinone] iron-sulfur protein 8, mitochondrial precursor        | IPI00010845   | 1.16 | 0.3861 |
| ICAM1 Intercellular adhesion molecule 1 precursor                                            | IPI00008494   | 1.41 | 0.3864 |
| ARPC1A Actin-related protein 2/3 complex subunit 1A                                          | IPI00333068   | 1.19 | 0.3864 |
| DERA Putative deoxyribose-phosphate aldolase                                                 | IPI00219677   | 1.20 | 0.3874 |
| BRP44 Brain protein 44                                                                       | IPI00640179   | 1.20 | 0.3878 |
| PTRF cDNA FLJ53495, highly similar to Polymerase I and transcript release factor             | IPI00514023   | 1.12 | 0.3880 |
| HMGCL Hydroxymethylglutaryl-CoA lyase, mitochondrial precursor                               | IPI00293564   | 1.21 | 0.3881 |
| ACADSB Short/branched chain specific acyl-CoA dehydrogenase, mitochondrial precursor         | IPI00024623   | 1.21 | 0.3884 |
| LOC654188 similar to peptidylprolyl isomerase A-like                                         | IPI00887678   | 1.09 | 0.3891 |
| PCCA propionyl-Coenzyme A carboxylase, alpha polypeptide isoform b                           | IPI00895869   | 1.27 | 0.3896 |
| ATP5A1 ATP synthase subunit alpha, mitochondrial precursor                                   | IPI00440493   | 1.17 | 0.3896 |
| sp CAS2_BOVIN                                                                                | sp CAS2_BOVIN | 1.36 | 0.3934 |
| AUH Isoform 1 of Methylglutaconyl-CoA hydratase, mitochondrial precursor                     | IPI00017802   | 1.20 | 0.4049 |
| TMEM109 Transmembrane protein 109 precursor                                                  | IPI00031697   | 1.30 | 0.4057 |
| OXCT1 Succinyl-CoA:3-ketoacid-coenzyme A transferase 1, mitochondrial precursor              | IPI00026516   | 1.23 | 0.4093 |
| ABHD10 Abhydrolase domain-containing protein 10, mitochondrial precursor                     | IPI00020075   | 1.21 | 0.4119 |
| CFL1 Cofilin-1                                                                               | IPI00012011   | 1.33 | 0.4143 |
| PHB Prohibitin                                                                               | IPI00017334   | 1.23 | 0.4145 |
| ATP5C1 Isoform Liver of ATP synthase subunit gamma, mitochondrial precursor                  | IPI00478410   | 1.05 | 0.4145 |
| DAK Dihydroxyacetone kinase                                                                  | IPI00551024   | 1.21 | 0.4257 |
| AOX1 aldehyde oxidase 1                                                                      | IPI00872655   | 1.71 | 0.4258 |
| ABHD14B Uncharacterized protein ABHD14B                                                      | IPI00747859   | 1.19 | 0.4277 |
| ALDH5A1 aldehyde dehydrogenase 5A1 precursor, isoform 1                                      | IPI00336008   | 1.37 | 0.4378 |
| GBAS Protein NipSnap homolog 2                                                               | IPI00016077   | 1.16 | 0.4395 |

|                                                                                               |               |      |        |
|-----------------------------------------------------------------------------------------------|---------------|------|--------|
| HLA-DRA HLA class II histocompatibility antigen, DR alpha chain                               | IPI00005171   | 1.54 | 0.4400 |
| LTF Truncated lactoferrin                                                                     | IPI00789477   | 1.28 | 0.4407 |
| - cDNA FLJ76502, highly similar to Homo sapiens ubiquinol-cytochrome c reductase, Rieske iron | IPI00883602   | 1.24 | 0.4409 |
| MDH2 Malate dehydrogenase, mitochondrial precursor                                            | IPI00291006   | 1.35 | 0.4412 |
| KRT18P33 similar to hCG21219                                                                  | IPI00888063   | 1.19 | 0.4412 |
| VPS26A Vacuolar protein sorting-associated protein 26A                                        | IPI00411426   | 1.16 | 0.4485 |
| PGM2 Phosphoglucomutase-2                                                                     | IPI00550364   | 1.12 | 0.4485 |
| COX7A2 Uncharacterized protein COX7A2                                                         | IPI00872879   | 1.23 | 0.4495 |
| BLVRA Biliverdin reductase A precursor                                                        | IPI00294158   | 1.03 | 0.4544 |
| GSS Glutathione synthetase                                                                    | IPI00010706   | 1.34 | 0.4552 |
| RPL15 22 kDa protein                                                                          | IPI00790569   | 1.16 | 0.4552 |
| DAG1 Dystroglycan precursor                                                                   | IPI00028911   | 1.13 | 0.4552 |
| ATP2B4 ATP2B4 protein                                                                         | IPI00856079   | 1.31 | 0.4556 |
| CAPS;LOC643635;ABHD6 calcyphosine isoform b                                                   | IPI00103067   | 1.19 | 0.4556 |
| C1QC Complement C1q subcomponent subunit C                                                    | IPI00022394   | 1.04 | 0.4559 |
| ZNF503 Isoform 2 of Zinc finger protein 503                                                   | IPI00843984   | 1.15 | 0.4651 |
| LOC642103 similar to hCG1811191                                                               | IPI00741768   | 1.40 | 0.4678 |
| ACADS Short-chain specific acyl-CoA dehydrogenase, mitochondrial precursor                    | IPI00027701   | 1.21 | 0.4678 |
| PSME2 proteasome activator subunit 2                                                          | IPI00746205   | 1.14 | 0.4678 |
| GSTA1 Glutathione S-transferase A1                                                            | IPI00657682   | 1.42 | 0.4683 |
| MVP Major vault protein                                                                       | IPI00000105   | 1.30 | 0.4683 |
| PRDX1 19 kDa protein                                                                          | IPI00640741   | 1.40 | 0.4685 |
| ASS1 Argininosuccinate synthase                                                               | IPI00020632   | 1.35 | 0.4685 |
| BCAT2 cDNA FLJ36308 fis, clone THYMU2004916, highly similar to Branched-chain-amino-acid      | IPI00181135   | 1.17 | 0.4767 |
| BBOX1 Gamma-butyrobetaine dioxygenase                                                         | IPI00027416   | 1.10 | 0.4807 |
| ATP6V1F Vacuolar proton pump subunit F                                                        | IPI00004488   | 1.13 | 0.4819 |
| TPT1 Translationally-controlled tumor protein                                                 | IPI00550900   | 1.08 | 0.4819 |
| NDUFA6 NADH dehydrogenase (ubiquinone) 1 alpha subcomplex, 6, 14kDa                           | IPI00419266   | 1.14 | 0.4825 |
| PDCD6IP Dopamine receptor interacting protein 4                                               | IPI00871576   | 1.37 | 0.4829 |
| MT-ND5 NADH dehydrogenase subunit 5                                                           | IPI00221391   | 1.15 | 0.4829 |
| ATP6V0A1 97 kDa protein                                                                       | IPI00892784   | 1.33 | 0.4832 |
| COX5B Cytochrome c oxidase subunit 5B, mitochondrial precursor                                | IPI00021785   | 1.22 | 0.4864 |
| APOD Apolipoprotein D precursor                                                               | IPI00006662   | 1.32 | 0.4879 |
| PSMB6 20 kDa protein                                                                          | IPI00789119   | 1.13 | 0.4883 |
| DNAJA1 DnaJ homolog subfamily A member 1                                                      | IPI00012535   | 1.18 | 0.4936 |
| TMEM111 18 kDa protein                                                                        | IPI00789434   | 1.14 | 0.4936 |
| LSS Lanosterol synthase                                                                       | IPI00009747   | 1.10 | 0.4936 |
| CCT2 T-complex protein 1 subunit beta                                                         | IPI00297779   | 1.19 | 0.4941 |
| ARPC2 Actin-related protein 2/3 complex subunit 2                                             | IPI00005161   | 1.26 | 0.4963 |
| THEM2 Thioesterase superfamily member 2                                                       | IPI00020530   | 1.20 | 0.4970 |
| AK2 Isoform 2 of Adenylate kinase isoenzyme 2, mitochondrial                                  | IPI00218988   | 1.04 | 0.4970 |
| RAB21 Ras-related protein Rab-21                                                              | IPI00007755   | 1.21 | 0.5023 |
| - PC1/MRPS28 fusion protein                                                                   | IPI00854568   | 1.33 | 0.5061 |
| - cDNA FLJ58737, highly similar to Splicing factor 3A subunit 3                               | IPI00908449   | 1.16 | 0.5172 |
| CDH16 Isoform 1 of Cadherin-16 precursor                                                      | IPI00025240   | 1.16 | 0.5178 |
| RPS16 40S ribosomal protein S16                                                               | IPI00221092   | 1.17 | 0.5196 |
| SPCS3 Signal peptidase complex subunit 3                                                      | IPI00300299   | 1.11 | 0.5207 |
| RPS18;LOC100130553 40S ribosomal protein S18                                                  | IPI00013296   | 1.20 | 0.5216 |
| C20orf3 Adipocyte plasma membrane-associated protein                                          | IPI00031131   | 1.11 | 0.5252 |
| sp CAS1_BOVIN                                                                                 | sp CAS1_BOVIN | 1.45 | 0.5257 |
| ACOX1 Isoform 2 of Peroxisomal acyl-coenzyme A oxidase 1                                      | IPI00477729   | 1.07 | 0.5257 |
| CLIC2 Uncharacterized protein CLIC2                                                           | IPI00514835   | 1.18 | 0.5325 |
| NLN cDNA FLJ14696 fis, clone NT2RP2005775, highly similar to NEUROLYSIN                       | IPI00872224   | 1.08 | 0.5325 |
| ACOX3 Isoform 1 of Peroxisomal acyl-coenzyme A oxidase 3                                      | IPI00020226   | 1.07 | 0.5325 |
| MUC1 Isoform 1 of Mucin-1                                                                     | IPI00013955   | 1.41 | 0.5341 |
| PPP2R4 Protein phosphatase 2A activator, regulatory subunit 4                                 | IPI00893197   | 1.18 | 0.5341 |
| RPL28 Ribosomal protein L28 variant (Fragment)                                                | IPI00816097   | 1.15 | 0.5341 |
| TMEM14C Transmembrane protein 14C                                                             | IPI00009346   | 1.14 | 0.5341 |
| CRP Isoform 1 of C-reactive protein precursor                                                 | IPI00022389   | 1.14 | 0.5341 |

|                                                                                              |             |      |        |
|----------------------------------------------------------------------------------------------|-------------|------|--------|
| BAX Isoform Alpha of Apoptosis regulator BAX                                                 | IPI00443773 | 1.15 | 0.5356 |
| RPL5 60S ribosomal protein L5                                                                | IPI00000494 | 1.40 | 0.5363 |
| F13A1 coagulation factor XIII A1 subunit precursor                                           | IPI00884176 | 1.72 | 0.5367 |
| LBP Lipopolysaccharide-binding protein precursor                                             | IPI00032311 | 1.08 | 0.5420 |
| UQCRB Cytochrome b-c1 complex subunit 7                                                      | IPI00220416 | 1.02 | 0.5438 |
| DDC Aromatic-L-amino-acid decarboxylase                                                      | IPI00025394 | 1.25 | 0.5440 |
| LYZ Lysozyme C precursor                                                                     | IPI00019038 | 1.01 | 0.5473 |
| DHODH Dihydroorotate dehydrogenase, mitochondrial                                            | IPI00024462 | 1.05 | 0.5500 |
| ATP5D ATP synthase subunit delta, mitochondrial precursor                                    | IPI00024920 | 1.09 | 0.5507 |
| ATP6V1C1 Uncharacterized protein ATP6V1C1                                                    | IPI00873237 | 1.24 | 0.5509 |
| GNB2L1 Guanine nucleotide-binding protein subunit beta-2-like 1                              | IPI00848226 | 1.16 | 0.5536 |
| GNB1 Guanine nucleotide binding protein (G protein), beta polypeptide 1                      | IPI00639998 | 1.25 | 0.5544 |
| BSG Isoform 1 of Basigin precursor                                                           | IPI00218019 | 1.13 | 0.5544 |
| DPEP1 Dipeptidase 1 precursor                                                                | IPI00059476 | 1.58 | 0.5559 |
| HADHA Trifunctional enzyme subunit alpha, mitochondrial precursor                            | IPI00031522 | 1.26 | 0.5561 |
| GCDH Isoform Long of Glutaryl-CoA dehydrogenase, mitochondrial precursor                     | IPI00024317 | 1.07 | 0.5611 |
| DCTN3 Isoform 3 of Dynactin subunit 3                                                        | IPI00514971 | 1.10 | 0.5697 |
| RPL3 60S ribosomal protein L3                                                                | IPI00550021 | 1.14 | 0.5754 |
| PSMA4 Proteasome subunit beta type                                                           | IPI00789638 | 1.14 | 0.5754 |
| THBS1 Thrombospondin-1 precursor                                                             | IPI00296099 | 1.10 | 0.5754 |
| SRPRB 11 kDa protein                                                                         | IPI00797747 | 1.10 | 0.5754 |
| FTCD Isoform D of Formimidoyltransferase-cyclodeaminase                                      | IPI00218977 | 1.05 | 0.5793 |
| CTSA cathepsin A isoform a precursor                                                         | IPI00640525 | 1.26 | 0.5825 |
| - 48 kDa protein                                                                             | IPI00005800 | 1.20 | 0.5843 |
| GGT1 Isoform 1 of Gamma-glutamyltranspeptidase 1 precursor                                   | IPI00018901 | 1.23 | 0.5851 |
| MPST 3-mercaptopyruvate sulfurtransferase                                                    | IPI00165360 | 1.25 | 0.5857 |
| ATP6V1B2 Vacuolar ATP synthase subunit B, brain isoform                                      | IPI00007812 | 1.25 | 0.5867 |
| COX4I1 Cytochrome c oxidase subunit 4 isoform 1, mitochondrial precursor                     | IPI00006579 | 1.09 | 0.5867 |
| BPGM Bisphosphoglycerate mutase                                                              | IPI00215979 | 1.01 | 0.6041 |
| COMMD3 COMM domain-containing protein 3                                                      | IPI00015773 | 1.07 | 0.6051 |
| - Uncharacterized protein ENSP00000260968                                                    | IPI00479058 | 1.22 | 0.6053 |
| TOMM70A Mitochondrial precursor proteins import receptor                                     | IPI00015602 | 1.30 | 0.6063 |
| TSPAN9 Tetraspanin-9                                                                         | IPI00027437 | 1.29 | 0.6063 |
| SLC25A10 Isoform 1 of Mitochondrial dicarboxylate carrier                                    | IPI00015920 | 1.33 | 0.6070 |
| C21orf33 Isoform Long of ES1 protein homolog, mitochondrial precursor                        | IPI00024913 | 1.09 | 0.6169 |
| TPP1 Isoform 2 of Tripeptidyl-peptidase 1 precursor                                          | IPI00554617 | 1.10 | 0.6179 |
| IPI00216024                                                                                  | IPI00216024 | 1.39 | 0.6180 |
| NDUFA9 NADH dehydrogenase [ubiquinone] 1 alpha subcomplex subunit 9, mitochondrial precursor | IPI00003968 | 1.18 | 0.6180 |
| CBX3;LOC653972 Chromobox protein homolog 3                                                   | IPI00297579 | 1.09 | 0.6186 |
| COPS8 COP9 signalosome subunit 8 isoform 2                                                   | IPI00377080 | 1.09 | 0.6186 |
| DNAJC11 Isoform 2 of DnaJ homolog subfamily C member 11                                      | IPI00607744 | 1.06 | 0.6186 |
| SUSD2 Sushi domain-containing protein 2                                                      | IPI00021302 | 1.36 | 0.6189 |
| IFITM1 Interferon-induced transmembrane protein 1                                            | IPI00300620 | 1.35 | 0.6189 |
| PDLIM5 PDZ and LIM domain 5 isoform e                                                        | IPI00103146 | 1.17 | 0.6189 |
| KHK 31 kDa protein                                                                           | IPI00893008 | 1.29 | 0.6271 |
| UBE2L3 Ubiquitin-conjugating enzyme E2 L3                                                    | IPI00021347 | 1.07 | 0.6271 |
| PYGB Glycogen phosphorylase, brain form                                                      | IPI00004358 | 1.40 | 0.6274 |
| TMED7;TICAM2 Toll-like receptor adapter molecule 2                                           | IPI00428967 | 1.18 | 0.6274 |
| ERAP1 Isoform 1 of Endoplasmic reticulum aminopeptidase 1                                    | IPI00477831 | 1.17 | 0.6274 |
| CTSC Dipeptidyl-peptidase 1 precursor                                                        | IPI00022810 | 1.05 | 0.6386 |
| SCPEP1 Isoform 1 of Retinoid-inducible serine carboxypeptidase precursor                     | IPI00012426 | 1.31 | 0.6427 |
| PPAP2B Lipid phosphate phosphohydrolase 3                                                    | IPI00021453 | 1.77 | 0.6430 |
| ACE2 Isoform 1 of Angiotensin-converting enzyme 2 precursor                                  | IPI00465187 | 1.54 | 0.6443 |
| RPS4X 40S ribosomal protein S4, X isoform                                                    | IPI00217030 | 1.17 | 0.6483 |
| PTGES2 Prostaglandin E synthase 2                                                            | IPI00303568 | 1.09 | 0.6483 |
| CAPZA1 Uncharacterized protein CAPZA1 (Fragment)                                             | IPI00873484 | 1.08 | 0.6483 |
| TFRC Transferrin receptor protein 1                                                          | IPI00022462 | 1.03 | 0.6631 |
| STX12 Syntaxin 12                                                                            | IPI00513853 | 1.08 | 0.6631 |
| PTGDS Prostaglandin D2 synthase 21kDa                                                        | IPI00513767 | 1.29 | 0.6634 |

|                                                                                               |             |      |        |
|-----------------------------------------------------------------------------------------------|-------------|------|--------|
| PARVA Isoform 1 of Alpha-parvin                                                               | IPI00018963 | 1.21 | 0.6634 |
| NPHS1;PRODH2 Isoform 1 of Nephrin                                                             | IPI00747010 | 1.09 | 0.6634 |
| RPL31 ribosomal protein L31 isoform 3                                                         | IPI00856058 | 1.05 | 0.6634 |
| ZMPSTE24 CAAX prenyl protease 1 homolog                                                       | IPI00027180 | 1.03 | 0.6634 |
| ATP5J ATP synthase, H+ transporting, mitochondrial F0 complex, subunit F6 isoform b precursor | IPI00456008 | 1.08 | 0.6659 |
| HMGCS2 Hydroxymethylglutaryl-CoA synthase, mitochondrial precursor                            | IPI00008934 | 1.13 | 0.6694 |
| - Ig kappa chain V-IV region Len                                                              | IPI00387120 | 1.52 | 0.6784 |
| MYL1 Myosin light chain 1, skeletal muscle isoform                                            | IPI00216070 | 1.44 | 0.6784 |
| M6PRBP1 Isoform B of Mannose-6-phosphate receptor-binding protein 1                           | IPI00303882 | 1.35 | 0.6784 |
| CNN3 46 kDa protein                                                                           | IPI00873410 | 1.27 | 0.6784 |
| SYPL1 Isoform 2 of Synaptophysin-like protein 1                                               | IPI00335277 | 1.24 | 0.6784 |
| PURB Transcriptional activator protein Pur-beta                                               | IPI00045051 | 1.24 | 0.6784 |
| RPS6 Ribosomal protein S6                                                                     | IPI00643522 | 1.21 | 0.6784 |
| EBP 3-beta-hydroxysteroid-Delta(8),Delta(7)-isomerase                                         | IPI00008599 | 1.20 | 0.6784 |
| - cDNA FLJ59582, highly similar to Ras-related protein Rab-3A                                 | IPI00910170 | 1.20 | 0.6784 |
| MACF1 620 kDa protein                                                                         | IPI00902728 | 1.19 | 0.6784 |
| EPB41 Isoform 4 of Protein 4.1                                                                | IPI00218699 | 1.19 | 0.6784 |
| HNRNPU Isoform Long of Heterogeneous nuclear ribonucleoprotein U                              | IPI00883857 | 1.18 | 0.6784 |
| PCMT1 Isoform 2 of Protein-L-isoaspartate(D-aspartate) O-methyltransferase                    | IPI00828189 | 1.15 | 0.6784 |
| PARP4 Poly [ADP-ribose] polymerase 4                                                          | IPI00296909 | 1.14 | 0.6784 |
| PPIH Peptidyl-prolyl cis-trans isomerase H                                                    | IPI00007346 | 1.13 | 0.6784 |
| COPS4 COP9 signalosome complex subunit 4                                                      | IPI00171844 | 1.13 | 0.6784 |
| LOC643287 similar to prothymosin alpha                                                        | IPI00737372 | 1.13 | 0.6784 |
| EPB42 Isoform Short of Erythrocyte membrane protein band 4.2                                  | IPI00827872 | 1.13 | 0.6784 |
| SNX12 Isoform 2 of Sorting nexin-12                                                           | IPI00844112 | 1.13 | 0.6784 |
| MTP18 16 kDa protein                                                                          | IPI00879813 | 1.13 | 0.6784 |
| ACAT2 Acetyl-CoA acetyltransferase, cytosolic                                                 | IPI00291419 | 1.13 | 0.6784 |
| EPRS Bifunctional aminoacyl-tRNA synthetase                                                   | IPI00013452 | 1.11 | 0.6784 |
| LOC285053 similar to ribosomal protein L18a isoform 1                                         | IPI00472864 | 1.11 | 0.6784 |
| ERAP2 Isoform 1 of Endoplasmic reticulum aminopeptidase 2                                     | IPI00465261 | 1.10 | 0.6784 |
| CCDC47 Isoform 2 of Coiled-coil domain-containing protein 47                                  | IPI00743775 | 1.10 | 0.6784 |
| RAB39 Ras-related protein Rab-39A                                                             | IPI00001618 | 1.10 | 0.6784 |
| PLTP Isoform 1 of Phospholipid transfer protein precursor                                     | IPI00643034 | 1.09 | 0.6784 |
| PDCD10 15 kDa protein                                                                         | IPI00790953 | 1.09 | 0.6784 |
| SURF4 Surfeit 4                                                                               | IPI00399142 | 1.08 | 0.6784 |
| ASPN ASPN protein                                                                             | IPI00418431 | 1.08 | 0.6784 |
| HNRNPM Isoform 1 of Heterogeneous nuclear ribonucleoprotein M                                 | IPI00171903 | 1.08 | 0.6784 |
| SEC31A Isoform 4 of Protein transport protein Sec31A                                          | IPI00515103 | 1.08 | 0.6784 |
| HDHD2 Isoform 1 of Haloacid dehalogenase-like hydrolase domain-containing protein 2           | IPI00783874 | 1.08 | 0.6784 |
| REXO2 Isoform 2 of Oligoribonuclease, mitochondrial precursor (Fragment)                      | IPI00217330 | 1.07 | 0.6784 |
| UNC84B cDNA FLJ55508, highly similar to Sad1/unc-84-like protein 2                            | IPI00295940 | 1.07 | 0.6784 |
| RNPEP Uncharacterized protein RNPEP                                                           | IPI00647400 | 1.07 | 0.6784 |
| GDPD3 Isoform 1 of Glycerophosphodiester phosphodiesterase domain-containing protein 3        | IPI00549640 | 1.07 | 0.6784 |
| CORO1C Coronin-1C_i3 protein                                                                  | IPI00867509 | 1.07 | 0.6784 |
| LOC653658 similar to 40S ribosomal protein S23                                                | IPI00888094 | 1.07 | 0.6784 |
| CRB2 Isoform 3 of Crumbs homolog 2                                                            | IPI00607804 | 1.06 | 0.6784 |
| ACP2 Lysosomal acid phosphatase                                                               | IPI00003807 | 1.05 | 0.6784 |
| S100A8 Protein S100-A8                                                                        | IPI00007047 | 1.05 | 0.6784 |
| ALDH1A3 Aldehyde dehydrogenase 1A3                                                            | IPI00026663 | 1.05 | 0.6784 |
| FHIT Bis(5-adenosyl)-triphosphatase                                                           | IPI00028095 | 1.05 | 0.6784 |
| VBP1 Von Hippel-Lindau binding protein 1                                                      | IPI00334159 | 1.05 | 0.6784 |
| GMFB 18 kDa protein                                                                           | IPI00549557 | 1.05 | 0.6784 |
| CD163 Isoform 2 of Scavenger receptor cysteine-rich type 1 protein M130                       | IPI00759642 | 1.05 | 0.6784 |
| ARHGDI2 26 kDa protein                                                                        | IPI00796541 | 1.14 | 0.6785 |
| XPNPEP2 Xaa-Pro aminopeptidase 2 precursor                                                    | IPI00439344 | 1.38 | 0.6795 |
| GLG1 79 kDa protein                                                                           | IPI00647145 | 1.08 | 0.6799 |
| NIPSNAP3A 32 kDa protein                                                                      | IPI00871176 | 1.12 | 0.6800 |
| ARMET Protein ARMET                                                                           | IPI00328748 | 1.07 | 0.6801 |
| ALDH1A1 Retinal dehydrogenase 1                                                               | IPI00218914 | 1.54 | 0.6803 |



|                                                                                                 |             |      |        |
|-------------------------------------------------------------------------------------------------|-------------|------|--------|
| CCT6A T-complex protein 1 subunit zeta                                                          | IPI00027626 | 1.01 | 0.6809 |
| NDUFB7 NADH dehydrogenase [ubiquinone] 1 beta subcomplex subunit 7                              | IPI00219772 | 1.05 | 0.6828 |
| MGST3 Microsomal glutathione S-transferase 3                                                    | IPI00024266 | 1.11 | 0.6830 |
| GPD2 Isoform 1 of Glycerol-3-phosphate dehydrogenase, mitochondrial precursor                   | IPI00017895 | 1.07 | 0.6830 |
| SLC25A12 Calcium-binding mitochondrial carrier protein Aralar1                                  | IPI00386271 | 1.29 | 0.6833 |
| ENPP6 Ectonucleotide pyrophosphatase/phosphodiesterase family member 6 precursor                | IPI00157414 | 1.31 | 0.6873 |
| RPS20 16 kDa protein                                                                            | IPI00794659 | 1.23 | 0.6873 |
| MTCH1 Isoform 2 of Mitochondrial carrier homolog 1                                              | IPI00479697 | 1.13 | 0.6873 |
| VWF cDNA FLJ59036, highly similar to von Willebrand factor                                      | IPI00788786 | 1.18 | 0.6881 |
| MUPCDH Isoform 1 of Mucin and cadherin-like protein                                             | IPI00336112 | 1.32 | 0.6883 |
| RPS14 40S ribosomal protein S14                                                                 | IPI00026271 | 1.17 | 0.6883 |
| SLC9A3R2 solute carrier family 9 isoform 3 regulator 2 isoform b                                | IPI00645815 | 1.84 | 0.6905 |
| CMPK1 cytidine monophosphate (UMP-CMP) kinase 1, cytosolic                                      | IPI00219953 | 1.09 | 0.6908 |
| LTA4H Isoform 2 of Leukotriene A-4 hydrolase                                                    | IPI00514090 | 1.05 | 0.7080 |
| ASPH Aspartyl/asparaginyl beta-hydroxylase                                                      | IPI00294834 | 1.02 | 0.7080 |
| FAM151A Isoform 1 of Protein FAM151A                                                            | IPI00300865 | 1.50 | 0.7146 |
| CTSZ Cathepsin Z precursor                                                                      | IPI00002745 | 1.11 | 0.7147 |
| NDUFB8 NADH dehydrogenase                                                                       | IPI00642807 | 1.12 | 0.7150 |
| DLD Dihydrolipoyl dehydrogenase, mitochondrial precursor                                        | IPI00015911 | 1.07 | 0.7163 |
| SQRDL Sulfide:quinone oxidoreductase, mitochondrial precursor                                   | IPI00009634 | 1.10 | 0.7170 |
| CTSD Cathepsin D precursor                                                                      | IPI00011229 | 1.03 | 0.7170 |
| HAO2 Hydroxyacid oxidase 2                                                                      | IPI00641158 | 1.13 | 0.7177 |
| - cDNA FLJ57678, highly similar to Transmembrane protein 16F                                    | IPI00910110 | 1.33 | 0.7270 |
| DNAJB11 DnaJ homolog subfamily B member 11                                                      | IPI00008454 | 1.16 | 0.7305 |
| UBE2N Ubiquitin carrier protein (Fragment)                                                      | IPI00874051 | 1.20 | 0.7307 |
| FCGRT IgG receptor FcRn large subunit p51 (Fragment)                                            | IPI00026646 | 1.20 | 0.7307 |
| ITGB2 Integrin beta chain, beta 2 variant (Fragment)                                            | IPI00746851 | 1.04 | 0.7397 |
| RBBP4 cDNA FLJ53908, highly similar to Histone-binding protein RBBP4                            | IPI00877934 | 1.04 | 0.7397 |
| C20orf116 Isoform 1 of Uncharacterized protein C20orf116                                        | IPI00028387 | 1.03 | 0.7397 |
| BAT5 HLA-B associated transcript 5                                                              | IPI00791049 | 1.03 | 0.7397 |
| ADAM10 Uncharacterized protein ADAM10                                                           | IPI00794448 | 1.03 | 0.7397 |
| PDLIM1 PDZ and LIM domain protein 1                                                             | IPI00010414 | 1.02 | 0.7397 |
| C19orf10 UPF0556 protein C19orf10                                                               | IPI00056357 | 1.02 | 0.7397 |
| QPCTL 33 kDa protein                                                                            | IPI00061796 | 1.02 | 0.7397 |
| BRI3BP BRI3-binding protein                                                                     | IPI00103599 | 1.02 | 0.7397 |
| RTN2 Isoform RTN2-C of Reticulon-2                                                              | IPI00410134 | 1.02 | 0.7397 |
| COPZ1 13 kDa protein                                                                            | IPI00792696 | 1.02 | 0.7456 |
| PECI Peroxisomal 3,2-trans-enoyl-CoA isomerase                                                  | IPI00639841 | 1.11 | 0.7467 |
| COL6A2 Isoform 2C2 of Collagen alpha-2(VI) chain precursor                                      | IPI00304840 | 1.05 | 0.7467 |
| CHCHD3 Coiled-coil-helix-coiled-coil-helix domain-containing protein 3, mitochondrial precursor | IPI00015833 | 1.07 | 0.7478 |
| ANXA3 Uncharacterized protein ANXA3 (Fragment)                                                  | IPI00745868 | 1.06 | 0.7491 |
| CYP4A11 Cytochrome P450 4A11 precursor                                                          | IPI00872799 | 1.10 | 0.7501 |
| ISOC2 Isoform 1 of Isochorismatase domain-containing protein 2, mitochondrial precursor         | IPI00551022 | 1.03 | 0.7509 |
| CTNNA1 Isoform 2 of Catenin alpha-1                                                             | IPI00473136 | 1.03 | 0.7510 |
| VCL Isoform 2 of Vinculin                                                                       | IPI00307162 | 1.02 | 0.7510 |
| SERPINA1 Isoform 1 of Alpha-1-antitrypsin precursor                                             | IPI00553177 | 1.52 | 0.7513 |
| SLC25A5 ADP/ATP translocase 2                                                                   | IPI00007188 | 1.18 | 0.7513 |
| HSPA9 Stress-70 protein, mitochondrial precursor                                                | IPI00007765 | 1.10 | 0.7513 |
| AIFM1 Isoform 3 of Apoptosis-inducing factor 1, mitochondrial precursor                         | IPI00157908 | 1.06 | 0.7513 |
| ARPC1B Actin-related protein 2/3 complex subunit 1B                                             | IPI00005160 | 1.36 | 0.7648 |
| IGJ immunoglobulin J chain                                                                      | IPI00178926 | 1.74 | 0.7745 |
| - cDNA FLJ78321                                                                                 | IPI00877095 | 1.03 | 0.7832 |
| CCT4 T-complex protein 1, delta subunit                                                         | IPI00873222 | 1.06 | 0.7843 |
| SEPT7 Isoform 2 of Septin-7                                                                     | IPI00816201 | 1.20 | 0.7845 |
| TPD52L2 Isoform 1 of Tumor protein D54                                                          | IPI00306825 | 1.18 | 0.7848 |
| IPI00873444                                                                                     | IPI00873444 | 1.04 | 0.7856 |
| NNT NAD(P) transhydrogenase, mitochondrial                                                      | IPI00337541 | 1.04 | 0.7856 |
| SLC4A1 Band 3 anion transport protein                                                           | IPI00791534 | 1.11 | 0.7857 |
| SFXN1 Sideroflexin-1                                                                            | IPI00009368 | 1.04 | 0.7857 |

|                                                                                                 |             |      |        |
|-------------------------------------------------------------------------------------------------|-------------|------|--------|
| AADACL1 arylacetamide deacetylase-like 1                                                        | IPI00002230 | 1.04 | 0.7965 |
| UMOD Isoform 3 of Uromodulin                                                                    | IPI00744076 | 1.07 | 0.7968 |
| JUP Junction plakoglobin                                                                        | IPI00554711 | 1.05 | 0.8035 |
| LYPLA2 Acyl-protein thioesterase 2                                                              | IPI00027032 | 1.02 | 0.8035 |
| GOSR2 17 kDa protein                                                                            | IPI00795521 | 1.01 | 0.8035 |
| RBP4 Retinol-binding protein 4                                                                  | IPI00022420 | 1.60 | 0.8088 |
| - RPS9 protein (Fragment)                                                                       | IPI00847192 | 1.02 | 0.8154 |
| ANXA7 annexin VII isoform 2                                                                     | IPI00514510 | 1.06 | 0.8183 |
| - Uncharacterized protein ENSP00000381447 (Fragment)                                            | IPI00872387 | 1.06 | 0.8195 |
| ATP6V1D Vacuolar proton pump subunit D                                                          | IPI00001568 | 1.08 | 0.8197 |
| PDCD6 Programmed cell death protein 6                                                           | IPI00025277 | 1.07 | 0.8201 |
| ITGA3 Isoform Alpha-3B of Integrin alpha-3 precursor                                            | IPI00290043 | 1.13 | 0.8206 |
| IGHA1;IGHV3OR16-13 IGH A1 protein                                                               | IPI00430842 | 2.13 | 0.8207 |
| RAP1B Ras-related protein Rap-1b precursor                                                      | IPI00015148 | 1.24 | 0.8208 |
| TXNDC12 Thioredoxin domain-containing protein 12 precursor                                      | IPI00026328 | 1.05 | 0.8421 |
| PCDH24 Protocadherin-24 precursor                                                               | IPI00307446 | 1.09 | 0.8494 |
| SEPT2 cDNA FLJ55467, highly similar to Septin-2                                                 | IPI00871851 | 1.36 | 0.8545 |
| SERPINB6 Serpin B6                                                                              | IPI00749398 | 1.59 | 0.8557 |
| ACTR3 Actin-related protein 3                                                                   | IPI00028091 | 1.06 | 0.8560 |
| HADHB Trifunctional enzyme subunit beta, mitochondrial precursor                                | IPI00022793 | 1.10 | 0.8561 |
| ANXA1 Annexin A1                                                                                | IPI00218918 | 1.06 | 0.8561 |
| CRYAA 17 kDa protein                                                                            | IPI00796777 | 1.18 | 0.8630 |
| ATP1B3 15 kDa protein                                                                           | IPI00789521 | 1.27 | 0.8634 |
| DSTN destrin isoform b                                                                          | IPI00845388 | 1.04 | 0.8634 |
| RPS8 40S ribosomal protein S8                                                                   | IPI00216587 | 1.12 | 0.8635 |
| PTBP1 Isoform 2 of Polypyrimidine tract-binding protein 1                                       | IPI00334175 | 1.11 | 0.8635 |
| PROM1 Prominin-1 precursor                                                                      | IPI00012540 | 1.08 | 0.8635 |
| TXNDC13 Thioredoxin domain-containing protein 13                                                | IPI00100247 | 1.06 | 0.8705 |
| TMPO Lamina-associated polypeptide 2, isoforms beta/gamma variant (Fragment)                    | IPI00873716 | 1.14 | 0.8714 |
| THSD7A Thrombospondin type-1 domain-containing protein 7A                                       | IPI00741524 | 1.06 | 0.8769 |
| RPS5 40S ribosomal protein S5                                                                   | IPI00008433 | 1.07 | 0.8770 |
| TXNRD1 Isoform 5 of Thioredoxin reductase 1, cytoplasmic                                        | IPI00554786 | 1.01 | 0.8890 |
| BLVRB Flavin reductase                                                                          | IPI00783862 | 1.10 | 0.8917 |
| RTN4 Isoform 2 of Reticulon-4                                                                   | IPI00298289 | 1.08 | 0.8917 |
| CCT7 T-complex protein 1 subunit eta                                                            | IPI00018465 | 1.11 | 0.8917 |
| KRT8 Keratin, type II cytoskeletal 8                                                            | IPI00554648 | 1.03 | 0.8919 |
| RAB7A Ras-related protein Rab-7a                                                                | IPI00016342 | 1.03 | 0.8919 |
| GYPA Glycophorin-A                                                                              | IPI00298800 | 1.02 | 0.9086 |
| CYFIP1 Isoform 2 of Cytoplasmic FMR1-interacting protein 1                                      | IPI00550212 | 1.12 | 0.9087 |
| LDHAL3 hypothetical protein                                                                     | IPI00888324 | 1.08 | 0.9087 |
| BCKDHA cDNA FLJ45695 fis, clone FEBRA2013570, highly similar to 2- oxoisovalerate dehydrogenase | IPI00444329 | 1.02 | 0.9087 |
| RPL27 60S ribosomal protein L27                                                                 | IPI00382885 | 1.03 | 0.9176 |
| MRC1 Macrophage mannose receptor 1                                                              | IPI00027848 | 1.16 | 0.9178 |
| NME3 Nucleoside diphosphate kinase 3                                                            | IPI00012315 | 1.05 | 0.9206 |
| DNPEP 52 kDa protein                                                                            | IPI00658215 | 1.03 | 0.9206 |
| LOC100130562 hypothetical protein isoform 2                                                     | IPI00888909 | 1.05 | 0.9244 |
| GLYATL1 Isoform 2 of Glycine N-acyltransferase-like protein 1                                   | IPI00168156 | 1.04 | 0.9263 |
| IQGAP1 Ras GTPase-activating-like protein IQGAP1                                                | IPI00009342 | 1.03 | 0.9276 |
| RAB11B Ras-related protein Rab-11B                                                              | IPI00020436 | 1.04 | 0.9278 |
| HSP90B1 Endoplasmic precursor                                                                   | IPI00027230 | 1.03 | 0.9278 |
| PURA Transcriptional activator protein Pur-alpha                                                | IPI00023591 | 1.44 | 0.9444 |
| GSTZ1 Uncharacterized protein GSTZ1 (Fragment)                                                  | IPI00874143 | 1.12 | 0.9444 |
| ASNA1 Arsenical pump-driving ATPase                                                             | IPI00013466 | 1.07 | 0.9444 |
| LXN Latexin                                                                                     | IPI00106687 | 1.07 | 0.9444 |
| CPNE8 CDNA FLJ25727 fis, clone TST05479                                                         | IPI00334276 | 1.02 | 0.9444 |
| CBR4 Isoform 1 of Carbonyl reductase 4                                                          | IPI00384297 | 1.02 | 0.9444 |
| EIF3I Eukaryotic translation initiation factor 3 subunit I                                      | IPI00012795 | 1.01 | 0.9444 |
| CTSG Cathepsin G                                                                                | IPI00028064 | 1.29 | 0.9444 |
| BPI Bactericidal permeability-increasing protein                                                | IPI00827847 | 1.16 | 0.9444 |

|                                                                                   |             |      |        |
|-----------------------------------------------------------------------------------|-------------|------|--------|
| RPL31 60S ribosomal protein L31                                                   | IPI00026302 | 1.15 | 0.9444 |
| RPL31 ribosomal protein L31 isoform 2                                             | IPI00848331 | 1.15 | 0.9444 |
| HNRNPD Isoform 4 of Heterogeneous nuclear ribonucleoprotein D0                    | IPI00220685 | 1.13 | 0.9444 |
| - cDNA FLJ53069, highly similar to AP-2 complex subunit mu-1                      | IPI00909772 | 1.11 | 0.9444 |
| CR1 Complement receptor type 1                                                    | IPI00412546 | 1.08 | 0.9444 |
| PDIA5 Protein disulfide-isomerase A5                                              | IPI00031479 | 1.08 | 0.9444 |
| ANK1 Isoform Er16 of Ankyrin-1                                                    | IPI00646300 | 1.07 | 0.9444 |
| PSMC6 proteasome 26S ATPase subunit 6                                             | IPI00021926 | 1.07 | 0.9444 |
| FAAH Fatty-acid amide hydrolase 1                                                 | IPI00012107 | 1.03 | 0.9444 |
| - cDNA FLJ52895, highly similar to Carbonic anhydrase 3                           | IPI00909152 | 1.03 | 0.9444 |
| CSTB Cystatin-B                                                                   | IPI00021828 | 1.02 | 0.9444 |
| CTNND1 Isoform 3AB of Catenin delta-1                                             | IPI00219734 | 1.02 | 0.9444 |
| ITGAM Integrin, alpha M                                                           | IPI00645887 | 1.01 | 0.9444 |
| - cDNA FLJ51212, moderately similar to Brain acid soluble protein 1               | IPI00908521 | 1.09 | 0.9543 |
| DUSP3 23 kDa protein                                                              | IPI00790757 | 1.06 | 0.9543 |
| CHMP4B Charged multivesicular body protein 4b                                     | IPI00025974 | 1.01 | 0.9543 |
| SNRPA1 U2 small nuclear ribonucleoprotein A                                       | IPI00297477 | 1.05 | 0.9569 |
| IKIP Isoform 4 of Inhibitor of nuclear factor kappa-B kinase-interacting protein  | IPI00043598 | 1.03 | 0.9570 |
| EEF1G 50 kDa protein                                                              | IPI00747497 | 1.11 | 0.9622 |
| ADD1 Isoform 1 of Alpha-adducin                                                   | IPI00019901 | 1.03 | 0.9628 |
| ENG Isoform Long of Endoglin                                                      | IPI00017567 | 1.12 | 0.9633 |
| CDH13 Cadherin-13 precursor                                                       | IPI00024046 | 1.05 | 0.9633 |
| CLIC1 Chloride intracellular channel protein 1                                    | IPI00010896 | 1.02 | 0.9635 |
| CAP1 Adenylyl cyclase-associated protein 1                                        | IPI00008274 | 1.03 | 0.9636 |
| SFXN2 Sideroflexin-2                                                              | IPI00043564 | 1.06 | 0.9637 |
| PDHB Isoform 1 of Pyruvate dehydrogenase E1 component subunit beta, mitochondrial | IPI00003925 | 1.04 | 0.9639 |
| ATP6V0C Vacuolar ATP synthase 16 kDa proteolipid subunit                          | IPI00018855 | 1.27 | 1.0000 |
| TMED9 transmembrane emp24 protein transport domain containing 9                   | IPI00023542 | 1.17 | 1.0000 |
| CCT8 T-complex protein 1 subunit theta                                            | IPI00784090 | 1.13 | 1.0000 |
| - Transthyretin                                                                   | IPI00855916 | 1.09 | 1.0000 |
| SDCBP Syntenin isoform 3                                                          | IPI00479018 | 1.08 | 1.0000 |
| RAB8B 6 kDa protein                                                               | IPI00789827 | 1.05 | 1.0000 |
| COX5A Cytochrome c oxidase subunit 5A, mitochondrial precursor                    | IPI00025086 | 1.05 | 1.0000 |
| RPS13 40S ribosomal protein S13                                                   | IPI00221089 | 1.04 | 1.0000 |

Supplementary Table 5: Proteins listed in the 12 top-ranked enrichment pathways

| Gene Ontology Term (biological process) | Proteins                                                                                           | Count | p value  |
|-----------------------------------------|----------------------------------------------------------------------------------------------------|-------|----------|
| glucose metabolic process               | ALDOA, LDHB, SORD, TALDO1, PGD, ALDOB, UGDH, FBP1, TPI1, PGLS, PKM2, PGM1, GAPDH, UGP2, MDH1, ENO1 | 16    | 2.13E-15 |
| glucose catabolic process               | ALDOA, LDHB, TPI1, PGLS, TALDO1, PKM2, ALDOB, PGM1, PGD, GAPDH, MDH1, ENO1                         | 12    | 8.14E-15 |
| alcohol catabolic process               | ALDOA, LDHB, TPI1, PGLS, TALDO1, SORD, PKM2, ALDOB, PGM1, PGD, GAPDH, MDH1, ENO1                   | 13    | 1.05E-14 |
| cellular carbohydrate catabolic process | ALDOA, LDHB, TPI1, PGLS, TALDO1, SORD, PKM2, ALDOB, PGM1, PGD, GAPDH, MDH1, ENO1                   | 13    | 1.91E-14 |
| hexose catabolic process                | ALDOA, LDHB, TPI1, PGLS, TALDO1, PKM2, ALDOB, PGM1, PGD, GAPDH, MDH1, ENO1                         | 12    | 6.25E-14 |
| hexose metabolic process                | ALDOA, LDHB, SORD, TALDO1, PGD, ALDOB, UGDH, FBP1, TPI1, PGLS, PKM2, PGM1, GAPDH, UGP2, MDH1, ENO1 | 16    | 6.27E-14 |
| monosaccharide catabolic process        | ALDOA, LDHB, TPI1, PGLS, TALDO1, PKM2, ALDOB, PGM1, PGD, GAPDH, MDH1, ENO1                         | 12    | 8.71E-14 |
| carbohydrate catabolic process          | ALDOA, LDHB, TPI1, PGLS, TALDO1, SORD, PKM2, ALDOB, PGM1, PGD, GAPDH, MDH1, ENO1                   | 13    | 4.14E-13 |
| monosaccharide metabolic process        | ALDOA, LDHB, SORD, TALDO1, PGD, ALDOB, UGDH, FBP1, TPI1, PGLS, PKM2, PGM1, GAPDH, UGP2, MDH1, ENO1 | 16    | 5.31E-13 |
| coenzyme metabolic process              | LDHB, TALDO1, ACO1, ALDOB, PGD, GSTT1, SOD1, HAGH, TPI1, PGLS, QPRT, GLO1, MDH1                    | 13    | 2.43E-11 |
| cofactor metabolic process              | LDHB, ALAD, TALDO1, ACO1, ALDOB, PGD, GSTT1, SOD1, HAGH, TPI1, PGLS, QPRT, GLO1, MDH1              | 14    | 2.62E-11 |
| glycolysis                              | ALDOA, LDHB, TPI1, PKM2, ALDOB, PGM1, GAPDH, MDH1, ENO1                                            | 9     | 1.15E-10 |

Supplementary Table 6: Clinical characteristics of Joslin Medalist for metabolomics analysis

| Characteristics                                | Protected group (N=16) | Risk group (N=13) | P value |
|------------------------------------------------|------------------------|-------------------|---------|
| Age (yr)                                       | 63(57, 70)             | 73(66, 77)        | 0.02    |
| Female                                         | 50.00%                 | 38.00%            | 0.71    |
| Duration of Disease (yr)                       | 53(51, 59)             | 54(52, 62)        | 0.31    |
| Age at Diagnosis (yr)                          | 6(4, 11)               | 14(10, 19)        | 0.01    |
| HbA1c (%)                                      | 8.8(8.0, 9.1)          | 6.5(6.0, 6.9)     | <0.0001 |
| ACR ( $\mu\text{g}/\text{mg}$ )                | 16(8, 23)              | 187(96, 590)      | <0.0001 |
| eGFR ( $\text{mL}/\text{min}/1.73\text{m}^2$ ) | 93(63, 97)             | 28(16, 31)        | <0.0001 |
| Serum creatinine (mg/dl)                       | 0.9(0.7, 1.1)          | 2.2(1.7, 3.5)     | <0.0001 |
| Hypertension                                   | 50%                    | 56%               | 0.11    |

Values are expressed as n (%) or median (quartile 1, quartile 3). HbA1c, hemoglobin A1c; ACR, albumin/creatinine ratio, eGFR, estimated glomerular filtration rate.

P values were calculated using Fisher's or Wilcoxon Exact.

Supplementary Table 7: Plasma metabolomic profiling from Joslin Medalist between the Protected and Non-protected group

| <b>(A) Plasma metabolites in glycolysis, glucose metabolism and TCA pathways</b> |           |                   |                               |                  |                                                    |
|----------------------------------------------------------------------------------|-----------|-------------------|-------------------------------|------------------|----------------------------------------------------|
| Metabolites                                                                      | HMDB ID   | detectability [%] | Ratio                         | Nominal          | Significance adjusted for the multiple testing (q) |
|                                                                                  |           |                   | (Protected vs. Non-Protected) | significance (p) |                                                    |
| sorbitol                                                                         | HMDB00247 | 100               | 0.24                          | 1.93E-07         | 1.0 x 10 <sup>-5</sup>                             |
| aconitate                                                                        | HMDB00072 | 100               | 0.28                          | 1.18E-06         | 3.0 x 10 <sup>-5</sup>                             |
| isocitrate                                                                       | HMDB00193 | 100               | 0.66                          | 2.01E-04         | 2.2 x 10 <sup>-3</sup>                             |
| fumarate/maleate/alpha-ketoisovalerate                                           | HMDB00134 | 100               | 0.41                          | 1.45E-03         | 9.0 x 10 <sup>-3</sup>                             |
| alpha-ketoglutarate                                                              | HMDB00208 | 100               | 0.77                          | 3.19E-03         | 0.018                                              |
| serine                                                                           | HMDB00187 | 100               | 1.30                          | 4.45E-03         | 0.024                                              |
| F16DP/F26DP/G16DP                                                                | HMDB01058 | 100               | 0.63                          | 1.77E-02         | 0.065                                              |
| F1P/F6P/G1P/G6P                                                                  | HMDB01401 | 100               | 0.76                          | 5.53E-02         | 0.145                                              |
| lactate                                                                          | HMDB00190 | 100               | 0.78                          | 9.49E-02         | 0.176                                              |
| DHAP/glyceraldehyde 3P                                                           | HMDB01473 | 100               | 1.11                          | 2.53E-01         | 0.323                                              |
| PEP                                                                              | HMDB00263 | 100               | 1.15                          | 2.67E-01         | 0.325                                              |
| succinate                                                                        | HMDB00254 | 100               | 1.06                          | 3.39E-01         | 0.361                                              |
| citrate                                                                          | HMDB00094 | 100               | 0.96                          | 6.86E-01         | 0.515                                              |
| ribose-5-P/ribose5-P                                                             | HMDB01548 | 100               | 1.01                          | 7.22E-01         | 0.537                                              |
| 3-phosphoglycerate                                                               | HMDB00807 | 100               | 1.05                          | 7.66E-01         | 0.554                                              |
| fructose/glucose/galactose                                                       | HMDB00122 | 100               | 0.99                          | 9.60E-01         | 0.605                                              |

| <b>(B) Other plasma metabolites</b>                             |            |                   |                               |                  |                                                    |
|-----------------------------------------------------------------|------------|-------------------|-------------------------------|------------------|----------------------------------------------------|
| Metabolites                                                     | HMDB ID    | detectability [%] | Ratio                         | Nominal          | Significance adjusted for the multiple testing (q) |
|                                                                 |            |                   | (Protected vs. Non-Protected) | significance (p) |                                                    |
| allantoin                                                       | HMDB00462  | 100               | 0.21                          | 2.23E-07         | 1.0 x 10 <sup>-5</sup>                             |
| adipate                                                         | HMDB00448  | 100               | 0.41                          | 2.72E-07         | 1.0 x 10 <sup>-5</sup>                             |
| creatinine                                                      | HMDB00562  | 100               | 0.55                          | 8.55E-07         | 3.0 x 10 <sup>-5</sup>                             |
| glucuronate                                                     | HMDB00127  | 100               | 0.24                          | 9.28E-07         | 3.0 x 10 <sup>-5</sup>                             |
| cytosine                                                        | HMDB00630  | 100               | 0.31                          | 3.71E-06         | 8.0 x 10 <sup>-5</sup>                             |
| SDMA                                                            | HMDB03334  | 100               | 0.46                          | 8.32E-06         | 1.6 x 10 <sup>-4</sup>                             |
| cystathionine                                                   | HMDB00099  | 100               | 0.10                          | 9.38E-06         | 1.6 x 10 <sup>-4</sup>                             |
| kynurenic acid                                                  | HMDB00715  | 100               | 0.20                          | 1.17E-05         | 1.8 x 10 <sup>-4</sup>                             |
| 5-methyl-THF                                                    | HMDB01396  | 100               | 0.25                          | 3.07E-05         | 4.3 x 10 <sup>-4</sup>                             |
| trimethylamine-N-oxide                                          | HMDB00925  | 100               | 0.45                          | 7.05E-05         | 9.1 x 10 <sup>-4</sup>                             |
| quinolinate                                                     | HMDB00232  | 100               | 0.23                          | 1.44E-04         | 1.7 x 10 <sup>-3</sup>                             |
| lactose                                                         | HMDB00186  | 100               | 0.42                          | 3.23E-04         | 3.1 x 10 <sup>-3</sup>                             |
| aminoisobutyric acid                                            | HMDB02166  | 100               | 0.27                          | 3.47E-04         | 3.1 x 10 <sup>-3</sup>                             |
| xanthosine                                                      | HMDB00299  | 100               | 0.51                          | 4.14E-04         | 3.4 x 10 <sup>-3</sup>                             |
| urate                                                           | HMDB00289  | 100               | 0.80                          | 4.15E-04         | 3.4 x 10 <sup>-3</sup>                             |
| oxalate                                                         | HMDB02329  | 100               | 0.62                          | 4.37E-04         | 3.4 x 10 <sup>-3</sup>                             |
| butyrylcarnitine/isobutyrylcarnitine                            | HMDB02013/ | 100               | 0.40                          | 5.41E-04         | 4.0 x 10 <sup>-3</sup>                             |
| tryptophan                                                      | HMDB00929  | 100               | 1.58                          | 5.99E-04         | 4.2 x 10 <sup>-3</sup>                             |
| acetylglycine                                                   | HMDB00532  | 100               | 0.44                          | 1.03E-03         | 6.9 x 10 <sup>-3</sup>                             |
| acetylcarnitine                                                 | HMDB00201  | 100               | 0.61                          | 1.28E-03         | 8.3 x 10 <sup>-3</sup>                             |
| adenine                                                         | HMDB00034  | 100               | 0.69                          | 2.46E-03         | 0.015                                              |
| orotate                                                         | HMDB00226  | 100               | 0.54                          | 3.78E-03         | 0.021                                              |
| valerylcarnitine/ isovalerylcarnitine/ 2-methylbutyrylcarnitine | HMDB13128/ | 100               | 0.56                          | 4.65E-03         | 0.024                                              |
| butyrobetaine                                                   | HMDB01161  | 100               | 0.69                          | 4.77E-03         | 0.024                                              |
| kynurenine                                                      | HMDB00684  | 100               | 0.73                          | 4.92E-03         | 0.024                                              |
| malonylcarnitine                                                | HMDB02095  | 100               | 0.28                          | 5.74E-03         | 0.027                                              |
| hippurate                                                       | HMDB00714  | 100               | 0.19                          | 6.08E-03         | 0.027                                              |
| choline                                                         | HMDB00097  | 100               | 0.79                          | 6.13E-03         | 0.027                                              |
| sucrose                                                         | HMDB00258  | 100               | 0.53                          | 9.57E-03         | 0.041                                              |
| ADP                                                             | HMDB01341  | 100               | 1.60                          | 1.00E-02         | 0.042                                              |

|                       |           |     |      |          |       |
|-----------------------|-----------|-----|------|----------|-------|
| lysine                | HMDB00182 | 100 | 1.24 | 1.22E-02 | 0.050 |
| GDP                   | HMDB01201 | 100 | 1.56 | 1.33E-02 | 0.053 |
| thymine               | HMDB00262 | 100 | 0.76 | 1.36E-02 | 0.053 |
| 2-deoxycytidine       | HMDB00014 | 100 | 0.82 | 1.72E-02 | 0.065 |
| guanosine             | HMDB00133 | 100 | 1.43 | 1.98E-02 | 0.071 |
| arginine              | HMDB00517 | 100 | 1.34 | 2.62E-02 | 0.092 |
| anthranilic acid      | HMDB01123 | 100 | 0.74 | 2.74E-02 | 0.095 |
| propionylcarnitine    | HMDB00824 | 100 | 0.69 | 3.14E-02 | 0.105 |
| C56:7 TAG             | HMDB05462 | 100 | 0.71 | 3.17E-02 | 0.105 |
| C54:5 TAG             | HMDB05385 | 100 | 0.81 | 3.76E-02 | 0.122 |
| C36:3 PC              | n/a       | 100 | 0.63 | 3.87E-02 | 0.122 |
| C54:6 TAG             | HMDB05391 | 100 | 0.76 | 3.94E-02 | 0.122 |
| NAD                   | HMDB00902 | 100 | 0.64 | 4.14E-02 | 0.126 |
| cAMP                  | HMDB00058 | 100 | 0.75 | 4.22E-02 | 0.126 |
| C20:5 CE              | HMDB06731 | 100 | 1.67 | 4.31E-02 | 0.127 |
| C24:1 SM              | HMDB12107 | 100 | 0.88 | 4.69E-02 | 0.135 |
| C52:5 TAG             | HMDB05380 | 100 | 0.87 | 4.90E-02 | 0.138 |
| valine                | HMDB00883 | 100 | 1.21 | 4.99E-02 | 0.138 |
| C54:7 TAG             | HMDB05447 | 100 | 0.66 | 5.39E-02 | 0.145 |
| C56:9 TAG             | HMDB05448 | 100 | 0.84 | 5.51E-02 | 0.145 |
| ADMA                  | HMDB01539 | 100 | 0.83 | 5.59E-02 | 0.145 |
| GMP                   | HMDB01397 | 100 | 1.41 | 5.69E-02 | 0.145 |
| heptanoylcarnitine    | HMDB13238 | 100 | 0.53 | 6.22E-02 | 0.150 |
| citrulline            | HMDB00904 | 100 | 0.73 | 6.26E-02 | 0.150 |
| glutamine             | HMDB00641 | 100 | 1.14 | 6.29E-02 | 0.150 |
| dimethylglycine       | HMDB00092 | 100 | 0.78 | 6.31E-02 | 0.150 |
| NMMA                  | n/a       | 100 | 0.83 | 6.41E-02 | 0.150 |
| hypoxanthine          | HMDB00157 | 100 | 0.37 | 6.47E-02 | 0.150 |
| C36:1 DAG             | HMDB07216 | 100 | 0.87 | 6.60E-02 | 0.151 |
| C54:1 TAG             | HMDB05395 | 100 | 0.81 | 6.75E-02 | 0.152 |
| inosine               | HMDB00195 | 100 | 0.32 | 6.98E-02 | 0.155 |
| UMP                   | HMDB00288 | 100 | 1.38 | 7.08E-02 | 0.155 |
| histidine             | HMDB00177 | 100 | 1.14 | 7.26E-02 | 0.155 |
| C18:1 CE              | HMDB00918 | 100 | 1.35 | 7.87E-02 | 0.165 |
| pantothenate          | HMDB00210 | 100 | 0.64 | 8.14E-02 | 0.169 |
| thyroxine             | HMDB00248 | 100 | 1.19 | 8.31E-02 | 0.170 |
| C34:1 PC              | HMDB07972 | 100 | 0.68 | 8.54E-02 | 0.170 |
| pyroglutamic acid     | HMDB00267 | 100 | 0.73 | 8.54E-02 | 0.170 |
| C56:2 TAG             | HMDB05404 | 100 | 0.83 | 8.71E-02 | 0.171 |
| spermidine            | HMDB01257 | 100 | 1.20 | 8.90E-02 | 0.172 |
| thiamine              | HMDB00235 | 100 | 0.09 | 8.96E-02 | 0.172 |
| C18:0 LPC             | HMDB10384 | 100 | 1.11 | 9.16E-02 | 0.174 |
| C58:11 TAG            | HMDB10531 | 100 | 1.14 | 9.28E-02 | 0.174 |
| C18:0 SM              | HMDB01348 | 100 | 0.91 | 9.63E-02 | 0.176 |
| uridine               | HMDB00296 | 100 | 1.23 | 9.82E-02 | 0.177 |
| hydroxyphenylpyruvate | HMDB06915 | 100 | 0.76 | 1.08E-01 | 0.191 |
| oleylcarnitine        | HMDB05065 | 100 | 0.63 | 1.08E-01 | 0.191 |
| malate                | HMDB00156 | 100 | 0.81 | 1.10E-01 | 0.192 |
| uracil                | HMDB00300 | 100 | 0.66 | 1.13E-01 | 0.193 |
| C22:1 SM              | HMDB12104 | 100 | 1.24 | 1.13E-01 | 0.193 |
| C18:0 LPE             | HMDB11130 | 100 | 1.16 | 1.14E-01 | 0.193 |
| C14:0 CE              | HMDB06725 | 100 | 1.29 | 1.16E-01 | 0.194 |
| UDP                   | HMDB00295 | 100 | 1.27 | 1.19E-01 | 0.196 |
| UDP-glucuronate       | HMDB00935 | 100 | 1.23 | 1.24E-01 | 0.203 |
| C24:0 SM              | HMDB11697 | 100 | 1.10 | 1.30E-01 | 0.211 |
| C54:10 TAG            | n/a       | 100 | 0.76 | 1.33E-01 | 0.212 |
| linoleyl_carnitine    | HMDB06469 | 100 | 0.67 | 1.33E-01 | 0.212 |
| C52:2 TAG             | HMDB05369 | 100 | 0.79 | 1.35E-01 | 0.212 |

|                                          |           |     |      |          |       |
|------------------------------------------|-----------|-----|------|----------|-------|
| histamine                                | HMDB00870 | 100 | 1.37 | 1.41E-01 | 0.219 |
| C34:1 DAG                                | HMDB07102 | 100 | 0.70 | 1.46E-01 | 0.224 |
| C32:0 PC                                 | HMDB07871 | 100 | 1.16 | 1.48E-01 | 0.226 |
| threonine                                | HMDB00167 | 100 | 1.11 | 1.64E-01 | 0.247 |
| glutamate                                | HMDB00148 | 100 | 0.56 | 1.74E-01 | 0.261 |
| C56:1 TAG                                | HMDB05396 | 100 | 0.82 | 1.81E-01 | 0.265 |
| niacinamide                              | HMDB01406 | 100 | 1.17 | 1.84E-01 | 0.265 |
| C52:3 TAG                                | HMDB05384 | 100 | 0.76 | 1.84E-01 | 0.265 |
| C56:3 TAG                                | HMDB05410 | 100 | 0.85 | 1.85E-01 | 0.265 |
| serotonin                                | HMDB00259 | 100 | 1.73 | 1.86E-01 | 0.265 |
| C18:0 CE                                 | HMDB10368 | 100 | 1.13 | 1.91E-01 | 0.271 |
| propionate                               | HMDB00237 | 100 | 0.80 | 1.95E-01 | 0.273 |
| salicylurate                             | HMDB00840 | 100 | 0.52 | 2.00E-01 | 0.278 |
| phenylalanine                            | HMDB00159 | 100 | 0.90 | 2.13E-01 | 0.292 |
| C48:0 TAG                                | HMDB05356 | 100 | 1.32 | 2.17E-01 | 0.296 |
| palmitoylcarnitine                       | HMDB00222 | 100 | 0.77 | 2.28E-01 | 0.309 |
| 4-pyridoxate                             | HMDB00017 | 100 | 0.24 | 2.35E-01 | 0.310 |
| methionine                               | HMDB00696 | 100 | 1.08 | 2.35E-01 | 0.310 |
| C36:1 PC                                 | HMDB08038 | 100 | 1.15 | 2.53E-01 | 0.323 |
| glycocholate                             | HMDB00138 | 100 | 1.77 | 2.55E-01 | 0.323 |
| C56:4 TAG                                | HMDB05398 | 100 | 0.87 | 2.56E-01 | 0.323 |
| methionine sulfoxide                     | HMDB02005 | 100 | 0.83 | 2.61E-01 | 0.323 |
| tyrosine                                 | HMDB00158 | 100 | 1.10 | 2.61E-01 | 0.323 |
| C38:3 PC                                 | n/a       | 100 | 0.86 | 2.62E-01 | 0.323 |
| C52:1 TAG                                | HMDB05367 | 100 | 0.89 | 2.66E-01 | 0.325 |
| C34:2 DAG                                | HMDB07103 | 100 | 1.11 | 2.72E-01 | 0.328 |
| 3-hydroxykynurenate                      | HMDB00732 | 100 | 1.13 | 2.75E-01 | 0.329 |
| lauroylcarnitine                         | HMDB02250 | 100 | 0.66 | 2.85E-01 | 0.335 |
| C50:1 TAG                                | HMDB05360 | 100 | 0.79 | 2.89E-01 | 0.338 |
| C22:0 SM                                 | HMDB12103 | 100 | 0.95 | 2.96E-01 | 0.343 |
| C50:0 TAG                                | HMDB05357 | 100 | 1.03 | 3.09E-01 | 0.355 |
| leucine                                  | HMDB00687 | 100 | 1.11 | 3.10E-01 | 0.355 |
| aspartate                                | HMDB00191 | 100 | 0.83 | 3.13E-01 | 0.355 |
| C38:2 PC                                 | HMDB08270 | 100 | 0.95 | 3.17E-01 | 0.357 |
| C38:4 PC                                 | HMDB08048 | 100 | 0.95 | 3.20E-01 | 0.358 |
| alpha-glycerophosphocholine              | HMDB00086 | 100 | 0.92 | 3.29E-01 | 0.360 |
| C58:10 TAG                               | HMDB05476 | 100 | 0.88 | 3.31E-01 | 0.360 |
| C58:12 TAG                               | HMDB10514 | 100 | 0.83 | 3.32E-01 | 0.360 |
| C48:1 TAG                                | HMDB05359 | 100 | 1.06 | 3.34E-01 | 0.360 |
| C20:3 CE                                 | HMDB06736 | 100 | 1.07 | 3.39E-01 | 0.361 |
| glycodeoxycholate/glycochenodeoxycholate | HMDB00631 | 100 | 0.96 | 3.50E-01 | 0.369 |
| C40:6 PC                                 | HMDB08057 | 100 | 0.88 | 3.53E-01 | 0.369 |
| C54:4 TAG                                | HMDB05370 | 100 | 0.83 | 3.54E-01 | 0.369 |
| carnitine                                | HMDB00062 | 100 | 0.91 | 3.59E-01 | 0.372 |
| C20:3 LPC                                | HMDB10388 | 100 | 0.86 | 3.62E-01 | 0.372 |
| C18:2 LPE                                | HMDB11507 | 100 | 1.07 | 3.64E-01 | 0.372 |
| isoleucine                               | HMDB00172 | 100 | 1.08 | 3.71E-01 | 0.374 |
| C50:3 TAG                                | HMDB05433 | 100 | 0.88 | 3.72E-01 | 0.374 |
| taurodeoxycholate/taurochenodeoxycholate | HMDB00896 | 100 | 0.58 | 3.73E-01 | 0.374 |
| C20:4 LPC                                | HMDB10395 | 100 | 1.06 | 3.80E-01 | 0.379 |
| pipecolic acid                           | HMDB00070 | 100 | 1.29 | 3.89E-01 | 0.383 |
| C18:2 CE                                 | HMDB00610 | 100 | 1.05 | 3.91E-01 | 0.383 |
| C18:2 LPC                                | HMDB10386 | 100 | 1.06 | 3.91E-01 | 0.383 |
| NADP                                     | HMDB00217 | 100 | 1.12 | 3.95E-01 | 0.384 |
| nonanoylcarnitine                        | HMDB13288 | 100 | 0.79 | 3.98E-01 | 0.385 |
| C16:1 SM                                 | n/a       | 100 | 0.97 | 4.02E-01 | 0.386 |
| C34:2 PC                                 | HMDB07973 | 100 | 0.97 | 4.05E-01 | 0.386 |
| C16:1 LPC                                | HMDB10383 | 100 | 1.09 | 4.09E-01 | 0.386 |



|                                |           |     |      |          |       |
|--------------------------------|-----------|-----|------|----------|-------|
| C18:1 LPC                      | HMDB02815 | 100 | 1.06 | 4.10E-01 | 0.386 |
| C16:0 LPC                      | HMDB10382 | 100 | 1.04 | 4.15E-01 | 0.388 |
| C22:6 LPE                      | HMDB11526 | 100 | 1.06 | 4.18E-01 | 0.388 |
| hexanoylcarnitine              | HMDB00705 | 100 | 0.62 | 4.19E-01 | 0.388 |
| myristoylcarnitine             | HMDB05066 | 100 | 0.78 | 4.24E-01 | 0.390 |
| decanoylcarnitine              | HMDB00651 | 100 | 0.59 | 4.39E-01 | 0.398 |
| C50:4 TAG                      | HMDB05435 | 100 | 0.79 | 4.41E-01 | 0.398 |
| C20:5 LPC                      | HMDB10397 | 100 | 1.05 | 4.43E-01 | 0.398 |
| C54:8 TAG                      | HMDB10518 | 100 | 0.77 | 4.50E-01 | 0.402 |
| creatine                       | HMDB00064 | 100 | 0.91 | 4.53E-01 | 0.403 |
| C16:1 CE                       | HMDB00658 | 100 | 1.13 | 4.58E-01 | 0.405 |
| C46:1 TAG                      | HMDB10412 | 100 | 1.06 | 4.63E-01 | 0.407 |
| C18:3 CE                       | HMDB10370 | 100 | 0.98 | 4.66E-01 | 0.407 |
| C16:0 CE                       | HMDB00885 | 100 | 1.05 | 4.77E-01 | 0.415 |
| chenodeoxycholate/deoxycholate | HMDB00518 | 100 | 1.05 | 4.82E-01 | 0.416 |
| phosphoethanolamine            | HMDB00224 | 100 | 1.07 | 4.92E-01 | 0.419 |
| betaine                        | HMDB00043 | 100 | 1.03 | 4.93E-01 | 0.419 |
| 1-methylhistamine              | HMDB00898 | 100 | 1.14 | 4.94E-01 | 0.419 |
| C20:4 CE                       | HMDB06726 | 100 | 1.05 | 5.05E-01 | 0.427 |
| phosphocholine                 | HMDB01565 | 100 | 1.10 | 5.10E-01 | 0.427 |
| C56:8 TAG                      | HMDB05392 | 100 | 1.07 | 5.18E-01 | 0.431 |
| asparagine                     | HMDB00168 | 100 | 1.04 | 5.32E-01 | 0.440 |
| C58:9 TAG                      | HMDB05463 | 100 | 0.92 | 5.44E-01 | 0.448 |
| C52:6 TAG                      | HMDB05436 | 100 | 0.92 | 5.48E-01 | 0.449 |
| C34:4 PC                       | HMDB07883 | 100 | 1.02 | 5.52E-01 | 0.449 |
| octanoylcarnitine              | HMDB00791 | 100 | 0.53 | 5.55E-01 | 0.449 |
| C58:8 TAG                      | HMDB05413 | 100 | 1.05 | 5.74E-01 | 0.460 |
| alanine                        | HMDB00161 | 100 | 1.04 | 5.76E-01 | 0.460 |
| C58:6 TAG                      | HMDB05458 | 100 | 0.91 | 5.77E-01 | 0.460 |
| ornithine                      | HMDB00214 | 100 | 0.96 | 5.85E-01 | 0.464 |
| alpha-glycerophosphate         | HMDB00126 | 100 | 1.04 | 5.94E-01 | 0.466 |
| AMP                            | HMDB00045 | 100 | 1.02 | 6.03E-01 | 0.466 |
| C18:2 SM                       | HMDB12101 | 100 | 1.05 | 6.04E-01 | 0.466 |
| C14:0 SM                       | HMDB12097 | 100 | 1.04 | 6.04E-01 | 0.466 |
| xanthine                       | HMDB00292 | 100 | 1.03 | 6.05E-01 | 0.466 |
| C36:2 PC                       | HMDB08039 | 100 | 0.98 | 6.05E-01 | 0.466 |
| C22:6 LPC                      | HMDB10404 | 100 | 1.00 | 6.59E-01 | 0.502 |
| C36:2 DAG                      | HMDB07218 | 100 | 0.89 | 6.68E-01 | 0.507 |
| C16:0 LPE                      | HMDB11503 | 100 | 0.97 | 6.80E-01 | 0.514 |
| C16:0 SM                       | HMDB10169 | 100 | 0.99 | 7.14E-01 | 0.533 |
| C36:4 PC-A                     | HMDB07983 | 100 | 0.99 | 7.40E-01 | 0.543 |
| C38:5 PC                       | HMDB08114 | 100 | 0.97 | 7.41E-01 | 0.543 |
| 1-methylnicotinamide           | HMDB00699 | 100 | 1.07 | 7.69E-01 | 0.554 |
| cotinine                       | HMDB01046 | 100 | 4.36 | 7.70E-01 | 0.554 |
| adenosine                      | HMDB00050 | 100 | 0.34 | 7.75E-01 | 0.555 |
| C18:1 SM                       | HMDB12101 | 100 | 0.98 | 7.78E-01 | 0.555 |
| C32:2 PC                       | HMDB07874 | 100 | 1.00 | 7.82E-01 | 0.555 |
| C48:3 TAG                      | HMDB05432 | 100 | 0.95 | 7.93E-01 | 0.560 |
| cis/trans-hydroxyproline       | HMDB00725 | 100 | 1.14 | 7.99E-01 | 0.560 |
| C22:6 CE                       | HMDB06733 | 100 | 0.99 | 8.00E-01 | 0.560 |
| C20:4 LPE                      | HMDB11517 | 100 | 0.98 | 8.12E-01 | 0.564 |
| C48:4 TAG                      | n/a       | 100 | 0.95 | 8.13E-01 | 0.564 |
| C48:2 TAG                      | HMDB05376 | 100 | 0.95 | 8.22E-01 | 0.568 |
| C56:6 TAG                      | HMDB05456 | 100 | 0.95 | 8.48E-01 | 0.583 |
| C32:1 PC                       | HMDB07873 | 100 | 0.97 | 8.59E-01 | 0.586 |
| beta-alanine                   | HMDB00056 | 100 | 0.96 | 8.66E-01 | 0.586 |
| homovanillate                  | HMDB00118 | 100 | 1.00 | 8.68E-01 | 0.586 |
| C50:2 TAG                      | HMDB05377 | 100 | 0.94 | 8.86E-01 | 0.586 |

|                           |           |     |      |          |       |
|---------------------------|-----------|-----|------|----------|-------|
| sarcosine                 | HMDB00271 | 100 | 1.00 | 8.90E-01 | 0.586 |
| glycine                   | HMDB00123 | 100 | 1.00 | 8.90E-01 | 0.586 |
| taurine                   | HMDB00251 | 100 | 0.96 | 8.91E-01 | 0.586 |
| C38:6 PC                  | HMDB07991 | 100 | 1.00 | 8.91E-01 | 0.586 |
| glucose                   | HMDB03345 | 100 | 0.97 | 8.96E-01 | 0.586 |
| C36:4 PC-B                | HMDB08138 | 100 | 1.00 | 8.98E-01 | 0.586 |
| C50:5 TAG                 | HMDB10471 | 100 | 0.91 | 9.04E-01 | 0.587 |
| hexacosanoyl_carnitine    | HMDB06347 | 100 | 1.00 | 9.06E-01 | 0.587 |
| C34:3 PC                  | HMDB08006 | 100 | 1.00 | 9.12E-01 | 0.588 |
| stearoylcarnitine         | HMDB00848 | 100 | 0.91 | 9.21E-01 | 0.592 |
| C54:2 TAG                 | HMDB05403 | 100 | 0.93 | 9.51E-01 | 0.605 |
| C18:1 LPE                 | HMDB11506 | 100 | 0.98 | 9.52E-01 | 0.605 |
| C58:7 TAG                 | n/a       | 100 | 0.97 | 9.61E-01 | 0.605 |
| proline                   | HMDB00162 | 100 | 0.99 | 9.65E-01 | 0.605 |
| C46:2 TAG                 | HMDB10419 | 100 | 0.90 | 9.70E-01 | 0.605 |
| C52:4 TAG                 | HMDB05363 | 100 | 0.90 | 9.84E-01 | 0.612 |
| putrescine                | HMDB01414 | 100 | 1.06 | 9.91E-01 | 0.614 |
| cytidine                  | HMDB00089 | 97  | 0.37 | 2.78E-04 | 0.003 |
| IMP                       | HMDB00175 | 97  | 1.41 | 2.82E-01 | 0.334 |
| C14:0 LPC                 | HMDB10379 | 97  | 1.17 | 3.28E-01 | 0.360 |
| C44:1 TAG                 | n/a       | 93  | 0.63 | 4.32E-01 | 0.395 |
| 5-HIAA                    | HMDB00763 | 90  | 1.52 | 2.52E-01 | 0.323 |
| taurocholate              | HMDB00036 | 86  | 0.46 | 5.09E-01 | 0.427 |
| glycerol                  | HMDB00131 | 86  | 1.19 | 6.56E-01 | 0.502 |
| C56:5 TAG                 | HMDB05406 | 83  | 0.96 | 8.95E-01 | 0.586 |
| C60:12 TAG                | HMDB05478 | 83  | 0.97 | 9.61E-01 | 0.605 |
| glutathione oxidized      | HMDB03337 | 76  | 1.41 | 2.35E-01 | 0.310 |
| cholate                   | HMDB00619 | 76  | 1.06 | 8.94E-01 | 0.586 |
| UDP-galactose/UDP-glucose | HMDB00286 | 72  | 1.13 | 7.29E-01 | 0.539 |
| xanthurenate              | HMDB00881 | 69  | 0.63 | 7.18E-02 | 0.155 |
| C44:0 TAG                 | n/a       | 69  | 0.89 | 7.60E-01 | 0.554 |
| C42:0 TAG                 | n/a       | 66  | NA   | NA       | NA    |
| acetylcholine             | HMDB00895 | 62  | NA   | NA       | NA    |
| carnitine C20:4           | n/a       | 62  | NA   | NA       | NA    |
| C46:0 TAG                 | HMDB10411 | 55  | NA   | NA       | NA    |
| CDP                       | HMDB01546 | 48  | NA   | NA       | NA    |
| homocystine               | HMDB00676 | 48  | NA   | NA       | NA    |
| anserine                  | HMDB00194 | 45  | NA   | NA       | NA    |
| guanine                   | HMDB00132 | 45  | NA   | NA       | NA    |
| N-carbamoyl-beta-alanine  | HMDB00026 | 45  | NA   | NA       | NA    |
| cAMP                      | HMDB00058 | 41  | NA   | NA       | NA    |
| arachidonyl carnitine     | HMDB06455 | 24  | NA   | NA       | NA    |
| 2-deoxyadenosine          | HMDB00101 | 14  | NA   | NA       | NA    |
| carosine                  | HMDB00033 | 14  | NA   | NA       | NA    |
| erythrose-4-phosphate     | HMDB01321 | 14  | NA   | NA       | NA    |
| 5-adenosylhomocysteine    | HMDB00939 | 10  | NA   | NA       | NA    |
| GABA                      | HMDB00112 | 10  | NA   | NA       | NA    |
| 2-aminoadipate            | HMDB00510 | 3   | NA   | NA       | NA    |
| adenylosuccinate          | HMDB00536 | 3   | NA   | NA       | NA    |
| C54:3 TAG                 | HMDB05405 | 3   | NA   | NA       | NA    |
| 3-hydroxyanthranilic acid | HMDB01476 | 0   | NA   | NA       | NA    |
| 5-aminolevulinic acid     | HMDB01149 | 0   | NA   | NA       | NA    |
| 5-hydroxytryptophan       | HMDB00472 | 0   | NA   | NA       | NA    |
| argininosuccinate         | HMDB00052 | 0   | NA   | NA       | NA    |
| bilirubin                 | HMDB00054 | 0   | NA   | NA       | NA    |
| CMP                       | HMDB00095 | 0   | NA   | NA       | NA    |
| cobalamin                 | HMDB02174 | 0   | NA   | NA       | NA    |
| dCMP                      | HMDB01202 | 0   | NA   | NA       | NA    |

|                               |           |   |    |    |    |
|-------------------------------|-----------|---|----|----|----|
| dTMP                          | HMDB01227 | 0 | NA | NA | NA |
| dUMP                          | HMDB01409 | 0 | NA | NA | NA |
| folate                        | HMDB00121 | 0 | NA | NA | NA |
| glutathione reduced           | HMDB00125 | 0 | NA | NA | NA |
| homocysteine                  | HMDB00742 | 0 | NA | NA | NA |
| homogentistate                | HMDB00130 | 0 | NA | NA | NA |
| methyl-hydroxyisobutyric acid | n/a       | 0 | NA | NA | NA |
| methylmalonate                | HMDB00202 | 0 | NA | NA | NA |
| mevalonic acid                | HMDB00227 | 0 | NA | NA | NA |
| nicotinate                    | HMDB01488 | 0 | NA | NA | NA |
| nicotinic acid mononucleotide | HMDB01132 | 0 | NA | NA | NA |
| phosphotyrosine               | HMDB06049 | 0 | NA | NA | NA |
| pyridoxal 5-phosphate         | HMDB01491 | 0 | NA | NA | NA |
| pyruvate                      | HMDB00243 | 0 | NA | NA | NA |
| thymidine                     | HMDB00273 | 0 | NA | NA | NA |
| triiodothyronine              | HMDB00265 | 0 | NA | NA | NA |
| XMP                           | HMDB01554 | 0 | NA | NA | NA |

HMDB ID - Human Metabolome Database identifier; TCA - tricarboxylic acid cycle;

q, positive false discovery rate adjusted significance for multiple testing.

Supplemental Table 8: Joslin Medalist kidney pathology assessment

| <b>SID</b> | <b>RPS DN Class</b> | <b>Global GS (%)</b> | <b>GBM thickness (microns±SD)</b> | <b>Glomerular Tuft Mean Area (µm<sup>2</sup>)</b> | <b>IFTA (0-3)</b> |
|------------|---------------------|----------------------|-----------------------------------|---------------------------------------------------|-------------------|
| G15        | 0                   | 0.19                 | 303±31                            | 17083                                             | 1                 |
| G3         | I                   | 0.23                 | 452±68                            | 24125                                             | 1                 |
| G4         | I                   | 0.19                 | 493±80                            | 23589                                             | 1                 |
| G7         | I                   | 0.03                 | 443±115                           | 24728                                             | 1                 |
| G19        | I                   | 0.07                 | 480±115                           | 23239                                             | 1                 |
| G27        | 0                   | 0.05                 | 379±39                            | 21907                                             | 1                 |
| G13        | I or IIA            | 0.11                 | 535±80                            | 22894                                             | 2                 |
| G9         | IIB                 | 0.11                 | 421±75                            | 17219                                             | 1                 |
| G12        | IIB                 | 0.13                 | 479±98                            | 15566                                             | 1                 |
| G17        | IIB                 | 0.04                 | 509±126                           | 18350                                             | 1                 |
| G26        | IIB                 | 0.25                 | 493±157                           | 17099                                             | 2                 |
| G29        | IIB                 | 0.49                 | 1008±226                          | 35946                                             | 3                 |
| G24        | IIB                 | 0.65                 | 527±89                            | 13822                                             | 2                 |
| G5         | III                 | 0.39                 | 696±245                           | 30554                                             | 2                 |
| G10        | III                 | 0.16                 | 691±198                           | 24972                                             | 2                 |
| G18        | IIB                 | 0.06                 | 514±94                            | 22695                                             | 2                 |
| G20        | III                 | 0.35                 | 711±132                           | 29082                                             | 2                 |
| G22        | III                 | 0.09                 | 625±165                           | 20007                                             | 1                 |

RPS, Renal Pathology Society; GS, glomerulosclerosis; GBM, glomerular basement membrane; IFTA, interstitial fibrosis and tubular atrophy; IAH, index of arteriolar hyalinosis; SD, standard deviation.

| <b>Mesangial expansion</b>        | <b>Interstitial Inflammation</b> | <b>Arteriosclerosis</b> | <b>Arteriolar Hyalinosis</b> | <b>IAH</b> |
|-----------------------------------|----------------------------------|-------------------------|------------------------------|------------|
| no-mild                           | 1                                | 2                       | 2                            | 1.63       |
| no                                | 0                                | 2                       | 0                            | 1.25       |
| no                                | 1                                | 1                       | 1                            | 1.36       |
| no                                | 0                                | 0                       | 0                            | 1.07       |
| no-mild                           | 1                                | 2                       | 2                            | 1.69       |
| no                                | 1                                | 2                       | 1                            | 1.10       |
| mild-moderate                     | 1                                | 2                       | 2                            | 2.02       |
| moderate                          | 1                                | 1                       | 1                            | 1.45       |
| mild-moderate                     | 1                                | 2                       | 2                            | 1.88       |
| moderate                          | 1                                | 2                       | 2                            | 1.78       |
| moderate                          | 1                                | 2                       | 2                            | 2.07       |
| moderate                          | 1                                | 2                       | 2                            | 2.32       |
| moderate                          | 1                                | 2                       | 1                            | 1.52       |
| severe                            | 1                                | 2                       | 2                            | 2.34       |
| severe with focal nodules         | 1                                | 2                       | 2                            | 2.73       |
| moderate with focal nodules       | 1                                | 2                       | 2                            | 2.34       |
| moderate with focal small nodules | 1                                | 2                       | 2                            | 2.81       |
| moderate with focal small nodules | 1                                | 2                       | 2                            | 2.35       |

Supplemental Table 9: Clinical characteristics of non-Medalist individual with diabetes

| <b>SID</b> | <b>Diabetes</b> | <b>Duration (years)</b> | <b>Age (years)</b> | <b>Sex</b> | <b>BMI (kg/m<sup>2</sup>)</b> | <b>RPS DN Class</b> | <b>Glucose (mg/dL)</b> | <b>Creatinine (mg/dL)</b> | <b>HTN (yrs)</b> |
|------------|-----------------|-------------------------|--------------------|------------|-------------------------------|---------------------|------------------------|---------------------------|------------------|
| T1DK1      | T1DM            | 21                      | 32                 | M          | 20.6                          | IIB                 | 159                    | 1.8                       | Yes              |
| T1DK2      | T1DM            | 26                      | 49                 | F          | 41.5                          | IIB                 | 281                    | 4.3                       | Yes              |
| T2DK1      | T2DM            | 3                       | 50                 | M          | 29.2                          | IV                  | 202                    | 7.5                       | Yes              |
| T2DK2      | T2DM            | 10                      | 43                 | M          | 29.6                          | IIA                 | 295                    | 4.5                       | Yes              |
| T2DK3      | T2DM            | 15                      | 62                 | F          | 40.2                          | IIA                 | 214                    | 1.5                       | Yes              |
| T2DK4      | T2DM            | 10                      | 70                 | F          | 25.7                          | 0                   | 334                    | 1.4                       | UNK              |
| T2DK5      | T2DM            | 15                      | 61                 | M          | 20                            | I                   | 138                    | 2.4                       | Yes              |
| T2DK6      | T2DM            | 4                       | 64                 | M          | 28.2                          | IIA                 | 358                    | 1.5                       | Yes              |
| T2DK7      | T2DM            | 1 month                 | 62                 | M          | 23.2                          | 0                   | 146                    | 1.3                       | Yes              |
| T2DK8      | T2DM            | 18                      | 63                 | F          | 28                            | IIA                 | 137                    | 0.6                       | Yes              |

RPS DN class, Renal Pathology Society DN Classification; HTN, hypertension; UNK, unknown.

Supplementary Table 10: Metabolic characteristics of nondiabetic and diabetic WT and PPKM2KO mice

| Characteristics               | Nondiabetic      |                   | Diabetic                        |                                     |
|-------------------------------|------------------|-------------------|---------------------------------|-------------------------------------|
|                               | WT               | PPKM2KO           | WT                              | PPKM2KO                             |
| Body weight (g)               | 37.3±6.6 (n=14)  | 40.9±5.1 (n=11)   | 26.0±2.5 <sup>***</sup> (n=13)  | 26.8±2.4 <sup>###, NS</sup> (n=21)  |
| Fasting blood glucose (mg/dl) | 144±35 (n=14)    | 153±27 (n=11)     | 521±87 <sup>***</sup> (n=10)    | 519±51 <sup>###, NS</sup> (n=16)    |
| SBP (mmHg)                    | 99±4 (n=8)       | 115±24 (n=4)      | 109±13 (n=6)                    | 106±15 <sup>NS</sup> (n=6)          |
| Kidney weight (mg)            | 155.7±15.7 (n=9) | 169.2±20.8 (n=11) | 229.5±24.3 <sup>***</sup> (n=8) | 236.3±48.3 <sup>###, NS</sup> (n=5) |

Data were collected post-STZ 6 months and are presented as mean±SD. SBP, systolic blood pressure.

<sup>\*\*\*</sup> P<0.001 vs. Nondiabetic WT; <sup>###</sup> P<0.001 vs. Nondiabetic PPKM2KO; NS, not significant vs. Diabetic WT.

Number of mice in each group is shown.

Supplementary Table 11: Metabolic characteristics of nondiabetic and diabetic DBA2/J mice treated with TEPP-46

|                               | Nondiabetic Vehicle | Diabetic Vehicle              | Diabetic TEPP-46                |
|-------------------------------|---------------------|-------------------------------|---------------------------------|
| Body weight (g)               | 36.1±5.2 (n=9)      | 22.9±0.7 <sup>***</sup> (n=8) | 23.6±1.3 <sup>***</sup> (n=11)  |
| Fasting blood glucose (mg/dl) | 120±20 (n=9)        | 520±80 <sup>***</sup> (n=8)   | 497±137 <sup>***</sup> (n=11)   |
| SBP (mmHg)                    | 105±9 (n=12)        | 110±17 (n=7)                  | 105±9 (n=7)                     |
| Kidney weight (mg)            | 263.1±27.9 (n=6)    | 297.3±31.2 (n=8)              | 282.1±28.0 (n=11)               |
| KW/BW (mg/g)                  | 7.1±0.9 (n=6)       | 13.0±1.6 <sup>***</sup> (n=8) | 11.9±0.98 <sup>***</sup> (n=11) |
| HW/BW (mg/g)                  | 4.97±0.57 (n=6)     | 5.61±0.50 (n=12)              | 5.18±0.27 (n=4)                 |

Mice were treated with either vehicle or TEPP-46 for further 3 months after 3 months of diabetes.

Data were collected post-STZ 6 months and are presented as mean±SD.

SBP, systolic blood pressure; KW/BW, kidney weight/body weight ratio; HW/BW, heart weight/body weight ratio;

\*\*\* P<0.001 vs. Nondiabetic Vehicle; Number of mice in each group is shown.



Supplementary Table 12: Blood counts and plasma chemistries of DBA2/J mice treated with TEPP-46 for further 3 months after 3 months of diabetes

| Treatment group     | WBC ( $\times 10^3$ )             | HEMATOCRIT (% PCV)     | PLATELETS ( $\times 10^3$ )          | Aspartate Aminotransferase (IU/L) | Alanine Aminotransferase (IU/L) | Gamma-Glutamyl Transferase (IU/L) | TOTAL BILIRUBIN (mg/dL) | BUN (mg/dL)       | Creatinine (mg/dL)    | Total cholesterol (mg/dl) | Triglyceride (mg/dl)    |
|---------------------|-----------------------------------|------------------------|--------------------------------------|-----------------------------------|---------------------------------|-----------------------------------|-------------------------|-------------------|-----------------------|---------------------------|-------------------------|
| Nondiabetic Vehicle | 13.9 $\pm$ 5.2 (n=10)             | 42.0 $\pm$ 3.4 (n=10)  | 712.6 $\pm$ 62.0 (n=10)              | 117 $\pm$ 49 (n=6)                | 23 $\pm$ 19 (n=6)               | 4 $\pm$ 1 (n=6)                   | 0.3 $\pm$ 0.1 (n=6)     | 20 $\pm$ 6 (n=10) | 0.11 $\pm$ 0.05 (n=6) | 106.6 $\pm$ 10.5 (n=6)    | 183.4 $\pm$ 27.5 (n=6)  |
| Diabetic Vehicle    | 17.9 $\pm$ 5.6 (n=16)             | 46.6 $\pm$ 6.0* (n=16) | 960.8 $\pm$ 212.2*** (n=16)          | 364 $\pm$ 175* (n=5)              | 232 $\pm$ 78** (n=5)            | 6 $\pm$ 5 (n=5)                   | 2.1 $\pm$ 0.2* (n=5)    | 23 $\pm$ 14 (n=9) | 0.10 $\pm$ 0.06 (n=7) | 155.4 $\pm$ 45.1* (n=7)   | 312.8 $\pm$ 203.0 (n=7) |
| Diabetic TEPP-46    | 13.6 $\pm$ 2.0 <sup>#</sup> (n=9) | 45.4 $\pm$ 4.0 (n=9)   | 897.1 $\pm$ 219.9 <sup>†</sup> (n=9) | 269 $\pm$ 84 <sup>†</sup> (n=5)   | 179 $\pm$ 89* (n=5)             | 6 $\pm$ 2 (n=5)                   | 1.0 $\pm$ 0.1*** (n=5)  | 25 $\pm$ 8 (n=9)  | 0.10 $\pm$ 0.03 (n=6) | 154.6 $\pm$ 29.9*** (n=9) | 242.1 $\pm$ 59.2 (n=9)  |

Data are presented as mean $\pm$ SD. WBC: White Blood Cells; PCV: Packed Cell Volume.

\*\*\* P<0.001, \*\*P<0.005, \* P<0.05 vs. Nondiabetic Vehicle; # P<0.05 vs. Diabetic Vehicle. Number of mice in each group is shown.

Supplementary Table 13: Metabolic characteristics of nondiabetic and diabetic *eNos* KO mice treated with TEPP-46

|                               | Nondiabetic Vehicle | Diabetic Vehicle  | Diabetic TEPP-46               |
|-------------------------------|---------------------|-------------------|--------------------------------|
| Body weight (g)               | 27.3±2 (n=5)        | 21.6±0.7** (n=8)  | 21.7±1.6*** (n=7)              |
| Fasting blood glucose (mg/dl) | 105±21 (n=5)        | 539±28*** (n=8)   | 455±109 *** (n=7)              |
| SBP (mmHg)                    | 133±6.6 (n=10)      | 128±9* (n=9)      | 123±6 (n=9)                    |
| Plasma creatinine (mg/dL)     | 0.17±0.03 (n=5)     | 0.15±0.04 (n=7)   | 0.11±0.03 (n=5)                |
| BUN (mg/dL)                   | 30±6(n=5)           | 39±10 (n=7)       | 31±11(n=6)                     |
| Kidney weight (mg)            | 135.7±13.8 (n=5)    | 178.2±10.5**(n=8) | 146.5±23.5 <sup>##</sup> (n=7) |

*eNos* KO mice were treated with either vehicle or TEPP-46 for 6 wks after 7 wks of diabetes.

Data were collected post-STZ 13 weeks. SBP, systolic blood pressure.

Data are presented as mean±SD. \*\*\*P<0.001, \*\*P<0.005, \*P<0.05 vs. Nondiabetic Vehicle;

##P<0.005 vs. Diabetic Vehicle. Number of mice in each group is shown.

Supplementary Table 14: SYBR green RT-qPCR primer sequences

| Gene symbol      | Forward primer (5'-3') | Reverse primer (5'-3')   |
|------------------|------------------------|--------------------------|
| <i>mFn</i>       | CGAGGTGACAGAGACCACAA   | CTGGAGTCAAGCCAGACACA     |
| <i>mCol1</i>     | GTCCCAACCCCAAAGAC      | CATCTTCTGAGTTTGGTGATACGT |
| <i>mCol3a</i>    | ACAGCTGGTGAACCTGGAAG   | ACCAGGAGATCCATCTCGAC     |
| <i>mCol4a</i>    | GACAGCCAGGTTTGACAGGT   | GGCAGCTCTCTCCTTTCTGA     |
| <i>mTgfβ1</i>    | CCTGAGTGGCTGTCTTTTGA   | CGTGGAGTTTGTTATCTTTGCTG  |
| <i>36b4</i>      | GCTCCAAGCAGATGCAGCA    | CCGGATGTGAGGCAGCAG       |
| <i>mPpargc1a</i> | GTCAACAGCAAAGCCACAA    | TCTGGGGTCAGAGGAAGAGA     |
| <i>mOpa1</i>     | GTGTGCTGGAAATGATTGCTC  | TGGTGAGATCAAATTCCCGAG    |
| <i>mPkm1</i>     | GCTGTTTGAAGAGCTTGTGC   | TTATAAGAGGCCTCCACGCT     |
| <i>mPkm2</i>     | TGTCTGGAGAAACAGCCAAG   | TCCTCGAATAGCTGCAAGTG     |
